# Supplementary material
Source: publisher figshare collection journal article supplement (https://acs.figshare.com/ndownloader/files/8244872)
Supplement: Supplementary file 1 [file 8244872]

 
data_NMPCB:100k
 
_audit_creation_method            SHELXL-2013
_chemical_name_systematic
;
 ?
;
_chemical_name_common             ?
_chemical_melting_point           ?
_chemical_formula_moiety          ?
_chemical_formula_sum
 'C15 H36 Br3 Cl6 N3 Sb2' 
_chemical_formula_weight          954.40

loop_
 _atom_type_symbol
 _atom_type_description
 _atom_type_scat_dispersion_real
 _atom_type_scat_dispersion_imag
 _atom_type_scat_source
 'C'  'C'   0.0033   0.0016
 'International Tables Vol C Tables 4.2.6.8 and 6.1.1.4'
 'H'  'H'   0.0000   0.0000
 'International Tables Vol C Tables 4.2.6.8 and 6.1.1.4'
 'N'  'N'   0.0061   0.0033
 'International Tables Vol C Tables 4.2.6.8 and 6.1.1.4'
 'Cl'  'Cl'   0.1484   0.1585
 'International Tables Vol C Tables 4.2.6.8 and 6.1.1.4'
 'Br'  'Br'  -0.2901   2.4595
 'International Tables Vol C Tables 4.2.6.8 and 6.1.1.4'
 'Sb'  'Sb'  -0.5866   1.5461
 'International Tables Vol C Tables 4.2.6.8 and 6.1.1.4'
 
_space_group_crystal_system       trigonal
_space_group_IT_number            161
_space_group_name_H-M_alt         'R 3 c :H'
_space_group_name_Hall            'R 3 -2"c'
 
_shelx_space_group_comment
;
The symmetry employed for this shelxl refinement is uniquely defined
by the following loop, which should always be used as a source of
symmetry information in preference to the above space-group names.
They are only intended as comments.
;
 
loop_
 _space_group_symop_operation_xyz
 'x, y, z'
 '-y, x-y, z'
 '-x+y, -x, z'
 '-x+y, y, z+1/2'
 'x, x-y, z+1/2'
 '-y, -x, z+1/2'
 'x+2/3, y+1/3, z+1/3'
 '-y+2/3, x-y+1/3, z+1/3'
 '-x+y+2/3, -x+1/3, z+1/3'
 '-x+y+2/3, y+1/3, z+5/6'
 'x+2/3, x-y+1/3, z+5/6'
 '-y+2/3, -x+1/3, z+5/6'
 'x+1/3, y+2/3, z+2/3'
 '-y+1/3, x-y+2/3, z+2/3'
 '-x+y+1/3, -x+2/3, z+2/3'
 '-x+y+1/3, y+2/3, z+7/6'
 'x+1/3, x-y+2/3, z+7/6'
 '-y+1/3, -x+2/3, z+7/6'
 
_cell_length_a                    15.2807(7)
_cell_length_b                    15.2807(7)
_cell_length_c                    23.3345(11)
_cell_angle_alpha                 90
_cell_angle_beta                  90
_cell_angle_gamma                 120
_cell_volume                      4718.6(5)
_cell_formula_units_Z             6
_cell_measurement_temperature     100(2)
_cell_measurement_reflns_used     3921 
_cell_measurement_theta_min       3.7190 
_cell_measurement_theta_max       29.0060 
 
_exptl_crystal_description        Block 
_exptl_crystal_colour             yellow 
_exptl_crystal_density_meas       ? 
_exptl_crystal_density_method     ?              
_exptl_crystal_density_diffrn     2.015          
_exptl_crystal_F_000              2736
_exptl_transmission_factor_min    ?                                             
_exptl_transmission_factor_max    ?                                             
_exptl_crystal_size_max           0.46 
_exptl_crystal_size_mid           0.37 
_exptl_crystal_size_min           0.25 
_exptl_absorpt_coefficient_mu     6.048
_shelx_estimated_absorpt_T_min    ? 
_shelx_estimated_absorpt_T_max    ? 
_exptl_absorpt_correction_type    'multi-scan' 
_exptl_absorpt_correction_T_min   0.12741 
_exptl_absorpt_correction_T_max   1.00000 
_exptl_absorpt_process_details    ? 
 
_exptl_special_details
;
 ?
;
 
_diffrn_ambient_temperature       100(2)
_diffrn_radiation_wavelength      0.71073
_diffrn_radiation_type            MoK\a
_diffrn_radiation_source          'fine-focus sealed tube' 
_diffrn_radiation_monochromator   graphite 
_diffrn_measurement_device_type   'SuperNova, Dual, Cu at zero, Atlas '
_diffrn_measurement_method        '\w scans'  
_diffrn_detector_area_resol_mean  ? 
_diffrn_reflns_number             5238
_diffrn_reflns_av_unetI/netI      0.0536
_diffrn_reflns_av_R_equivalents   0.0690
_diffrn_reflns_limit_h_min        -16
_diffrn_reflns_limit_h_max        15
_diffrn_reflns_limit_k_min        -15
_diffrn_reflns_limit_k_max        18
_diffrn_reflns_limit_l_min        -27
_diffrn_reflns_limit_l_max        23
_diffrn_reflns_theta_min          3.540
_diffrn_reflns_theta_max          24.982
_diffrn_reflns_theta_full         25.242
_diffrn_measured_fraction_theta_max   0.998
_diffrn_measured_fraction_theta_full  0.963
_diffrn_reflns_Laue_measured_fraction_max    0.998
_diffrn_reflns_Laue_measured_fraction_full   0.963
_diffrn_reflns_point_group_measured_fraction_max   0.998
_diffrn_reflns_point_group_measured_fraction_full  0.964
_reflns_number_total              1539
_reflns_number_gt                 1492
_reflns_threshold_expression      'I > 2\s(I)'
_reflns_Friedel_coverage          0.991
_reflns_Friedel_fraction_max      0.999
_reflns_Friedel_fraction_full     0.965
 
_reflns_special_details
;
 Reflections were merged by SHELXL according to the crystal
 class for the calculation of statistics and refinement.
 
 _reflns_Friedel_fraction is defined as the number of unique
 Friedel pairs measured divided by the number that would be
 possible theoretically, ignoring centric projections and
 systematic absences.
;
 
_computing_data_collection        ?
_computing_cell_refinement        ?
_computing_data_reduction         ?
_computing_structure_solution     ?
_computing_structure_refinement   'SHELXL-2013 (Sheldrick, 2013)'
_computing_molecular_graphics     ?
_computing_publication_material   ?
 
_refine_special_details
;
 Refined as a 2-component perfect inversion twin.
;
_refine_ls_structure_factor_coef  Fsqd
_refine_ls_matrix_type            full
_refine_ls_weighting_scheme       calc
_refine_ls_weighting_details
;
 w=1/[\s^2^(Fo^2^)+(0.1025P)^2^+192.8292P]
 where P=(Fo^2^+2Fc^2^)/3
;
_atom_sites_solution_primary      ?
_atom_sites_solution_secondary    ?
_atom_sites_solution_hydrogens    mixed
_refine_ls_hydrogen_treatment     constr
_refine_ls_extinction_method      none
_refine_ls_extinction_coef        .
_refine_ls_abs_structure_details
;
 Refined as a perfect inversion twin.
;
_refine_ls_abs_structure_Flack    ?
_chemical_absolute_configuration  ?
_refine_ls_number_reflns          1539
_refine_ls_number_parameters      89
_refine_ls_number_restraints      1
_refine_ls_R_factor_all           0.0714
_refine_ls_R_factor_gt            0.0693
_refine_ls_wR_factor_ref          0.1976
_refine_ls_wR_factor_gt           0.1943
_refine_ls_goodness_of_fit_ref    1.251
_refine_ls_restrained_S_all       1.250
_refine_ls_shift/su_max           0.000
_refine_ls_shift/su_mean          0.000
 
loop_
 _atom_site_label
 _atom_site_type_symbol
 _atom_site_fract_x
 _atom_site_fract_y
 _atom_site_fract_z
 _atom_site_U_iso_or_equiv
 _atom_site_adp_type
 _atom_site_occupancy
 _atom_site_site_symmetry_order  
 _atom_site_calc_flag
 _atom_site_refinement_flags_posn
 _atom_site_refinement_flags_adp
 _atom_site_refinement_flags_occupancy
 _atom_site_disorder_assembly
 _atom_site_disorder_group
Sb1 Sb 0.3333 0.6667 0.84633(11) 0.0244(8) Uani 1 3 d S T P . .
Sb2 Sb 0.3333 0.6667 0.67751(11) 0.0222(8) Uani 1 3 d S T P . .
Br1 Br 0.30573(19) 0.49569(19) 0.76209(15) 0.0325(7) Uani 1 1 d . . . . .
Cl2 Cl 0.1802(3) 0.5514(4) 0.6181(2) 0.0103(10) Uani 1 1 d . . . . .
Cl1 Cl 0.4763(4) 0.6755(4) 0.9063(2) 0.0124(10) Uani 1 1 d . . . . .
C3 C 0.037(3) 0.660(3) 0.5318(14) 0.064(11) Uani 1 1 d . . . . .
H3A H 0.0421 0.6643 0.4895 0.076 Uiso 1 1 calc R U . . .
H3B H 0.0411 0.6011 0.5451 0.076 Uiso 1 1 calc R U . . .
N1 N -0.0332(17) 0.6907(17) 0.6146(10) 0.032(5) Uani 1 1 d . . . . .
C2 C -0.054(2) 0.656(3) 0.5511(15) 0.052(9) Uani 1 1 d . . . . .
H2A H -0.1117 0.5862 0.5481 0.063 Uiso 1 1 calc R U . . .
H2B H -0.0686 0.7014 0.5281 0.063 Uiso 1 1 calc R U . . .
C5 C 0.079(2) 0.749(3) 0.6214(15) 0.056(9) Uani 1 1 d . . . . .
H5A H 0.1028 0.7127 0.6465 0.067 Uiso 1 1 calc R U . . .
H5B H 0.1020 0.8169 0.6374 0.067 Uiso 1 1 calc R U . . .
C1 C -0.086(3) 0.610(3) 0.6578(15) 0.056(9) Uani 1 1 d . . . . .
H1A H -0.0932 0.5469 0.6436 0.084 Uiso 1 1 calc R U . . .
H1B H -0.1536 0.6013 0.6649 0.084 Uiso 1 1 calc R U . . .
H1C H -0.0476 0.6295 0.6936 0.084 Uiso 1 1 calc R U . . .
C4 C 0.118(3) 0.756(3) 0.5589(14) 0.070(12) Uani 1 1 d . . . . .
H4A H 0.1241 0.8160 0.5391 0.083 Uiso 1 1 calc R U . . .
H4B H 0.1836 0.7584 0.5583 0.083 Uiso 1 1 calc R U . . .
H1 H -0.0530 0.7419 0.6074 0.083 Uiso 1 1 d R U . . .
 
loop_
 _atom_site_aniso_label
 _atom_site_aniso_U_11
 _atom_site_aniso_U_22
 _atom_site_aniso_U_33
 _atom_site_aniso_U_23
 _atom_site_aniso_U_13
 _atom_site_aniso_U_12
Sb1 0.0239(10) 0.0239(10) 0.0253(18) 0.000 0.000 0.0119(5)
Sb2 0.0220(10) 0.0220(10) 0.0225(18) 0.000 0.000 0.0110(5)
Br1 0.0354(15) 0.0291(13) 0.0336(13) 0.0024(11) 0.0033(12) 0.0165(11)
Cl2 0.009(2) 0.015(2) 0.008(2) -0.0063(19) -0.0060(17) 0.0062(18)
Cl1 0.015(2) 0.015(2) 0.011(2) 0.001(2) -0.009(2) 0.0103(19)
C3 0.06(2) 0.11(3) 0.027(18) -0.02(2) -0.005(16) 0.05(2)
N1 0.034(12) 0.035(12) 0.034(12) 0.000(10) 0.004(10) 0.021(10)
C2 0.021(13) 0.06(2) 0.07(2) -0.038(19) -0.006(14) 0.017(14)
C5 0.032(16) 0.08(2) 0.06(2) -0.023(18) -0.021(16) 0.027(17)
C1 0.049(18) 0.06(2) 0.04(2) 0.010(17) 0.010(15) 0.020(17)
C4 0.05(2) 0.11(3) 0.05(2) 0.05(2) 0.028(17) 0.04(2)
 
_geom_special_details
;
 All esds (except the esd in the dihedral angle between two l.s. planes)
 are estimated using the full covariance matrix.  The cell esds are taken
 into account individually in the estimation of esds in distances, angles
 and torsion angles; correlations between esds in cell parameters are only
 used when they are defined by crystal symmetry.  An approximate (isotropic)
 treatment of cell esds is used for estimating esds involving l.s. planes.
;
 
loop_
 _geom_bond_atom_site_label_1
 _geom_bond_atom_site_label_2
 _geom_bond_distance
 _geom_bond_site_symmetry_2
 _geom_bond_publ_flag
Sb1 Cl1 2.540(5) 2_665 ?
Sb1 Cl1 2.540(5) 3_565 ?
Sb1 Cl1 2.540(5) . ?
Sb2 Cl2 2.526(5) 3_565 ?
Sb2 Cl2 2.526(5) . ?
Sb2 Cl2 2.526(5) 2_665 ?
C3 C2 1.43(4) . ?
C3 C4 1.50(6) . ?
N1 C1 1.48(4) . ?
N1 C5 1.50(4) . ?
N1 C2 1.55(4) . ?
C5 C4 1.56(4) . ?
 
loop_
 _geom_angle_atom_site_label_1
 _geom_angle_atom_site_label_2
 _geom_angle_atom_site_label_3
 _geom_angle
 _geom_angle_site_symmetry_1
 _geom_angle_site_symmetry_3
 _geom_angle_publ_flag
Cl1 Sb1 Cl1 92.57(19) 2_665 3_565 ?
Cl1 Sb1 Cl1 92.57(19) 2_665 . ?
Cl1 Sb1 Cl1 92.57(19) 3_565 . ?
Cl2 Sb2 Cl2 92.76(18) 3_565 . ?
Cl2 Sb2 Cl2 92.76(18) 3_565 2_665 ?
Cl2 Sb2 Cl2 92.76(18) . 2_665 ?
C2 C3 C4 103(3) . . ?
C1 N1 C5 114(3) . . ?
C1 N1 C2 116(3) . . ?
C5 N1 C2 106(2) . . ?
C3 C2 N1 105(2) . . ?
N1 C5 C4 103(2) . . ?
C3 C4 C5 103(3) . . ?
 
loop_
 _geom_torsion_atom_site_label_1
 _geom_torsion_atom_site_label_2
 _geom_torsion_atom_site_label_3
 _geom_torsion_atom_site_label_4
 _geom_torsion
 _geom_torsion_site_symmetry_1
 _geom_torsion_site_symmetry_2
 _geom_torsion_site_symmetry_3
 _geom_torsion_site_symmetry_4
 _geom_torsion_publ_flag
C4 C3 C2 N1 -40(4) . . . . ?
C1 N1 C2 C3 -107(3) . . . . ?
C5 N1 C2 C3 21(4) . . . . ?
C1 N1 C5 C4 136(3) . . . . ?
C2 N1 C5 C4 7(4) . . . . ?
C2 C3 C4 C5 45(4) . . . . ?
N1 C5 C4 C3 -31(4) . . . . ?
 
_refine_diff_density_max    2.413
_refine_diff_density_min   -1.556
_refine_diff_density_rms    0.321

_shelxl_version_number 2013-2

_shelx_res_file
;
REM kl</HKL>
REM
REM R1 =  0.1827 for   1894 Fo > 4sig(Fo)  and  0.1905 for all   2043 data
REM     83 parameters refined using      1 restraints
REM Highest difference peak 24.924,  deepest hole -5.380,  1-sigma level  1.167
REM The information below was added by Olex2.
REM
REM R1 = 0.1827 for 1894 Fo > 4sig(Fo) and n/a for all 6782 data
REM n/a parameters refined using n/a restraints
REM Highest difference peak 24.92, deepest hole -5.38
REM Mean Shift 0.613, Max Shift 0.201.
REM +++ Tabular Listing of Refinement Information +++
REM R1_all = n/a
REM R1_gt = 0.1827
REM wR_ref = 0.4785
REM GOOF = 3.818
REM Shift_max = 0.201
REM Shift_mean = 0.613
REM Reflections_all = 6782
REM Reflections_gt = 1894
REM Parameters = n/a
REM Hole = 24.92
REM Peak = -5.38
REM
REM R1 =  0.0863 for   1894 Fo > 4sig(Fo)  and  0.0928 for all   2043 data
REM     88 parameters refined using      1 restraints
REM Highest difference peak  3.521,  deepest hole -2.311,  1-sigma level  0.382
REM
REM R1 =  0.0790 for   1894 Fo > 4sig(Fo)  and  0.0854 for all   2043 data
REM     89 parameters refined using      1 restraints
REM Highest difference peak  3.914,  deepest hole -2.217,  1-sigma level  0.376
REM
REM R1 =  0.0695 for    1492 Fo > 4sig(Fo)  and  0.0716 for all    1539 data
REM     89 parameters refined using      1 restraints
REM Highest difference peak  2.660,  deepest hole -1.567,  1-sigma level  0.326
TITL
CELL 0.71073 15.2807 15.2807 23.3345 90.000 90.000 120.000
ZERR 6.0000 0.0007 0.0007 0.0011 0.000 0.000 0.000
LATT -3
SYMM -Y, X-Y, Z
SYMM -X+Y, -X, Z
SYMM -X+Y, Y, 0.5+Z
SYMM X, X-Y, 0.5+Z
SYMM -Y, -X, 0.5+Z
SFAC C H N CL BR SB
UNIT 90 216 18 36 18 12
MERG 2
OMIT -3 50
FMAP 2
GRID
PLAN 5
TEMP -100
CONF
HTAB
CONF
TWIN
L.S. 20
ACTA
WGHT    0.102500  192.829208
FVAR       1.12147
SB1   6    0.333333    0.666667    0.846327    10.33333    0.02389    0.02389 =
         0.02528    0.00000    0.00000    0.01195
SB2   6    0.333333    0.666667    0.677513    10.33333    0.02202    0.02202 =
         0.02252    0.00000    0.00000    0.01101
BR1   5    0.305731    0.495690    0.762091    11.00000    0.03542    0.02914 =
         0.03357    0.00239    0.00326    0.01652
CL2   4    0.180191    0.551375    0.618099    11.00000    0.00867    0.01488 =
         0.00789   -0.00633   -0.00595    0.00620
CL1   4    0.476274    0.675536    0.906276    11.00000    0.01521    0.01487 =
         0.01075    0.00094   -0.00851    0.01033
C3    1    0.037088    0.660461    0.531818    11.00000    0.05988    0.11213 =
         0.02665   -0.02027   -0.00455    0.04871
AFIX  23
H3A   2    0.042138    0.664303    0.489497    11.00000   -1.20000
H3B   2    0.041132    0.601050    0.545097    11.00000   -1.20000
AFIX   0
N1    3   -0.033217    0.690686    0.614648    11.00000    0.03387    0.03483 =
         0.03377   -0.00048    0.00427    0.02100
C2    1   -0.053763    0.655900    0.551068    11.00000    0.02084    0.06314 =
         0.06781   -0.03824   -0.00616    0.01716
AFIX  23
H2A   2   -0.111654    0.586173    0.548081    11.00000   -1.20000
H2B   2   -0.068601    0.701427    0.528110    11.00000   -1.20000
AFIX   0
C5    1    0.079123    0.748878    0.621359    11.00000    0.03241    0.07586 =
         0.05962   -0.02320   -0.02108    0.02674
AFIX  23
H5A   2    0.102786    0.712692    0.646481    11.00000   -1.20000
H5B   2    0.101962    0.816923    0.637397    11.00000   -1.20000
AFIX   0
C1    1   -0.086395    0.610326    0.657838    11.00000    0.04900    0.06249 =
         0.04481    0.01049    0.01010    0.01978
AFIX 137
H1A   2   -0.093154    0.546879    0.643630    11.00000   -1.50000
H1B   2   -0.153640    0.601315    0.664886    11.00000   -1.50000
H1C   2   -0.047638    0.629519    0.693624    11.00000   -1.50000
AFIX   0
C4    1    0.117513    0.755654    0.558896    11.00000    0.04927    0.11491 =
         0.04696    0.04982    0.02773    0.04289
AFIX  23
H4A   2    0.124144    0.815957    0.539067    11.00000   -1.20000
H4B   2    0.183620    0.758393    0.558267    11.00000   -1.20000
AFIX   3
H1    2   -0.052977    0.741944    0.607416    11.00000   -1.20000
AFIX   0
HKLF 4

REM
REM R1 =  0.0693 for    1492 Fo > 4sig(Fo)  and  0.0714 for all    1539 data
REM     89 parameters refined using      1 restraints

END

WGHT      0.1249    193.1774

REM Instructions for potential hydrogen bonds
EQIV $1 -y+1/3, x-y+2/3, z-1/3
HTAB C2 Br1_$1
EQIV $2 -x+y-1/3, y+1/3, z-1/6
HTAB C2 Br1_$2
EQIV $3 -x+y, -x+1, z
HTAB C5 Br1_$3
EQIV $4 -y+2/3, -x+4/3, z-1/6
HTAB C5 Br1_$4
HTAB C4 Cl2_$2
HTAB C4 Cl2_$3
HTAB N1 Br1_$2

REM Highest difference peak  2.413,  deepest hole -1.556,  1-sigma level  0.321
Q1    1   0.5095  0.7949  0.8987  11.00000  0.05    1.03
Q2    1   0.2771  0.5303  0.7448  11.00000  0.05    0.95
Q3    1   0.2844  0.5910  0.8244  11.00000  0.05    0.92
Q4    1   0.3133  0.7121  0.6544  11.00000  0.05    0.91
Q5    1   0.4589  0.6422  0.9743  11.00000  0.05    0.88
;
_shelx_res_checksum   66694

_shelx_hkl_file
;
   0   0 -30-1038.08 1830.51   2
   0   0 -27-1762.67 1852.90   1
   0   0 -24 12027.3 2662.68   1
   0   0 -21-224.807 532.936   1
   0   0 -15 60.3587 198.677   1
   0   0 -12 227256. 9152.46   1
   0   0  -9 28.5143 409.851   1
   0   0  -6 112803. 4760.63   1
   0   0   6 151884. 4749.87   1
   0   0   9-385.097 418.132   1
   0   0  12 343448. 9256.04   1
   0   0  15 46.1274 151.617   1
   0   0  18 82497.3 5343.75   1
   0   0  21-407.724 564.347   1
   1  -1 -28 1113.82 1195.76   2
  -1   0 -28-452.271 1529.79   2
  -1   0 -28-495.813 1484.20   1
  -1   0 -25-5220.21 2213.04   2
  -1   0 -25-4235.07 1676.98   1
   1  -1 -25-1007.40 1253.83   1
  -1   0 -22 68068.4 6225.82   1
   1  -1 -22 73484.4 5975.96   1
  -1   0 -19-513.128 1080.89   1
   0   1 -19 534.560 578.647   1
   1  -1 -16 4270.43 1176.54   1
   1  -1 -13-508.003 787.929   1
  -1   0 -13-341.613 685.917   1
   0   1 -13 266.849 524.787   1
  -1   0 -10 13608.6 1929.82   1
   1  -1 -10 11495.8 1693.06   1
   0   1 -10 17706.7 2509.89   1
  -1   0  -7 26.7869 403.563   1
   0   1  -7 475.562 440.971   1
   1  -1  -7-3.04780 157.356   1
   0   1   5 112.055 70.0706   1
  -1   0   5 143.990 109.550   1
   1  -1   5 42.3984 100.317   1
   0   1   8 149753. 5329.13   1
   1  -1   8 152303. 5939.47   1
   1  -1  11-97.9115 296.804   1
   0   1  11 37.4390 172.880   1
  -1   0  11 322.622 255.498   1
   0   1  14 548518. 12272.6   1
   1  -1  14 536453. 13091.8   1
   0   1  17 286.832 408.082   1
  -1   0  17-77.9674 402.012   1
   1  -1  17 492.594 439.704   1
   1  -1  20 53122.0 4709.11   1
  -1   0  20 39278.8 3647.93   1
   0   1  20 50766.8 4221.85   1
   0   1  23-250.611 639.008   1
  -1   0  23 84.9897 597.931   1
  -1   1 -29-2417.48 1976.32   1
   1   0 -29-4994.42 2295.25   2
   0  -1 -29-1608.47 1745.94   2
  -1   1 -29-217.086 946.061   2
   0  -1 -26 8483.82 2517.22   2
   0  -1 -26 13178.2 2637.05   1
  -1   1 -26 22032.8 3927.02   1
   1   0 -26 20742.9 3553.80   1
   0  -1 -23 108.329 790.530   1
   0  -1 -23-1704.74 1962.32   2
  -1   1 -23 299.883 676.874   1
   1   0 -23 967.901 1116.79   1
   1   0 -20 44540.1 4923.60   1
  -1   1 -20 41860.2 5022.85   1
   0  -1 -20 28822.6 3685.61   1
  -1   1 -17 810.000 999.131   1
   0  -1 -14 395639. 11333.7   1
   1   0 -14 493192. 14423.2   1
   1   0 -11 347.060 454.091   1
   0  -1 -11 23.5826 277.603   1
  -1   1 -11-196.317 688.659   1
   0  -1  -8 172115. 5282.89   1
   1   0  -8 164429. 5476.95   1
   1   0  -5 140.732 114.783   1
   0  -1  -5-60.8613 157.096   2
   1   0   4 149229. 3831.66   1
   0  -1   4 151711. 3752.78   1
  -1   1   7-85.2232 266.139   1
   0  -1   7 47.2768 176.896   1
   1   0   7 67.0933 241.096   1
   0  -1  10 19569.1 2077.45   1
  -1   1  10 17971.3 1711.56   1
   1   0  10 20405.2 2407.37   1
  -1   1  13 212.491 166.998   1
   1   0  13 465.724 521.238   1
   0  -1  13 199.966 311.858   1
   0  -1  16 6920.45 1502.36   1
   1   0  16 9458.63 1853.62   1
  -1   1  16 6711.65 1329.58   1
   0  -1  19-578.781 684.319   1
  -1   1  19-385.451 532.610   1
   1   0  19 322.419 556.322   1
  -1   1  22 116139. 6458.95   1
   0   2 -29 508.351 657.538   1
   2  -2 -29-2022.40 1815.01   2
  -2   0 -29-986.031 2018.81   2
   2  -2 -26-43.1616 1352.92   2
  -2   0 -26-1322.61 2034.31   1
  -2   0 -26-1266.27 1837.15   2
  -2   0 -23-787.796 1512.37   1
   2  -2 -23-2025.78 1674.85   2
   2  -2 -23 329.217 484.575   1
  -2   0 -20 1515.41 763.220   1
   0   2 -20 5446.91 1800.27   1
   2  -2 -17-128.444 346.243   1
  -2   0 -17-569.588 830.961   1
   0   2 -17-655.298 826.253   1
   2  -2 -14 61045.2 3815.51   1
  -2   0 -11 379.685 510.544   1
   2  -2 -11-159.554 405.132   1
   0   2 -11 854.834 675.587   1
  -2   0  -8 10099.4 1527.59   1
   0   2  -8 8909.12 1224.44   1
   2  -2  -8 9588.94 960.903   1
   2  -2  -5 96.5449 85.3319   2
   2  -2  -2 94201.5 1696.85   2
  -2   0  -2 102260. 2673.42   2
  -2   0   4 241234. 3811.56   1
   2  -2   4 223349. 6921.03   1
   2  -2   7 218.205 122.979   1
  -2   0   7 234.901 142.927   1
   0   2   7 19.0493 64.1751   1
  -2   0  10 35160.4 2244.41   1
   0   2  10 33388.3 2497.10   1
   2  -2  10 33777.4 3289.86   1
  -2   0  13-132.129 306.922   1
   0   2  13-252.560 503.565   1
   2  -2  13 502.296 683.887   1
   0   2  16 60088.2 4221.04   1
  -2   0  16 52585.5 3621.69   1
   0   2  19 596.447 525.763   1
  -2   0  19-69.8740 391.391   1
   2  -2  19-163.456 421.838   1
   0   2  22 24837.8 2977.04   1
  -2   0  22 19097.5 2662.20   1
   2  -1 -30 2904.19 1241.83   2
  -2   1 -30 4604.67 1083.80   1
   2  -1 -27-2123.28 1699.57   2
  -1   2 -27 1334.70 1114.83   1
  -2   1 -27-1859.36 2175.43   1
  -2   1 -27-1741.89 1834.83   2
  -1  -1 -27-807.816 1165.61   2
   1   1 -27 995.470 1186.22   1
   1  -2 -27-412.147 1320.11   2
  -2   1 -24 18265.0 3485.25   1
   2  -1 -24 13427.9 2541.50   1
   1   1 -24 42632.3 5340.05   1
  -1   2 -24 44105.0 5705.57   1
   1  -2 -24 17380.1 3476.92   2
  -1  -1 -24 14000.2 3290.89   2
  -1  -1 -21 535.672 385.498   1
  -1  -1 -21-348.333 1439.74   2
  -2   1 -21 637.900 321.391   1
   2  -1 -21 438.564 484.638   1
   1  -2 -21-375.236 1105.54   2
   1   1 -18 121886. 8179.40   1
  -2   1 -18 56546.9 5595.77   1
  -1  -1 -18 82132.7 7067.95   2
  -1  -1 -18 79332.0 5858.63   1
  -1   2 -18 141186. 9315.06   1
   1  -2 -18 91022.1 6956.09   2
   2  -1 -15 5881.24 1455.57   1
   1  -2 -15 6644.96 1636.73   2
   1  -2 -15 8976.77 1604.97   1
   1  -2 -12 267887. 7140.10   1
  -1  -1 -12 254020. 8288.49   1
  -1   2 -12 283320. 11405.1   1
   1   1 -12 267756. 8903.11   1
   1  -2  -9 59060.4 2693.54   1
   1  -2  -9 61974.1 3627.86   2
  -1  -1  -9 55943.9 3302.40   1
   1   1  -9 54200.5 3024.29   1
  -1  -1  -9 57365.5 3899.13   2
   2  -1  -9 47352.3 3044.51   1
  -1   2  -9 49845.2 4263.16   1
   1  -2  -6 52683.3 2531.12   2
  -1  -1  -6 52007.1 2846.28   2
   2  -1  -6 57281.8 1984.58   1
   1   1  -6 51254.7 2298.36   1
  -1  -1  -3 3991.91 582.833   2
   1  -2  -3 3886.70 494.202   2
  -1  -1   3 5016.47 581.780   1
   2  -1   3 5653.96 806.073   1
   1  -2   3 5664.60 821.587   1
  -1   2   6 51553.0 1970.00   1
   2  -1   6 47347.7 3174.29   1
   1   1   6 54710.7 2468.57   1
   1  -2   6 44766.9 2908.08   1
  -1  -1   6 51168.4 2376.47   1
  -2   1   6 51144.9 1667.01   1
  -1  -1   9 54074.7 2970.62   1
   2  -1   9 48257.0 3925.90   1
   1   1   9 51450.0 3178.69   1
  -2   1   9 52955.7 2302.97   1
   1  -2   9 46880.9 3457.16   1
  -1  -1  12 249457. 7402.04   1
   1  -2  12 223241. 8319.06   1
   1   1  12 244375. 8367.64   1
  -1   2  12 224846. 6793.96   1
  -2   1  12 243921. 6108.51   1
   2  -1  15 10451.8 1975.82   1
  -2   1  15 6326.24 1136.58   1
   1   1  15 6938.79 1597.75   1
  -1   2  15 6023.94 1168.27   1
  -1  -1  15 5909.68 1238.21   1
   1  -2  15 6201.23 1504.26   1
  -1  -1  18 86760.7 5379.18   1
  -1   2  18 86570.8 4944.24   1
  -2   1  18 93103.0 4893.00   1
   2  -1  18 128983. 7142.27   1
   1  -2  18 91395.0 6194.98   1
   1   1  18 122843. 6576.87   1
   1   1  21 2441.61 1027.19   1
  -2   1  21 1218.72 541.096   1
  -1  -1  21 1689.40 724.591   1
  -1   2  21 1131.30 505.841   1
   0  -2 -28 1037.22 816.434   2
  -2   2 -28 1569.64 643.763   1
   2   0 -25 334.379 1002.94   1
   0  -2 -25-1818.96 1656.97   2
  -2   2 -25 145.737 631.281   1
   2   0 -22 25406.7 3817.42   1
  -2   2 -22 27012.6 4365.77   1
   0  -2 -22 15152.6 3149.02   2
   0  -2 -19-667.525 1172.75   2
  -2   2 -19 1888.35 1447.39   1
  -2   2 -16 58971.6 5840.43   1
   0  -2 -16 54660.3 5014.63   2
   2   0 -16 55264.9 5086.52   1
   0  -2 -16 55067.2 4116.97   1
   0  -2 -13 943.866 725.364   1
   0  -2 -13-273.137 533.125   2
   2   0 -13 4.25193 198.816   1
   0  -2 -10 40669.2 3178.50   2
   2   0 -10 40496.8 2607.71   1
   2   0  -7 138.749 168.336   1
   0  -2  -7-4.25226 146.326   2
   0  -2  -4 262870. 4978.47   2
   2   0   5 173.470 152.004   1
   0  -2   5 111.857 85.5431   1
   0  -2   8 8842.64 1284.03   1
  -2   2   8 10006.6 864.040   1
   2   0   8 9126.92 1407.54   1
   2   0  11 115.239 219.161   1
  -2   2  11 6.02551 77.2664   1
   0  -2  11 237.479 439.299   1
   2   0  14 86920.4 5714.15   1
   0  -2  14 73344.0 4789.38   1
  -2   2  14 76398.0 3699.36   1
  -2   2  17 144.371 229.859   1
   0  -2  17 103.108 164.786   1
   2   0  17 427.536 662.512   1
  -2   2  20 3693.32 967.227   1
   0  -2  20 3250.73 1103.81   1
   2   0  20 4591.27 1355.95   1
  -2   2  23-110.962 573.548   1
   0   3 -30 32448.2 5146.73   1
   3  -3 -30 11994.3 3283.47   2
   3  -3 -27 26.5293 768.810   2
  -3   0 -27-1394.93 1531.26   2
   3  -3 -24 26667.7 4206.10   2
  -3   0 -24 9902.72 2827.01   2
   3  -3 -21 959.639 808.080   1
  -3   0 -21-975.976 1124.72   1
   0   3 -21-140.291 472.008   1
   3  -3 -21-1297.35 1197.84   2
   3  -3 -18 133230. 7770.09   2
  -3   0 -18 92450.2 7860.78   2
   0   3 -18 152540. 9302.85   1
  -3   0 -18 91751.4 6921.46   1
   3  -3 -18 137941. 5757.46   1
   3  -3 -15-425.358 622.087   2
   0   3 -15 339.310 579.655   1
  -3   0 -15 451.348 701.115   1
   3  -3 -15 253.904 365.446   1
   3  -3 -12 29024.1 2695.93   2
   3  -3 -12 30281.4 1882.63   1
   0   3  -9-13.5776 206.157   1
  -3   0  -9-257.293 479.388   2
  -3   0  -9 643.755 774.581   1
   3  -3  -9 302.803 176.665   1
   3  -3  -9-101.470 176.607   2
   3  -3  -6 901198. 9222.63   2
  -3   0  -6 999999. 13649.6   2
   3  -3  -3 110.947 77.7349   2
  -3   0  -3 58.5224 109.788   2
  -3   0   0 221275. 3591.19   2
   3  -3   0 136025. 4516.52   1
   3  -3   3 234.448 149.216   1
   3  -3   6 433983. 11020.9   1
  -3   0   9 359.017 206.410   1
   3  -3   9-24.3678 236.618   1
   0   3   9 185.769 189.301   1
   0   3  12 175115. 5901.56   1
  -3   0  12 174177. 5495.20   1
  -3   0  15 413.171 316.509   1
   0   3  15-206.727 472.211   1
  -3   0  18 92246.6 5024.02   1
   0   3  18 98369.1 5585.47   1
   0   3  21 752.904 622.677   1
  -3   0  21 246.179 166.294   1
  -3   1 -28 4114.97 2098.62   2
  -2  -1 -28 5840.09 2318.44   2
  -1   3 -28 34879.8 5370.56   1
   3  -2 -28 9193.01 2679.72   2
   1   2 -28 33302.7 5064.56   1
   2  -3 -28 17372.1 3831.36   2
  -3   1 -25 6632.26 1529.68   1
  -2  -1 -25 10113.7 2753.86   2
  -3   1 -25 1466.00 1281.83   2
   3  -2 -25 12939.9 2286.25   1
  -1   3 -25 32931.5 5042.46   1
   1   2 -25 36752.0 5073.44   1
   2  -3 -25 15091.2 3280.37   2
   3  -2 -25 10448.5 2760.17   2
  -3   1 -22 1100.47 927.974   1
   2  -3 -22 6053.78 1787.40   2
  -1   3 -22 10307.6 2778.92   1
  -2  -1 -22 1842.06 627.286   2
   1   2 -22 10640.7 2608.15   1
  -2  -1 -19 11047.0 2500.01   2
  -3   1 -19 7297.90 1972.83   1
   3  -2 -19 9355.90 1772.25   1
   1   2 -19 20184.4 3407.82   1
  -1   3 -19 26241.6 4124.41   1
   2  -3 -19 14551.4 2678.04   2
   2  -3 -16 62622.1 3678.57   1
   2  -3 -16 57793.4 4758.85   2
   3  -2 -16 28678.5 2959.43   1
  -1   3 -16 66474.3 6126.97   1
  -2  -1 -16 51603.6 5154.43   2
  -3   1 -16 29564.6 3959.43   1
  -2  -1 -13 9111.55 1838.86   2
   3  -2 -13 4503.16 1015.24   1
   2  -3 -13 9098.97 1595.68   2
  -2  -1 -13 10264.8 1867.98   1
   2  -3 -10 54902.3 3349.87   2
  -2  -1 -10 55526.2 4017.52   2
  -3   1 -10 42324.0 3809.66   1
  -1   3 -10 51426.6 3883.26   1
   1   2 -10 55845.9 3232.95   1
  -2  -1  -7 8663.77 1307.10   2
   2  -3  -7 8929.11 1089.44   2
   3  -2  -7 9162.92 742.744   1
   1   2  -7 8104.13 1034.88   1
  -2  -1  -4 189015. 4748.70   2
   2  -3  -4 174079. 3641.32   2
  -3   1  -1 3270.11 434.804   2
  -2  -1  -1 3244.30 505.710   2
   3  -2  -1 3941.67 519.412   1
   2  -3  -1 3542.59 464.862   1
   3  -2   2 20204.2 1712.17   1
   2  -3   2 19757.6 1635.09   1
   3  -2   5 91523.8 4682.39   1
  -2  -1   5 82414.4 2897.90   1
   2  -3   5 82037.1 4161.81   1
  -3   1   8 225624. 4295.96   1
  -2  -1   8 230671. 5690.70   1
   3  -2   8 234484. 8699.73   1
  -1   3   8 249973. 4797.09   1
   1   2   8 250711. 5758.31   1
   1   2  11 86313.7 4118.92   1
  -2  -1  11 88356.3 4089.27   1
  -3   1  11 86549.9 3243.57   1
  -1   3  11 81866.7 3898.42   1
   1   2  14 1593.41 593.372   1
  -2  -1  14 393.976 247.926   1
  -3   1  14 1547.36 501.540   1
   3  -2  14 1667.72 960.793   1
  -1   3  14 1012.87 483.412   1
   2  -3  14 1684.58 799.950   1
  -2  -1  17 73858.6 4756.49   1
   2  -3  17 83704.5 6097.73   1
  -1   3  17 75542.1 4495.82   1
   1   2  17 76095.6 5335.46   1
  -3   1  17 77484.9 4173.66   1
  -2  -1  20 24366.9 2985.91   1
  -1   3  20 25075.7 2731.21   1
   1   2  20 32349.6 3443.89   1
  -3   1  20 24180.5 2562.70   1
  -1   3  23 14783.0 2237.13   1
  -3   1  23 15433.6 2276.69   1
   1  -3 -29 738.631 791.511   2
   3  -1 -29-2339.81 1934.33   2
  -3   2 -29 2311.69 2159.03   2
  -1  -2 -29 443.183 937.571   2
  -2   3 -29 141.463 511.032   1
  -3   2 -29-2157.49 2459.66   1
   1  -3 -26 1854.10 1040.52   2
  -2   3 -26 4997.04 2206.68   1
  -3   2 -26 87.6273 1335.50   1
   2   1 -26 6027.28 2153.45   1
   3  -1 -26 1286.35 337.602   1
  -1  -2 -26 566.570 1039.35   2
   3  -1 -23 11951.3 2455.73   1
  -3   2 -23 13818.8 3120.03   1
   1  -3 -23 12892.7 2964.57   2
   2   1 -23 21280.3 3660.72   1
  -1  -2 -23 11306.1 2928.14   2
   2   1 -20 32856.6 4380.45   1
  -1  -2 -20 19773.0 3488.02   2
   1  -3 -20 23889.0 3623.59   2
  -2   3 -20 34698.8 4885.60   1
  -3   2 -20 21482.6 3865.75   1
   1  -3 -17 79016.9 5908.45   2
   3  -1 -17 76952.9 5742.50   1
  -3   2 -17 67196.7 6355.97   1
  -1  -2 -17 76620.0 6241.05   2
  -1  -2 -14 943.114 460.632   2
   1  -3 -14 732.661 456.840   2
   2   1 -14 1649.39 621.767   1
   3  -1 -14 1093.90 476.396   1
   3  -1 -11 96964.5 4083.20   1
   1  -3 -11 99388.3 5015.69   2
  -1  -2 -11 98467.5 5351.11   2
   2   1 -11 97275.6 4181.45   1
   3  -1  -8 254750. 4787.35   1
   2   1  -8 236415. 5358.21   1
   1  -3  -8 245028. 6552.27   2
  -1  -2  -8 254512. 7241.93   2
   3  -1  -5 82318.7 2110.65   1
   1  -3  -5 89669.0 3183.43   2
  -1  -2  -5 87675.0 3417.92   2
  -1  -2  -2 23013.8 1453.22   2
   1  -3  -2 22469.7 1296.81   2
   1  -3   1 2382.63 459.524   1
   3  -1   1 1824.58 396.611   1
  -1  -2   4 172622. 4354.18   1
  -2   3   4 173515. 3703.92   2
   3  -1   4 187863. 4967.05   1
   1  -3   4 185583. 5164.00   1
  -3   2   7 6210.58 501.792   1
  -1  -2   7 6697.99 1022.51   1
  -2   3   7 6048.51 663.762   1
   2   1   7 7805.67 1049.98   1
   1  -3   7 7745.57 1334.87   1
   3  -1   7 7498.74 1292.37   1
   2   1  10 53898.7 3261.47   1
  -3   2  10 55705.5 2108.21   1
   1  -3  10 52770.1 3864.03   1
  -1  -2  10 56071.3 3435.01   1
   3  -1  10 56057.4 4210.07   1
   2   1  13 8771.16 1619.66   1
  -3   2  13 9005.13 1055.35   1
   1  -3  13 7358.98 1567.48   1
  -1  -2  13 9845.22 1609.78   1
  -2   3  13 7641.20 1055.42   1
   3  -1  13 8434.06 1797.51   1
   1  -3  16 46971.1 4328.81   1
   3  -1  16 62336.9 5041.84   1
  -1  -2  16 52713.6 4164.63   1
  -3   2  16 51644.5 3034.38   1
  -2   3  16 49982.7 3162.39   1
   2   1  16 54230.7 4586.33   1
   2   1  19 19453.0 2737.80   1
  -3   2  19 16948.3 1944.77   1
  -1  -2  19 16769.5 2540.06   1
  -2   3  19 16817.1 2026.14   1
  -3   2  22 6293.92 1324.19   1
  -2   3  22 7032.50 1383.11   1
  -3   3 -30 40556.5 6070.88   1
  -3   3 -27 1217.24 1128.85   1
   0  -3 -27-622.189 1244.69   2
  -3   3 -24 40514.4 5759.55   1
   3   0 -24 36803.2 4661.99   1
   0  -3 -24 25026.2 4323.78   2
   3   0 -21-17.9415 676.269   1
   0  -3 -21-122.315 525.031   2
   0  -3 -18 91793.1 6765.50   2
  -3   3 -18 115653. 8884.51   1
   0  -3 -15 18.3300 221.291   2
  -3   3 -15 182.367 479.076   1
   3   0 -15 649.642 625.301   1
   0  -3 -12 198933. 7739.16   2
   3   0 -12 196996. 5940.22   1
   0  -3  -9 383.406 347.331   2
   3   0  -9 103.992 240.969   1
   3   0  -6 388874. 5835.88   1
   0  -3  -6 418215. 7932.55   2
   0  -3  -3 57.8417 113.657   2
   3   0   0 211090. 3413.14   2
  -3   3   3 89.0927 70.4953   2
   0  -3   3 47.3269 124.843   1
   0  -3   6 930148. 12718.8   1
   3   0   6 945645. 11987.7   1
   3   0   9-130.912 341.216   1
   0  -3   9 27.6895 205.632   1
  -3   3   9 37.1540 51.8671   1
   0  -3  12 32731.9 3094.21   1
  -3   3  12 36562.0 1807.71   1
   3   0  12 34460.4 3171.41   1
   3   0  15 47.3264 559.861   1
  -3   3  15 1162.98 397.422   1
   0  -3  15-397.360 683.160   1
  -3   3  18 113439. 4578.14   1
   0  -3  18 111803. 6888.21   1
  -3   3  21-161.314 349.538   1
   4  -4 -31 283.885 682.547   2
  -4   0 -28 7346.97 2744.22   2
   4  -4 -28 27524.8 4560.86   2
   4  -4 -25-779.038 962.260   2
   0   4 -25 186.861 1139.29   1
  -4   0 -25-1129.98 1699.36   2
   4  -4 -22 20435.9 3314.27   2
   0   4 -22 32189.3 4695.41   1
  -4   0 -19-1796.26 1559.08   2
   4  -4 -19-395.144 453.041   2
   0   4 -19-792.793 897.480   1
   0   4 -16 16760.7 2566.46   1
  -4   0 -16 15275.2 2887.53   2
   4  -4 -16 17828.2 2429.08   2
   4  -4 -13 71.2594 159.572   2
  -4   0 -13-296.341 847.908   2
   0   4 -13-365.313 725.316   1
   4  -4 -10 177020. 5397.34   2
  -4   0 -10 173611. 7528.76   2
  -4   0  -7 199.221 248.774   2
   4  -4  -7 353.367 209.936   2
  -4   0  -4 133368. 4454.84   2
   4  -4  -4 146680. 2691.51   1
   4  -4  -1-266.858 411.642   1
  -4   0  -1 74.8996 137.466   2
   4  -4   2 97655.8 4801.89   1
   4  -4   5 55.0773 129.073   1
   4  -4   8 254433. 9669.23   1
   0   4  11 594.196 341.409   1
  -4   0  11-57.0458 102.251   1
   4  -4  11 619.524 757.421   1
   0   4  14 4541.39 1031.69   1
  -4   0  14 4402.22 926.854   1
   4  -4  14 6976.33 1843.01   1
   0   4  17-267.799 403.075   1
  -4   0  17-69.8885 224.681   1
  -4   0  20 33873.5 3180.89   1
   0   4  20 35278.2 3518.54   1
  -1   4 -29 3538.03 1922.80   1
   4  -3 -29 148.856 558.128   2
   1   3 -29 4407.46 2027.45   1
   3  -4 -29 1389.04 1076.06   2
  -3  -1 -26 840.857 785.953   2
   1   3 -26 7239.88 2405.32   1
  -1   4 -26 10473.1 3024.92   1
  -4   1 -26-280.443 1733.67   2
   3  -4 -26 2509.02 1349.79   2
   4  -3 -26 2447.22 1344.94   2
  -1   4 -23 20571.0 3883.05   1
   1   3 -23 18165.1 3538.55   1
   4  -3 -23 11335.2 2572.05   2
   4  -3 -23 14146.5 2141.22   1
   3  -4 -23 13549.1 2914.36   2
  -4   1 -23 3920.74 719.279   1
  -3  -1 -23 6216.08 2011.34   2
  -4   1 -23 1142.49 1221.07   2
   4  -3 -20 94251.1 4973.70   1
   3  -4 -20 100775. 7045.37   2
   4  -3 -20 99350.2 7112.54   2
  -1   4 -20 144369. 9846.07   1
  -4   1 -20 51245.8 5739.62   1
  -3  -1 -20 75044.2 7150.55   2
   1   3 -20 122603. 8395.10   1
   4  -3 -17 63420.6 5105.60   2
   3  -4 -17 65103.0 5003.45   2
   1   3 -17 61189.1 4932.97   1
   4  -3 -17 53119.9 3438.18   1
  -3  -1 -17 52014.5 5409.06   2
  -1   4 -17 71028.1 6268.02   1
   3  -4 -14 17738.1 2269.46   2
  -4   1 -14 13652.7 2498.31   1
  -1   4 -14 20968.5 2937.74   1
  -3  -1 -14 16386.3 2652.39   2
   4  -3 -14 13339.1 1483.65   1
  -3  -1 -11 151733. 7119.20   2
   3  -4 -11 156493. 5765.53   2
   3  -4  -8 121670. 4099.02   2
   1   3  -8 118482. 4261.73   1
  -3  -1  -8 129213. 5602.71   2
   4  -3  -8 123091. 3969.17   2
   3  -4  -5 136066. 3485.63   2
  -3  -1  -5 149278. 4885.13   2
   4  -3  -5 146015. 2812.67   2
  -4   1  -2 113816. 3277.89   2
  -3  -1  -2 108104. 3419.43   2
   4  -3  -2 117062. 3343.42   1
   3  -4   1 51969.2 2819.96   1
   4  -3   1 51707.3 2987.07   1
   3  -4   4 63536.7 3877.93   1
   4  -3   4 69054.8 4240.22   1
  -3  -1   7 5861.96 880.562   1
  -1   4   7 7780.92 1076.66   2
   3  -4   7 3457.75 1021.31   1
   4  -3   7 5436.94 1392.37   1
   3  -4  10 80785.0 5460.83   1
  -3  -1  10 82492.3 3781.48   1
  -1   4  10 91997.1 3343.31   1
   4  -3  10 98748.3 6298.45   1
   1   3  10 87746.5 3734.63   1
  -3  -1  13 2972.18 844.419   1
  -1   4  13 3433.39 851.678   1
   4  -3  13 3446.09 1329.28   1
   3  -4  13 2465.61 1087.98   1
   1   3  13 2913.73 741.614   1
  -4   1  13 3119.15 712.514   1
  -1   4  16 111699. 5672.73   1
  -4   1  16 122780. 4895.89   1
   1   3  16 119443. 6092.74   1
  -3  -1  16 130654. 6032.42   1
  -4   1  19 21489.8 2291.78   1
  -1   4  19 21611.6 2457.77   1
  -3  -1  19 21037.3 2632.91   1
   1   3  19 19297.8 2708.53   1
  -1   4  22 2487.32 840.328   1
  -4   1  22 2308.02 880.910   1
   1   3  22 3169.17 1161.64   1
  -3  -1  22 1714.41 893.780   1
   4  -2 -30 10901.7 3083.75   2
   2  -4 -30 18812.8 4250.78   2
  -2   4 -27 4452.98 2009.52   1
  -2  -2 -27 260.612 962.121   2
   2  -4 -27 740.088 726.369   2
   2   2 -27 4496.08 1972.27   1
   4  -2 -27-978.713 1301.37   2
  -4   2 -27-2323.48 2478.50   1
  -4   2 -27 1064.29 1533.31   2
   2  -4 -24 37350.2 5007.48   2
  -4   2 -24 27038.5 4539.34   1
   2   2 -24 51446.7 5837.80   1
  -2   4 -24 63331.0 7097.46   1
  -2  -2 -24 29574.6 4922.66   2
  -4   2 -21-836.577 1415.41   1
   2  -4 -21 407.781 737.619   2
   2   2 -21 86.3394 579.302   1
  -2   4 -21 1204.24 1088.40   1
  -2  -2 -21-159.598 625.221   2
   2   2 -18 100061. 6604.48   1
   2  -4 -18 87187.4 6243.58   2
  -4   2 -18 49275.7 5670.16   1
  -2  -2 -18 84173.4 6904.65   2
  -2   4 -18 115255. 8612.13   1
   4  -2 -18 48737.8 4169.38   1
  -4   2 -15 5057.02 1622.92   1
   2  -4 -15 10736.1 1920.28   2
  -2   4 -15 10553.0 2433.61   1
   4  -2 -15 6681.10 1452.40   1
  -2  -2 -15 9405.67 2074.34   2
   4  -2 -12 55505.9 3258.93   1
  -2  -2 -12 57470.4 4440.24   2
   2   2 -12 57714.9 3394.84   1
   2  -4 -12 60831.4 3986.49   2
   2  -4  -9 162141. 5436.09   2
   2   2  -9 158522. 4846.62   1
  -2  -2  -9 172125. 6668.30   2
   2  -4  -6 699647. 9439.66   2
   4  -2  -6 697118. 5963.47   1
  -2  -2  -3 874077. 10340.5   2
   2  -4  -3 818750. 8630.23   2
   4  -2   0 5267.53 729.616   1
   2  -4   0 5493.38 747.267   1
  -4   2   0 5030.93 453.076   2
   4  -2   3 889110. 11785.0   1
  -2   4   3 824996. 8976.76   2
  -2   4   3 846731. 6922.23   1
   2  -4   3 925036. 12083.3   1
  -2   4   6 719519. 9496.69   2
  -2  -2   6 698799. 10147.8   1
   2  -4   6 721040. 13160.4   1
   2   2   9 166985. 5206.89   1
   4  -2   9 165287. 7408.75   1
   2  -4   9 147934. 6764.90   1
  -2   4   9 171601. 3877.53   1
  -2  -2   9 162742. 5533.83   1
  -2  -2  12 56723.7 3690.41   1
  -2   4  12 41653.7 2729.71   1
   2   2  12 53091.0 3399.48   1
   4  -2  12 56534.5 4783.37   1
  -4   2  12 54610.3 2366.62   1
   2  -4  12 47879.5 4198.07   1
  -2   4  15 9645.89 1370.19   1
  -2  -2  15 11820.1 1859.55   1
   2  -4  15 9116.94 1870.95   1
   4  -2  15 15155.1 2545.48   1
   2   2  15 12095.9 1923.15   1
  -4   2  15 11673.6 1288.81   1
  -2  -2  18 85152.0 5544.57   1
  -4   2  18 87017.0 4089.55   1
  -2   4  18 74622.0 4040.84   1
   2   2  18 81879.3 5709.66   1
  -4   2  21 533.409 436.256   1
  -2   4  21 384.091 256.745   1
  -4   3 -31 4385.39 1515.33   1
   4  -1 -31 510.833 1256.22   2
  -4   3 -28 46027.0 6547.45   1
   1  -4 -28 39381.0 5994.53   2
  -1  -3 -28 33778.4 5801.70   2
  -4   3 -25 24720.2 4555.51   1
  -3   4 -25 31154.8 5214.33   1
  -1  -3 -25 16879.9 3729.11   2
   4  -1 -25 16782.6 2964.53   1
   1  -4 -25 23311.7 4238.06   2
   3   1 -25 33640.8 4785.00   1
  -3   4 -22 7619.34 3016.57   1
  -1  -3 -22 1639.38 1132.01   2
   1  -4 -22 2797.52 1302.35   2
  -4   3 -22 5169.80 2109.46   1
   4  -1 -22 2836.39 1256.83   1
   3   1 -22 3739.91 1261.82   1
   1  -4 -19 19738.5 3143.74   2
  -1  -3 -19 18352.8 3255.73   2
   3   1 -19 19710.6 3056.62   1
  -3   4 -19 29462.7 4585.21   1
  -4   3 -19 23257.0 4115.37   1
   4  -1 -16 122580. 6621.56   1
  -1  -3 -16 127332. 7640.93   2
  -4   3 -16 120025. 8660.64   1
   1  -4 -16 131331. 7287.51   2
  -1  -3 -13 2699.36 1053.68   2
   1  -4 -13 2469.14 885.860   2
   4  -1 -13 1655.33 414.303   1
  -3   4 -13 1626.85 959.150   1
  -4   3 -13 2062.90 1253.94   1
   3   1 -13 2072.41 686.446   1
   3   1 -10 96361.7 3737.24   1
   4  -1 -10 99558.0 3376.59   1
  -1  -3 -10 102167. 5177.48   2
   1  -4 -10 94590.5 4630.80   2
   4  -1  -7 4835.01 635.254   1
   1  -4  -7 4792.25 872.558   2
   3   1  -7 5263.75 796.956   1
  -1  -3  -7 7178.25 1181.44   2
   1  -4  -4 75021.0 3027.56   2
  -1  -3  -4 78246.5 3329.04   2
   1  -4  -1 45940.9 2039.54   1
   4  -1  -1 42734.0 1311.61   2
   3   1  -1 45198.3 1923.58   2
  -3   4   2 113490. 2905.67   2
   4  -1   2 114204. 3644.46   1
   1  -4   2 124262. 4050.69   1
  -3   4   2 127220. 3164.17   1
   4  -1   5 161542. 5085.80   1
  -1  -3   5 146703. 4776.54   1
  -3   4   5 149597. 3813.54   2
   1  -4   5 160364. 5476.35   1
   1  -4   8 118101. 5463.06   1
  -1  -3   8 122822. 4957.76   1
   3   1   8 115033. 4410.40   1
   4  -1   8 115386. 4976.01   1
  -3   4  11 142440. 3237.08   1
   1  -4  11 140534. 6639.39   1
   3   1  11 148633. 5736.43   1
  -1  -3  11 156841. 6452.12   1
  -4   3  11 134228. 2803.64   1
   4  -1  11 144583. 6514.28   1
  -1  -3  14 16038.5 2280.88   1
   1  -4  14 11579.8 2087.51   1
  -3   4  14 15161.8 1325.44   1
  -4   3  14 14105.7 1182.38   1
   3   1  14 15727.3 2204.24   1
   4  -1  14 13560.9 2344.66   1
   3   1  17 65200.2 5064.33   1
  -3   4  17 64459.0 3164.87   1
  -1  -3  17 67394.4 5125.08   1
   1  -4  17 52285.7 4803.38   1
   4  -1  17 69018.6 5570.62   1
  -4   3  17 66255.6 3077.55   1
  -3   4  20 92447.5 4193.73   1
  -4   3  20 100115. 4348.00   1
  -4   4 -29-1677.58 1909.66   1
   0  -4 -29 131.703 928.601   2
  -4   4 -26 19198.9 4334.31   1
   0  -4 -26 11314.0 3094.08   2
   4   0 -26 20615.4 3640.65   1
   0  -4 -23 362.455 474.558   2
   4   0 -23-234.744 762.049   1
  -4   4 -23 1063.98 1154.16   1
   0  -4 -20 35336.6 4525.88   2
   4   0 -20 32727.5 4043.44   1
   0  -4 -17 196.471 329.935   2
  -4   4 -17 3217.07 1963.16   1
   0  -4 -14 5598.49 1476.14   2
  -4   4 -14 6074.33 2081.81   1
   4   0 -14 4368.60 906.573   1
   0  -4 -11 205.413 325.241   2
   4   0 -11 116.967 278.288   1
   4   0  -8 203997. 4822.49   1
   0  -4  -8 219514. 6791.79   2
   4   0  -5-97.0584 167.018   1
   0  -4  -5 42.6169 144.647   2
   4   0  -2 107492. 2672.26   2
   0  -4  -2 111700. 3653.30   2
   0  -4   1 5.77197 69.2518   1
   4   0   1-24.1578 97.7195   2
  -4   4   1 46.7849 198.517   1
   0  -4   4 137562. 4794.14   1
  -4   4   4 127799. 2926.55   2
  -4   4   4 133086. 2469.54   1
   4   0   4 133664. 4114.72   2
   0  -4   7-52.6403 149.216   1
   4   0   7 8.23885 176.700   1
   0  -4  10 186052. 7376.28   1
   4   0  10 178116. 6475.84   1
  -4   4  13 65.5075 75.9003   1
   4   0  13 370.576 489.526   1
   0  -4  13 126.434 316.280   1
   0  -4  16 11949.4 2209.99   1
   4   0  16 12019.8 2152.86   1
  -4   4  16 13209.7 1151.08   1
  -4   4  19-87.3284 218.400   1
   5  -5 -29-139.034 954.026   2
   0   5 -29 465.156 1358.64   1
  -5   0 -26 427.519 784.672   2
   5  -5 -26 4600.15 1803.13   2
   0   5 -26 7204.00 2353.14   1
  -5   0 -23-1007.43 1729.53   2
   0   5 -23-581.245 945.836   1
   5  -5 -23-57.6906 273.616   2
   5  -5 -20 4708.46 1403.07   2
  -5   0 -20 2252.00 922.800   2
   0   5 -20 5127.72 1655.23   1
  -5   0 -17-399.614 1073.97   2
   0   5 -17 232.708 379.384   1
   5  -5 -17 26.4350 412.167   2
   0   5 -14 74910.6 4582.03   1
  -5   0 -14 77266.0 6155.84   2
   5  -5 -14 88662.9 4741.90   2
   0   5 -11 460.203 314.293   1
  -5   0 -11-166.034 496.679   2
   5  -5 -11-55.7048 99.1900   2
  -5   0  -8 2321.22 815.855   2
   5  -5  -8 2077.51 480.854   2
  -5   0  -5 66.1398 294.856   2
   5  -5  -5 49.0282 96.4139   2
   5  -5  -2 209829. 5862.46   1
  -5   0  -2 263281. 5703.20   2
   5  -5   1-323.831 533.701   1
   5  -5   4 19030.9 2533.80   1
   5  -5   7 439.572 658.111   1
   5  -5  10 183818. 8893.92   1
   5  -5  13 632.615 1030.79   1
   0   5  13 116.022 161.198   1
   0   5  16 35931.6 3014.07   1
   0   5  19-310.607 651.001   1
  -5   0  19 143.130 237.749   1
  -5   0  22 20881.4 2642.30   1
   5  -4 -30 5112.79 2081.29   2
  -1   5 -30 11170.5 3314.99   1
   4  -5 -30 5633.01 2219.44   2
   4  -5 -27 1171.86 1091.70   2
   5  -4 -27 712.671 803.775   2
   1   4 -27 2245.40 1287.54   1
  -4  -1 -27 781.166 614.134   2
  -1   5 -27 2960.32 1813.25   1
   1   4 -24 81985.3 7540.96   1
   5  -4 -24 55009.2 5687.59   2
  -4  -1 -24 41495.2 6113.29   2
   4  -5 -24 61605.8 6161.42   2
  -1   5 -24 93382.9 8267.96   1
  -5   1 -21-59.1266 1097.64   2
   5  -4 -21 2871.40 1098.65   2
  -4  -1 -21 3040.78 1319.27   2
  -1   5 -21 4396.30 1498.71   1
   4  -5 -21 3707.01 1350.72   2
   1   4 -21 3076.82 941.899   1
  -4  -1 -18 68690.7 6532.26   2
   4  -5 -18 81053.1 5620.35   2
   5  -4 -18 77825.2 5422.16   2
   1   4 -18 79965.9 5524.06   1
  -5   1 -18 46432.4 5805.79   2
  -5   1 -18 47689.6 5338.97   1
  -1   5 -18 84686.4 6763.43   1
  -1   5 -15 17402.8 2541.12   1
  -5   1 -15 9088.05 2115.64   2
   5  -4 -15 18432.2 1296.47   1
   1   4 -15 15678.8 2040.24   1
  -4  -1 -15 17933.7 3009.44   2
  -5   1 -15 11890.3 2483.73   1
   5  -4 -15 16049.5 2099.81   2
   4  -5 -15 18003.8 2313.14   2
   5  -4 -12 81094.8 4002.96   2
  -4  -1 -12 80507.9 5569.97   2
  -1   5 -12 71827.9 4461.90   1
  -5   1 -12 68690.8 5612.59   2
  -5   1 -12 64713.3 5291.15   1
   4  -5 -12 78788.5 4137.76   2
   4  -5  -9 27921.3 2070.86   2
  -5   1  -9 26712.7 3058.25   2
   5  -4  -9 27197.3 1835.29   2
  -4  -1  -9 32721.2 3096.40   2
   4  -5  -6 427601. 6729.27   2
   5  -4  -6 436458. 5331.05   2
   4  -5  -3 147069. 3369.02   1
  -5   1  -3 142759. 4320.72   2
   5  -4  -3 127811. 4236.15   1
  -4  -1  -3 131997. 4323.23   2
  -5   1   0 70330.1 2292.60   2
   4  -5   0 77641.5 3562.28   1
   5  -4   0 79591.2 4175.86   1
   4  -5   3 126286. 5652.62   1
  -1   5   3 127259. 3609.95   1
   5  -4   6 220485. 9018.50   1
   4  -5   6 158969. 7268.25   1
   5  -4   9 57082.0 4964.99   1
   4  -5   9 52607.2 4516.34   1
  -1   5   9 48440.0 3126.14   2
   1   4  12 251199. 6857.75   1
  -1   5  12 253302. 6210.32   1
   1   4  15 6716.02 1241.69   1
  -4  -1  15 7453.97 1350.11   1
  -1   5  15 7616.81 1317.30   1
  -4  -1  18 33527.1 3192.73   1
   1   4  18 31108.8 3204.32   1
  -1   5  18 27380.1 2877.57   1
  -5   1  18 33687.5 2713.13   1
  -4  -1  21 4921.64 1308.06   1
   1   4  21 3815.20 1151.09   1
  -1   5  21 5219.39 1262.12   1
  -5   1  21 4419.93 1081.67   1
  -2   5 -31 20949.0 4342.94   1
   5  -3 -31 6410.46 2312.70   2
   2   3 -28 44567.5 5892.33   1
  -3  -2 -28 14817.2 3937.55   2
   5  -3 -28 18760.2 3747.30   2
   3  -5 -28 26333.0 4655.57   2
  -5   2 -28 12983.8 3910.89   2
  -2   5 -28 49793.8 6540.83   1
  -2   5 -25 59530.5 6944.61   1
  -3  -2 -25 25748.4 4822.50   2
  -5   2 -25 16868.9 3363.45   1
   2   3 -25 44590.9 5529.88   1
   5  -3 -25 26634.7 4040.48   2
   3  -5 -25 33139.6 4786.80   2
  -5   2 -25 7569.15 2865.23   2
   5  -3 -22 2415.56 881.650   1
  -2   5 -22 4309.94 1938.27   1
   2   3 -22 1832.62 382.132   1
   3  -5 -22 2929.79 1293.76   2
  -3  -2 -22 2343.51 1298.98   2
   5  -3 -22 1340.47 650.423   2
  -5   2 -19 12826.7 2826.20   1
   3  -5 -19 35661.6 3966.47   2
  -2   5 -19 43470.3 5401.62   1
   5  -3 -19 20798.5 2240.90   1
   2   3 -19 32148.6 3647.57   1
  -3  -2 -19 27969.0 4181.69   2
  -3  -2 -16 34390.1 4213.08   2
  -5   2 -16 15793.1 2947.25   1
   5  -3 -16 17751.1 2022.08   1
   3  -5 -16 37615.5 3631.80   2
  -2   5 -16 35474.2 4368.49   1
   2   3 -16 35351.8 3165.68   1
   3  -5 -13 2.64126 227.604   2
  -5   2 -13-486.254 938.326   1
  -2   5 -13 593.885 602.598   1
  -3  -2 -13 68.8496 409.710   2
   5  -3 -13-162.083 343.809   1
   5  -3 -10 137155. 3325.89   1
   3  -5 -10 126720. 4953.87   2
  -3  -2 -10 134321. 6343.66   2
   2   3 -10 125620. 4698.81   1
   2   3  -7 9378.07 1186.88   1
  -3  -2  -7 9923.16 1473.52   2
   5  -3  -7 8895.43 658.384   1
   3  -5  -7 9252.39 1144.04   2
   5  -3  -7 9628.68 944.135   2
  -3  -2  -4 69285.7 3333.48   2
   5  -3  -4 74791.8 2345.90   1
   3  -5  -4 65735.3 2588.50   2
  -5   2  -1 30289.1 1507.91   2
   3  -5  -1 32203.1 1886.04   1
   5  -3  -1 32170.6 1985.80   1
  -3  -2  -1 27669.9 1825.61   2
   5  -3   2 3382.71 777.921   1
   3  -5   2 3270.43 800.191   1
  -2   5   2 2742.00 499.798   1
   5  -3   5 131049. 5820.15   1
   3  -5   5 118865. 5563.09   1
  -2   5   5 116205. 2951.25   1
  -2   5   5 122014. 4129.83   2
  -2   5   8 298617. 7160.52   2
  -3  -2   8 291820. 7237.61   1
   5  -3  11 337785. 11794.3   1
   2   3  11 314861. 7771.31   1
  -3  -2  11 314713. 8398.92   1
  -2   5  11 326354. 6064.89   1
   2   3  14 9061.60 1486.33   1
  -3  -2  14 9504.17 1602.73   1
  -2   5  14 8312.17 1289.63   1
   3  -5  14 7411.92 1808.82   1
   5  -3  14 11218.4 2240.23   1
   2   3  17 124136. 6270.39   1
  -5   2  17 118901. 4445.05   1
  -3  -2  17 124960. 6434.83   1
  -2   5  17 114881. 5036.15   1
   2   3  20 31901.4 3653.49   1
  -3  -2  20 33523.2 3630.38   1
  -2   5  20 34912.5 2819.04   1
  -5   2  20 35368.5 2727.07   1
   5  -2 -29-1483.55 1584.36   2
  -5   3 -29-2517.73 2749.78   1
  -3   5 -29 2935.20 1835.37   1
   2  -5 -29 3296.04 1863.49   2
  -5   3 -26-1264.23 1768.69   1
   5  -2 -26 243.817 1103.23   2
   2  -5 -26 1626.01 1350.19   2
   3   2 -26 3447.89 1628.94   1
  -2  -3 -26 1703.47 1297.84   2
  -3   5 -26 4549.82 2079.48   1
  -2  -3 -23 27293.5 4674.08   2
   3   2 -23 36737.8 4702.55   1
  -5   3 -23 25937.3 4584.81   1
   2  -5 -23 28280.6 4175.69   2
  -2  -3 -20 37066.7 4901.39   2
  -5   3 -20 26310.4 4511.85   1
   5  -2 -20 24369.7 3118.02   1
   3   2 -20 35720.1 4054.37   1
   2  -5 -20 35158.8 4252.97   2
   2  -5 -17 133115. 7391.54   2
  -2  -3 -17 134112. 8400.02   2
   3   2 -17 130611. 6248.48   1
   5  -2 -17 121182. 6568.64   1
   2  -5 -14 8758.40 1672.11   2
   5  -2 -14 8250.50 1243.69   1
  -5   3 -14 3938.32 1414.55   1
  -3   5 -14 9109.23 2350.00   1
  -2  -3 -14 9620.05 1999.47   2
   3   2 -11 316795. 7386.06   1
   2  -5 -11 324104. 8839.54   2
  -2  -3 -11 339566. 10274.8   2
   5  -2  -8 292987. 4823.88   1
   3   2  -8 287967. 6503.70   1
  -2  -3  -8 311987. 8570.14   2
   2  -5  -8 295542. 7272.49   2
  -2  -3  -5 120589. 4586.01   2
   2  -5  -5 115845. 3966.57   2
  -2  -3  -2 3263.03 659.482   2
   2  -5  -2 3341.42 578.801   1
   2  -5   1 26926.7 1953.98   1
   5  -2   1 26871.0 1893.65   1
  -3   5   1 25686.6 1609.23   1
   2  -5   4 74271.9 3900.50   1
   5  -2   4 71419.8 3510.87   1
  -3   5   4 70412.6 2074.68   1
  -3   5   4 66653.1 2726.64   2
  -3   5   7 6650.25 523.139   1
   2  -5   7 8119.72 1438.29   1
  -3   5   7 7674.17 1036.05   2
   5  -2   7 6914.06 1271.71   1
  -2  -3   7 7326.93 1181.78   1
   2  -5  10 114871. 6301.03   1
  -3   5  10 111538. 3067.75   1
   3   2  10 130717. 5024.40   1
   5  -2  10 132167. 6346.36   1
  -2  -3  10 131312. 5559.12   1
   5  -2  13 260.823 235.143   1
   3   2  13 434.689 229.694   1
  -3   5  13 170.479 153.168   1
   2  -5  13-338.529 535.466   1
  -2  -3  13 129.906 335.320   1
   3   2  16 32632.9 3245.96   1
  -3   5  16 31446.6 2088.98   1
  -2  -3  16 35265.2 3533.02   1
   3   2  19 32229.4 3634.22   1
  -5   3  19 33399.5 2263.18   1
  -3   5  19 32215.6 2318.25   1
  -4   5 -30 28945.1 5345.44   1
  -5   4 -30 21230.1 4514.03   1
  -5   4 -27-459.279 1347.41   1
   1  -5 -27 3159.05 1772.80   2
  -1  -4 -27 3536.30 1968.19   2
  -4   5 -27 3685.14 2054.33   1
   4   1 -24 72512.1 6670.50   1
   5  -1 -24 65739.3 5785.98   1
  -5   4 -24 72657.7 8016.71   1
   1  -5 -24 56903.0 6400.94   2
  -1  -4 -24 56571.0 6656.72   2
  -4   5 -21 10307.6 3117.02   1
   1  -5 -21 5102.51 1739.39   2
   4   1 -21 4202.51 1383.86   1
  -1  -4 -21 6148.93 2118.47   2
  -5   4 -21 7491.91 2443.24   1
  -4   5 -18 41438.3 5593.62   1
   4   1 -18 28839.0 2992.82   1
  -1  -4 -18 31344.2 4091.43   2
   5  -1 -18 31005.5 3450.52   1
   1  -5 -18 36455.8 4115.15   2
  -5   4 -18 38202.6 5320.00   1
  -4   5 -15 8064.58 2331.59   1
  -5   4 -15 9951.44 2687.68   1
  -1  -4 -15 8951.60 1966.92   2
   1  -5 -15 7457.18 1670.55   2
   5  -1 -15 6595.86 1083.56   1
   5  -1 -12 264658. 6171.65   1
   1  -5 -12 258198. 8620.09   2
  -1  -4 -12 267288. 9272.71   2
   4   1 -12 266745. 6791.83   1
   4   1  -9 52719.1 2767.03   1
  -1  -4  -9 54669.3 3761.85   2
   1  -5  -9 56178.7 3541.26   2
   5  -1  -9 52684.8 2411.26   1
   1  -5  -6 200595. 5935.18   2
  -1  -4  -6 196304. 6140.20   2
   4   1  -6 184615. 4915.02   1
   5  -1  -3 132576. 2617.92   2
   1  -5  -3 135917. 4223.89   2
  -5   4   0 77836.4 3621.69   1
  -4   5   0 73913.3 3810.27   1
   5  -1   0 67518.6 2161.07   2
   1  -5   0 77914.6 3236.87   1
   4   1   0 67184.8 2639.31   2
   5  -1   3 139893. 4590.08   1
  -5   4   3 121986. 2062.09   2
   4   1   3 130415. 4007.94   2
  -4   5   3 130964. 3460.89   2
  -1  -4   3 133945. 4615.52   1
  -4   5   3 119490. 3855.84   1
   1  -5   3 151061. 5193.57   1
   5  -1   6 466593. 9424.19   1
  -1  -4   6 459933. 9616.63   1
   1  -5   6 485662. 10774.9   1
   5  -1   9 28655.2 2605.62   1
   4   1   9 25081.7 2258.50   1
  -1  -4   9 28760.6 2733.18   1
   1  -5   9 27651.4 2957.23   1
   1  -5  12 77152.0 5385.85   1
   5  -1  12 83968.5 5149.74   1
  -1  -4  12 83171.9 5115.58   1
   4   1  12 79887.3 4408.10   1
  -1  -4  15 14694.8 2409.38   1
  -4   5  15 13884.7 952.540   1
   5  -1  15 15104.6 2481.82   1
   4   1  15 16529.2 2328.78   1
   1  -5  15 11279.7 2221.44   1
  -4   5  18 75135.5 2782.12   1
  -5   4  18 72038.0 2726.99   1
  -5   5 -28 4074.30 1849.93   1
   0  -5 -28 5322.49 2391.64   2
  -5   5 -25 306.708 847.441   1
   5   0 -25-141.904 597.637   1
  -5   5 -22 32780.4 5476.64   1
   5   0 -22 23759.6 3554.45   1
   0  -5 -22 24985.8 4086.53   2
   0  -5 -19 929.102 923.381   2
  -5   5 -19 1828.21 1977.69   1
   0  -5 -16 34358.3 3826.71   2
  -5   5 -16 49958.5 6075.53   1
   0  -5 -13-72.9638 287.957   2
   5   0 -13 534.928 458.496   1
  -5   5 -13 423.457 497.227   1
   0  -5 -10 149296. 6360.92   2
   5   0 -10 136994. 4419.44   1
   0  -5  -7 82.5921 176.996   2
   5   0  -7 55.3655 92.5256   1
   0  -5  -4 13516.3 1497.26   2
  -5   5  -1-172.125 505.570   1
   5   0  -1 80.5335 72.3116   2
   5   0   2 244074. 5122.77   2
  -5   5   2 255000. 4164.71   2
  -5   5   5 78.1798 92.0551   2
   0  -5   5 67.2557 179.991   1
   5   0   5-133.829 170.317   1
   5   0   8 2985.92 819.076   1
   0  -5   8 2523.55 878.185   1
   0  -5  11 236.500 320.666   1
   5   0  11 652.832 414.542   1
   0  -5  14 82043.2 5790.00   1
   5   0  14 83716.8 5248.24   1
  -5   5  20 4424.76 621.673   1
   6  -6 -30 5176.85 2062.42   2
   0   6 -30 8050.93 2754.23   1
   0   6 -27 1598.45 1206.29   1
  -6   0 -27-939.696 1582.44   2
   6  -6 -27 162.411 577.149   2
   6  -6 -24 50306.7 5148.37   2
   0   6 -24 57543.1 6219.37   1
   0   6 -21-182.137 662.530   1
  -6   0 -21 430.296 690.321   2
   6  -6 -21 323.951 476.388   2
   6  -6 -18 45125.7 3841.65   2
   0   6 -18 36922.5 3733.35   1
  -6   0 -18 35581.9 4921.35   2
   6  -6 -15 100.255 429.761   2
   0   6 -15-551.080 694.603   1
  -6   0 -15 351.884 457.831   2
   0   6 -12 264090. 8062.47   1
   6  -6 -12 277255. 7113.83   2
  -6   0 -12 280882. 10987.8   2
   6  -6  -9 177.274 208.732   2
  -6   0  -9 190.467 377.123   2
   6  -6  -6 17156.5 924.435   1
  -6   0  -6 15942.3 1955.92   2
  -6   0  -3 183.231 190.306   2
   6  -6  -3 32.7212 201.053   1
  -6   0   0 812745. 9764.41   2
   6  -6   0 624583. 12886.7   1
   0   6   3-325.043 289.569   1
   6  -6   3 302.775 437.600   1
   6  -6   6 8224.40 1910.58   1
   6  -6   9 836.146 935.170   1
   0   6  12 338922. 9824.12   2
   0   6  12 319793. 7569.66   1
   0   6  15-201.939 325.402   1
   0   6  18 31825.1 2989.99   1
   0   6  21-681.046 734.209   1
  -1   6 -28 1368.60 1423.90   1
   1   5 -28 861.807 1085.04   1
   5  -6 -28 412.092 956.504   2
   6  -5 -28 1822.05 1328.31   2
   6  -5 -25 2622.16 1212.65   2
  -5  -1 -25 1288.09 1162.89   2
  -6   1 -25-540.233 1472.24   2
   5  -6 -25 3190.31 1470.41   2
  -1   6 -25 2835.87 1630.11   1
   1   5 -25 1778.24 660.072   1
   6  -5 -22 77902.3 6065.95   2
   5  -6 -22 78609.0 6222.02   2
  -1   6 -22 87448.5 7606.35   1
   1   5 -22 74896.5 6582.60   1
   1   5 -19 6432.22 1595.57   1
   5  -6 -19 7862.12 1746.57   2
  -6   1 -19 3900.70 1410.76   2
   6  -5 -19 6953.14 1587.03   2
  -5  -1 -19 6441.78 2138.33   2
  -1   6 -19 6891.11 1879.86   1
  -1   6 -16 553.732 218.690   1
  -5  -1 -16 7.48145 698.287   2
   1   5 -16 4.90043 474.129   1
   5  -6 -16 284.568 335.852   2
   6  -5 -16 411.306 355.476   2
  -6   1 -16-374.912 928.221   2
  -1   6 -13 23983.9 2557.39   1
  -5  -1 -13 32105.9 3785.16   2
   1   5 -13 25532.7 2488.45   1
   5  -6 -13 28102.3 2491.57   2
   6  -5 -13 26823.0 2351.08   2
  -6   1 -13 23853.4 3361.72   2
   1   5 -10 109321. 4735.70   1
   6  -5 -10 105746. 3694.90   2
  -6   1 -10 111251. 6331.33   2
  -5  -1 -10 121489. 6420.11   2
   5  -6 -10 105716. 4176.76   2
   6  -5  -7 55639.9 2050.83   2
  -5  -1  -7 58440.6 3818.62   2
   5  -6  -7 54110.5 2556.58   2
  -6   1  -7 63817.9 4074.05   2
   5  -6  -4 48354.6 2012.34   1
  -5  -1  -4 45229.6 2861.12   2
  -6   1  -4 45562.0 2786.02   2
  -5  -1  -1 50009.4 2636.94   2
  -6   1  -1 53784.2 2434.02   2
   5  -6  -1 52971.9 3076.60   1
   6  -5  -1 49492.2 3586.86   1
  -1   6   2 124799. 4048.22   1
   5  -6   2 118227. 5659.54   1
   5  -6   5 20532.6 2662.20   1
   6  -5   5 29520.7 3407.94   1
   6  -5   8 5099.91 1498.10   1
   5  -6   8 5462.76 1518.41   1
   5  -6  11 16475.1 2747.72   1
  -1   6  11 12965.6 1810.90   2
   6  -5  11 18881.7 2882.91   1
  -1   6  14 88813.9 3969.84   1
   1   5  14 92047.6 4482.00   1
   1   5  17 17417.3 2193.22   1
  -1   6  17 17324.6 2075.69   1
   1   5  20 4160.52 1242.51   1
  -5  -1  20 5440.06 1343.36   1
  -1   6  20 3021.95 906.922   1
  -2   6 -29 5896.30 2613.77   1
   2   4 -29 3669.49 1730.55   1
   6  -4 -29 851.295 858.942   2
   4  -6 -29 3794.17 1945.92   2
  -4  -2 -26 1854.52 1490.04   2
   4  -6 -26 4005.14 1758.18   2
   6  -4 -26 1062.04 683.632   2
  -6   2 -26 499.359 729.448   2
  -2   6 -26 3223.29 1907.08   1
   2   4 -26 3090.63 1402.02   1
   6  -4 -23 4112.14 1380.00   2
  -4  -2 -23 4913.01 2216.47   2
   4  -6 -23 6733.09 2023.25   2
   2   4 -23 4829.96 1610.02   1
  -2   6 -23 9632.57 2709.14   1
   4  -6 -20 18397.6 2887.85   2
   2   4 -20 19858.4 2841.73   1
   6  -4 -20 17793.0 2700.90   2
   6  -4 -20 19836.1 1715.68   1
  -6   2 -20 6023.35 1658.52   1
  -4  -2 -20 15995.9 3391.09   2
  -6   2 -20 3593.73 1244.53   2
  -2   6 -20 23258.3 3944.35   1
  -4  -2 -17 37103.5 4710.59   2
   6  -4 -17 34935.0 3379.17   2
   6  -4 -17 34183.2 2043.92   1
   2   4 -17 34228.9 3203.40   1
   4  -6 -17 37369.9 3631.89   2
  -2   6 -17 38604.0 4507.94   1
   4  -6 -14 7833.55 1445.45   2
  -2   6 -14 7184.25 1637.89   1
  -4  -2 -14 7439.72 1864.97   2
   6  -4 -14 4760.01 665.423   1
   2   4 -14 7397.42 1337.36   1
   6  -4 -14 7860.46 1359.30   2
  -6   2 -14 4210.19 1498.22   1
   4  -6 -11 53466.0 3370.48   2
   6  -4 -11 53502.3 2875.75   2
  -4  -2 -11 56881.0 4440.82   2
  -6   2  -8 28697.1 3145.04   2
   4  -6  -8 30583.6 2175.21   2
  -4  -2  -8 30936.5 2874.64   2
   6  -4  -8 28668.4 1573.58   2
   6  -4  -8 31561.9 1303.46   1
   6  -4  -8 28726.5 1142.65   1
   4  -6  -5 39220.6 2112.53   2
   6  -4  -5 48302.1 2103.45   1
  -4  -2  -5 43934.9 2957.52   2
  -6   2  -5 43431.5 3014.98   2
  -6   2  -2 177874. 4449.68   2
   6  -4  -2 188344. 5214.59   1
  -4  -2  -2 174041. 5262.78   2
   4  -6  -2 194845. 4872.19   1
  -2   6   1 39495.1 2152.72   1
  -6   2   1 39249.9 1417.03   2
   4  -6   1 42517.1 2834.18   1
   6  -4   1 47172.1 3165.19   1
   4  -6   4 14794.7 2030.89   1
  -2   6   4 14899.6 1576.38   2
   6  -4   4 15108.3 2087.59   1
  -2   6   4 13595.7 1165.56   1
   6  -4   7 69940.5 5034.21   1
  -2   6   7 63456.4 3403.82   2
   4  -6  10 56528.0 4920.64   1
   6  -4  10 69877.2 5652.71   1
  -2   6  13 34631.7 2207.00   1
   4  -6  13 30791.8 3927.83   1
   6  -4  13 41731.4 4468.63   1
   2   4  13 34455.3 2752.90   1
  -4  -2  13 32158.6 2887.05   1
  -2   6  16 20630.1 2167.51   1
   2   4  16 23421.5 2519.55   1
  -4  -2  16 24265.1 2754.01   1
   2   4  19 7205.65 1584.83   1
  -2   6  19 6770.98 1286.33   1
  -4  -2  19 7108.23 1571.50   1
  -3   6 -30 24614.8 4737.33   1
   3  -6 -30 18478.3 4221.35   2
   6  -3 -30 9307.60 2534.57   2
  -3  -3 -27 3506.90 2055.08   2
   3   3 -27 2576.36 1476.50   1
   3  -6 -27 2395.05 1598.10   2
  -6   3 -27-2685.93 2894.03   1
   6  -3 -27 589.923 953.093   2
  -6   3 -27 3235.42 2294.26   2
  -3   6 -27 2573.86 2093.41   1
  -3  -3 -24 33487.9 5368.42   2
  -6   3 -24 26041.4 4660.75   1
   3   3 -24 44350.3 5243.67   1
   6  -3 -24 30384.5 4241.36   2
   3  -6 -24 39722.9 5058.71   2
  -6   3 -21 935.740 1695.52   1
   6  -3 -21 3195.66 828.291   1
  -3   6 -21 8864.93 2551.24   1
   3  -6 -21 6121.76 1863.93   2
   3   3 -21 6199.84 1694.65   1
  -3  -3 -21 4841.59 2003.75   2
  -3   6 -18 69896.9 6888.68   1
  -6   3 -18 27750.6 4286.94   1
   3   3 -18 53190.7 4051.41   1
  -3  -3 -18 56013.3 5767.54   2
   6  -3 -18 28844.5 2830.81   1
   3  -6 -18 57037.1 4816.38   2
   6  -3 -15 1349.36 548.772   1
  -6   3 -15 257.027 720.758   1
   3   3 -15 1046.64 469.198   1
   3  -6 -15 1490.46 665.870   2
  -3   6 -15 455.100 295.246   1
   6  -3 -12 126363. 3724.21   1
   3  -6 -12 117433. 5488.53   2
  -3  -3 -12 124732. 6700.61   2
   6  -3  -9 25373.2 1370.70   1
   3  -6  -9 23950.6 2138.37   2
  -3  -3  -9 27726.8 2822.31   2
   3   3  -6 336705. 7409.77   1
   3  -6  -6 346056. 7272.68   2
  -3  -3  -3 109256. 4327.64   2
   6  -3  -3 121577. 3640.41   1
   3  -6  -3 111324. 3408.06   1
   6  -3   0 69083.8 3191.47   1
  -3   6   0 64388.1 2829.76   1
  -6   3   0 62182.0 1893.24   2
   3  -6   0 65867.9 3212.40   1
   3  -6   3 123954. 5219.48   1
  -3   6   3 114702. 3287.67   1
  -3   6   3 113694. 4040.49   2
   6  -3   3 118951. 4745.32   1
  -3   6   6 359641. 7472.55   2
   3  -6   6 360391. 10317.3   1
  -3   6   6 359012. 5079.70   1
  -3   6   9 25078.2 2208.29   2
  -3  -3   9 26101.1 2457.09   1
  -3   6   9 21217.9 1184.85   1
   6  -3   9 23778.7 2872.87   1
   3  -6   9 21711.2 2863.00   1
   6  -3  12 117735. 6919.66   1
   3   3  12 115609. 5064.19   1
  -3  -3  12 114449. 5657.59   1
  -3   6  12 107266. 3504.58   1
  -3  -3  15 1064.34 616.897   1
   3   3  15 1748.61 642.547   1
  -3   6  15 1259.82 448.434   1
  -3   6  18 45688.5 2665.23   1
   3   3  18 51366.6 4245.88   1
  -3  -3  18 55551.8 4684.81   1
  -6   4 -28 10408.9 2742.79   1
   2  -6 -28 12787.0 3437.78   2
   6  -2 -28 4992.16 1962.31   2
  -2  -4 -28 12006.9 3600.24   2
  -4   6 -25 15821.8 3797.91   1
   2  -6 -25 9620.92 2666.72   2
  -2  -4 -25 8853.81 2881.35   2
  -6   4 -25 7945.77 2463.49   1
   4   2 -25 8664.17 2379.04   1
  -6   4 -22 10747.6 2910.92   1
   2  -6 -22 14208.3 2952.21   2
  -4   6 -22 19278.0 3987.64   1
  -2  -4 -22 13442.4 3129.99   2
   4   2 -22 12126.1 2426.52   1
  -6   4 -19 7860.77 2503.77   1
   6  -2 -19 5508.74 1482.48   1
   2  -6 -19 6287.14 1751.55   2
  -2  -4 -19 9686.37 2411.15   2
   4   2 -19 5437.81 1209.24   1
  -4   6 -19 9528.48 2746.77   1
  -4   6 -16 31538.4 4569.50   1
  -2  -4 -16 26785.6 3596.10   2
   2  -6 -16 24676.7 3054.92   2
   4   2 -16 25965.3 2510.48   1
   6  -2 -16 22823.7 2241.87   1
  -6   4 -16 20308.3 3946.49   1
  -4   6 -13 37304.6 4623.66   1
   6  -2 -13 35437.3 2274.05   1
  -2  -4 -13 32543.2 3512.63   2
   2  -6 -13 34251.9 3226.76   2
   6  -2 -10 66634.7 2681.87   1
  -2  -4 -10 75714.5 4778.95   2
   2  -6 -10 69060.7 4015.54   2
   2  -6  -7 59413.1 3354.73   2
  -2  -4  -7 58008.0 3686.46   2
   4   2  -7 53866.4 2922.48   1
   6  -2  -4 12370.4 688.814   2
  -2  -4  -4 14786.9 1660.64   2
   2  -6  -1 35795.6 2270.85   1
   4   2  -1 34850.2 2161.26   2
   6  -2  -1 33730.2 1354.02   2
  -4   6  -1 36501.4 2509.38   1
  -6   4  -1 34674.1 2753.88   1
  -4   6   2 175141. 4606.60   2
   4   2   2 166987. 4897.90   2
  -4   6   2 193110. 4770.82   1
   6  -2   2 188530. 5518.16   1
   2  -6   2 189360. 6009.27   1
   6  -2   5 44322.4 3000.68   1
   2  -6   5 49553.6 3552.87   1
  -4   6   5 47426.1 1882.29   1
  -4   6   5 41570.6 2362.77   2
   2  -6   8 29163.9 3064.81   1
  -2  -4   8 33104.9 2819.19   1
  -4   6   8 30429.8 1093.95   1
  -4   6   8 31012.1 2245.92   2
   6  -2   8 30540.6 2781.10   1
  -2  -4  11 60989.6 4231.79   1
   6  -2  11 53686.1 4142.60   1
   2  -6  11 48279.9 4372.71   1
   4   2  11 55371.2 3596.35   1
   2  -6  14 6755.80 1685.48   1
  -2  -4  14 8715.81 1760.73   1
   6  -2  14 6629.88 1627.46   1
  -4   6  14 6938.58 587.748   1
   4   2  14 7252.89 1387.88   1
  -4   6  17 34454.4 1598.81   1
  -4   6  20 17015.0 1332.43   1
  -6   5 -29-1851.52 1954.77   1
  -5   6 -29 6595.72 2716.86   1
  -1  -5 -26 22924.8 4458.64   2
  -5   6 -26 29126.1 5307.96   1
  -6   5 -26 25129.7 4971.39   1
   1  -6 -26 19755.3 4049.92   2
   6  -1 -23 7547.13 1984.27   1
  -5   6 -23 15333.8 3698.09   1
   1  -6 -23 9861.54 2583.08   2
  -1  -5 -23 8853.37 2781.48   2
   5   1 -23 7374.39 1838.06   1
  -6   5 -23 8627.15 2791.30   1
  -5   6 -20 13045.9 3414.51   1
   1  -6 -20 6320.72 1941.48   2
  -6   5 -20 8036.05 2791.37   1
   5   1 -20 5533.11 1308.76   1
  -1  -5 -20 7399.89 2167.16   2
  -5   6 -17 31537.0 4823.08   1
  -6   5 -17 30570.1 4809.02   1
   1  -6 -17 19400.4 2906.61   2
   5   1 -17 20118.9 2241.22   1
  -1  -5 -17 22344.4 3335.09   2
   6  -1 -17 18662.1 2071.50   1
   1  -6 -14 90864.0 5745.29   2
  -6   5 -14 99448.8 8139.00   1
  -1  -5 -14 96337.0 6140.78   2
   6  -1 -14 99195.4 4197.78   1
   5   1 -11 11557.7 1420.51   1
  -1  -5 -11 11361.0 1906.03   2
   1  -6 -11 13085.3 1907.64   2
   6  -1 -11 11850.8 1276.48   1
   5   1  -8 4105.10 776.232   1
   1  -6  -8 4917.07 1048.56   2
   6  -1  -8 4393.80 763.572   1
  -1  -5  -8 6114.80 1227.98   2
  -1  -5  -5 23917.0 2202.77   2
   1  -6  -5 22412.0 2015.22   2
  -5   6  -2 120867. 6511.30   1
   6  -1  -2 122844. 2913.30   2
  -6   5  -2 110769. 5634.21   1
   6  -1   1 46462.7 2119.58   2
   1  -6   1 49029.9 3014.27   1
   5   1   1 43309.1 2340.90   2
  -6   5   1 50468.0 3003.76   1
  -5   6   4 39521.7 2016.93   2
   5   1   4 37882.3 2381.87   2
  -6   5   4 39009.7 1427.20   2
   6  -1   4 43088.4 2812.12   1
  -1  -5   4 41363.7 2949.49   1
   1  -6   4 46773.9 3286.69   1
  -5   6   7 57454.1 2777.33   2
   6  -1   7 55109.6 3588.35   1
  -1  -5   7 59950.3 3929.92   1
   1  -6   7 59009.7 4152.43   1
   5   1   7 50711.3 3220.15   1
   5   1   7 54891.4 3380.90   2
   1  -6  10 117986. 6615.60   1
  -1  -5  10 114069. 5954.00   1
   5   1  10 112618. 5104.63   1
   6  -1  10 113234. 5422.03   1
   6  -1  13 27159.8 3032.10   1
   1  -6  13 26872.0 3395.80   1
  -1  -5  13 32771.4 3542.62   1
   5   1  13 27270.8 2739.40   1
   0  -6 -27-2646.31 2002.37   2
  -6   6 -27 17.0617 759.624   1
   6   0 -24 54268.0 5437.76   1
   0  -6 -24 49719.4 6119.80   2
   6   0 -21 655.357 444.813   1
   0  -6 -21-281.657 881.679   2
   0  -6 -18 33179.4 4101.73   2
  -6   6 -18 50947.4 6379.33   1
  -6   6 -15 1589.49 1367.79   1
   0  -6 -15-631.735 726.398   2
   0  -6 -12 324637. 10368.3   2
   6   0 -12 314901. 7400.03   1
   6   0  -9-178.738 301.724   1
   0  -6  -9 175.504 280.513   2
   0  -6  -6 11785.7 1618.07   2
  -6   6  -3 310.138 317.471   1
   6   0  -3-92.8821 155.043   2
   6   0   0 785053. 9207.09   2
  -6   6   0 607248. 12950.9   1
   0  -6   3 369.498 341.605   1
  -6   6   3 23.2992 274.539   1
   6   0   3 13.4200 175.727   2
  -6   6   3 203.682 140.727   2
   6   0   6 9532.01 1431.39   1
  -6   6   6 8765.09 961.880   2
   0  -6   6 9461.78 1574.46   1
   0  -6   9 95.1812 476.313   1
   6   0   9 124.577 201.650   1
   6   0  12 268115. 8640.26   1
   0  -6  12 281257. 10613.0   1
   0   7 -28 133.527 645.136   1
  -7   0 -25-1027.98 1563.63   2
   7  -7 -25 1216.68 776.460   2
   0   7 -25-76.7874 747.262   1
   7  -7 -22 86403.0 6080.32   2
   0   7 -22 72107.0 6326.82   1
   7  -7 -19-141.479 492.720   2
  -7   0 -19-167.030 571.770   2
   0   7 -19-1405.24 952.998   1
  -7   0 -16 17117.9 3274.93   2
   7  -7 -16 18604.5 2180.98   2
   0   7 -16 14533.4 2156.30   1
   7  -7 -13 80.9580 152.404   2
   0   7 -13-16.1585 283.370   1
  -7   0 -13 117.049 651.492   2
   7  -7 -10 16288.0 1500.62   2
  -7   0 -10 19214.6 2686.20   2
   0   7 -10 16534.2 1957.44   1
   7  -7  -7 41.2440 75.7927   1
  -7   0  -7 626.121 400.037   2
  -7   0  -4 52258.2 3261.85   2
   7  -7  -4 49034.5 2782.03   1
   7  -7  -1-151.212 439.473   1
  -7   0  -1 198.325 177.584   2
   0   7   2 129357. 4791.02   1
   7  -7   2 133933. 6896.68   1
   7  -7   5 693.539 902.773   1
   7  -7   8 123275. 7530.38   1
   0   7   8 78186.3 4512.04   2
   0   7  11-195.211 331.485   2
   0   7  14 235750. 7126.02   1
   0   7  17 475.519 283.961   1
   0   7  20 7072.15 1524.94   1
   1   6 -29 12432.2 3201.11   1
   6  -7 -29 4168.33 1489.74   2
  -1   7 -29 10156.3 2905.93   1
  -6  -1 -26 7198.83 2729.72   2
   1   6 -26 15547.4 3315.91   1
  -1   7 -26 18970.2 3888.54   1
   6  -7 -26 16295.0 3201.72   2
   7  -6 -26 14470.2 2895.11   2
   6  -7 -23 10507.8 2268.41   2
   7  -6 -23 10046.7 2171.14   2
  -7   1 -23 3174.92 1209.79   2
   1   6 -23 9322.55 2266.03   1
  -1   7 -23 9830.55 2569.75   1
  -6  -1 -23 8546.80 2863.41   2
  -7   1 -20 4318.00 1813.54   2
  -1   7 -20 10876.1 2330.64   1
   7  -6 -20 12377.7 2128.70   2
   6  -7 -20 11783.0 2188.76   2
   1   6 -20 10775.3 2010.63   1
  -6  -1 -20 9665.70 2737.96   2
   7  -6 -17 12981.2 1894.08   2
  -6  -1 -17 13141.9 2920.78   2
   1   6 -17 10686.3 1795.07   1
  -7   1 -17 9719.33 2527.90   2
   6  -7 -17 13082.7 2018.06   2
  -1   7 -17 10100.5 1973.77   1
  -1   7 -14 180778. 7288.60   1
   1   6 -14 183373. 6996.91   1
   6  -7 -14 201021. 6970.95   2
  -6  -1 -14 207242. 10226.4   2
   7  -6 -14 198160. 6247.78   2
  -7   1 -14 177341. 9692.97   2
  -6  -1 -11 4736.87 1439.59   2
   1   6 -11 4705.29 1020.55   1
   6  -7 -11 4513.55 889.507   2
   7  -6 -11 4739.54 816.365   2
  -7   1 -11 3723.32 1207.62   2
  -1   7 -11 4926.17 1126.91   1
   6  -7  -8 46805.4 2466.84   2
  -6  -1  -8 51943.7 3940.32   2
  -7   1  -8 54529.9 4109.51   2
   7  -6  -8 46737.5 1971.55   2
   6  -7  -5 12409.4 1043.79   1
  -6  -1  -5 11623.7 1604.59   2
  -7   1  -5 12833.9 1675.60   2
  -6  -1  -2 167120. 5428.25   2
   6  -7  -2 168304. 5523.24   1
   7  -6  -2 154808. 6613.44   1
  -7   1  -2 155110. 4840.55   2
   6  -7   1 27446.7 2791.63   1
  -1   7   1 30792.7 2204.42   1
  -1   7   4 43067.3 2544.12   1
   6  -7   4 37825.8 3742.35   1
   6  -7   7 50771.3 4811.84   1
   7  -6   7 72868.9 5566.46   1
  -1   7  10 42706.0 3345.41   2
   6  -7  10 53837.4 5132.06   1
   7  -6  10 57698.7 5176.58   1
   1   6  13 38852.2 2884.61   1
  -1   7  13 44661.7 3732.59   2
  -1   7  13 41572.3 2705.94   1
  -1   7  16 3179.63 794.483   1
   1   6  16 3747.59 941.338   1
   1   6  19 18858.5 2466.09   1
  -1   7  19 15692.1 2126.16   1
   5  -7 -30 9442.25 2507.82   2
   5  -7 -27 5219.28 1899.70   2
   2   5 -27 5334.80 1959.86   1
   7  -5 -27 6535.58 2005.67   2
  -2   7 -27 7145.10 2476.51   1
  -5  -2 -27 4632.30 2310.81   2
  -7   2 -27 1433.53 402.071   2
   7  -5 -24 31669.8 4027.95   2
  -2   7 -24 43264.9 5695.57   1
   5  -7 -24 33662.6 4304.62   2
  -5  -2 -24 27041.7 5000.30   2
   2   5 -24 32336.8 4366.81   1
  -2   7 -21 24976.9 4008.02   1
   5  -7 -21 26663.9 3528.72   2
  -5  -2 -21 22770.1 4328.74   2
   2   5 -21 24341.9 3221.53   1
   7  -5 -21 28777.6 3397.37   2
  -2   7 -18 66546.5 5807.80   1
  -5  -2 -18 67537.7 6611.86   2
   7  -5 -18 71674.3 4778.36   2
   5  -7 -18 68828.1 4993.72   2
   2   5 -18 58644.2 4320.87   1
   7  -5 -15 55333.1 3572.01   2
  -5  -2 -15 57424.0 5515.52   2
   2   5 -15 53143.5 3765.69   1
   5  -7 -15 55688.4 4005.89   2
  -2   7 -15 47166.8 4226.97   1
  -5  -2 -12 159384. 8008.20   2
   5  -7 -12 145263. 5628.98   2
   2   5 -12 137455. 5582.15   1
   7  -5 -12 146213. 4753.54   2
  -2   7 -12 140951. 6321.13   1
  -7   2 -12 123803. 7895.44   2
  -7   2  -9 77916.9 5286.21   2
   7  -5  -9 73753.6 2550.72   2
  -5  -2  -9 79885.5 5029.70   2
   2   5  -9 73531.3 3878.12   1
   5  -7  -9 68965.7 3443.27   2
  -5  -2  -6 62703.4 3908.77   2
   7  -5  -6 65252.5 2941.03   1
  -7   2  -6 63029.0 3961.09   2
   5  -7  -3 72027.7 3045.14   1
   7  -5  -3 70886.1 3681.07   1
  -5  -2  -3 65680.1 3569.86   2
  -7   2  -3 65281.5 3117.76   2
  -2   7   0 460081. 8248.72   1
  -7   2   0 476940. 6495.78   2
   7  -5   0 539238. 11530.6   1
   5  -7   0 521168. 10305.8   1
   7  -5   3 14540.9 2197.45   1
  -2   7   3 14142.4 1688.14   2
   5  -7   3 12714.1 1986.50   1
  -2   7   3 11268.3 1208.86   1
   7  -5   6 59528.8 4752.17   1
  -2   7   6 53843.4 2607.22   1
  -2   7   6 60153.1 3570.41   2
   7  -5   9 42582.3 4412.46   1
   5  -7   9 28348.5 3560.23   1
  -2   7  12 149743. 4582.22   1
   2   5  12 147515. 5658.71   1
  -2   7  12 158700. 6694.81   2
   2   5  12 160391. 6918.67   2
   5  -7  12 141988. 8641.63   1
  -2   7  15 29994.7 2288.88   1
   2   5  15 28399.6 2672.20   1
  -2   7  18 51571.4 3630.39   1
   2   5  18 56394.1 4130.71   1
   3   4 -28 16493.3 3470.33   1
   4  -7 -28 10745.0 2731.00   2
   7  -4 -28 10461.7 2650.41   2
  -4  -3 -25 3727.65 2104.23   2
   4  -7 -25 156.911 441.305   2
  -3   7 -25 4717.33 2175.87   1
   7  -4 -25 1032.11 659.594   2
   3   4 -25-467.273 729.214   1
  -7   3 -25-309.641 719.192   2
   4  -7 -22 15725.6 2842.60   2
  -3   7 -22 19653.1 3788.01   1
   7  -4 -22 13974.4 2501.14   2
  -7   3 -22 3359.63 1564.75   2
  -4  -3 -22 12417.2 3237.21   2
   3   4 -22 14536.2 2547.14   1
   4  -7 -19 1642.12 753.251   2
  -3   7 -19 2408.80 1285.93   1
   7  -4 -19 1158.72 433.145   1
  -4  -3 -19 2911.88 1576.05   2
  -7   3 -19-1280.13 2237.74   1
   3   4 -19 779.760 319.917   1
   7  -4 -19 2249.54 926.406   2
  -4  -3 -16 38265.5 4502.92   2
   4  -7 -16 31675.5 3312.65   2
  -7   3 -16 13878.8 2798.09   1
   3   4 -16 31418.8 2909.70   1
   7  -4 -16 31463.1 3002.99   2
  -3   7 -16 29755.0 4008.22   1
   7  -4 -16 14332.4 1528.42   1
   7  -4 -13 19127.7 1939.61   2
   4  -7 -13 18480.8 2224.70   2
  -4  -3 -13 21719.2 3049.15   2
   3   4 -13 17605.6 1991.86   1
  -3   7 -13 18319.5 2664.98   1
  -7   3 -13 11109.5 2480.85   1
   7  -4 -13 15977.1 1323.86   1
   7  -4 -10 40646.3 2135.11   2
   7  -4 -10 41291.5 1688.11   1
   4  -7 -10 39648.6 2874.91   2
  -4  -3 -10 45283.8 3915.68   2
   3   4 -10 37309.7 2730.06   1
  -4  -3  -7 72686.9 4314.66   2
   7  -4  -7 60862.9 1574.30   2
   4  -7  -7 69563.6 3372.52   2
  -4  -3  -4 34373.4 2700.43   2
   4  -7  -4 33777.7 1929.13   1
   7  -4  -4 37845.3 2202.73   1
  -7   3  -4 36313.7 2664.62   2
   4  -7  -1 75884.7 3582.71   1
   7  -4  -1 75351.5 3547.57   1
  -3   7  -1 73944.1 3347.06   1
  -7   3  -1 74412.1 2611.36   2
  -3   7   2 41794.3 2722.88   2
   4  -7   2 44986.3 3284.63   1
   7  -4   2 42345.8 3065.40   1
  -3   7   2 42958.7 2307.73   1
   4  -7   5 33630.7 3225.32   1
   7  -4   5 41458.2 3454.56   1
  -3   7   5 33731.5 2479.15   2
  -3   7   5 35115.7 1912.15   1
   4  -7   8 20944.8 2866.61   1
   7  -4   8 27486.5 3103.50   1
  -3   7   8 28316.5 2403.56   2
  -3   7   8 24265.5 1501.33   1
  -3   7  11 21169.7 1458.02   1
   7  -4  11 18613.1 2860.68   1
   4  -7  11 14398.6 2510.57   1
   3   4  11 19746.4 2063.79   1
  -4  -3  14 10690.3 1811.14   1
   3   4  14 10450.4 1658.10   1
  -3   7  14 12362.9 1348.92   1
   3   4  17 5224.43 1247.36   1
  -4  -3  17 4951.75 1367.50   1
  -3   7  17 5423.54 998.939   1
  -4   7 -29 2521.07 1859.62   1
   3  -7 -29-2002.39 1635.17   2
   7  -3 -29-474.848 919.241   2
   3  -7 -26 855.291 412.208   2
  -3  -4 -26 5228.00 2358.14   2
  -4   7 -26 4097.55 2512.72   1
   7  -3 -26 845.495 693.773   2
  -7   4 -26 5327.13 2840.48   2
  -7   4 -26-1899.98 2515.73   1
   4   3 -26 2040.87 794.516   1
   7  -3 -23 1436.35 742.378   2
  -4   7 -23 5625.38 2211.83   1
   3  -7 -23 1475.08 582.687   2
   4   3 -23 1051.43 630.434   1
  -3  -4 -23 5370.49 2263.54   2
  -7   4 -23-694.231 1956.22   1
  -3  -4 -20 21879.1 3824.10   2
   3  -7 -20 21446.2 3249.74   2
  -7   4 -20 14382.0 3155.25   1
   7  -3 -20 13211.5 1985.99   1
  -4   7 -20 26359.6 4510.64   1
   4   3 -20 18015.3 2453.99   1
  -4   7 -17 7936.22 2382.82   1
   4   3 -17 5962.85 1271.47   1
   3  -7 -17 6393.10 1577.90   2
  -3  -4 -17 7089.98 2053.01   2
  -7   4 -17 2181.16 404.893   1
   7  -3 -17 6035.78 1294.17   1
  -7   4 -14 5689.70 1701.29   1
   3  -7 -14 9991.23 1795.79   2
   4   3 -14 9692.38 1482.20   1
  -4   7 -14 9367.29 2250.27   1
  -3  -4 -14 11868.7 2262.11   2
   7  -3 -14 11383.7 1252.72   1
   7  -3 -11 18552.0 1391.71   1
  -3  -4 -11 15742.0 2397.79   2
   3  -7 -11 17523.4 2110.99   2
   7  -3  -8 25331.2 1609.07   1
  -3  -4  -8 27400.6 2754.88   2
   3  -7  -8 25838.9 2293.69   2
  -3  -4  -5 36842.6 2901.31   2
   7  -3  -2 40733.8 2430.06   1
  -4   7  -2 39155.9 2657.49   1
   4   3  -2 38620.2 2517.01   2
   3  -7  -2 40387.5 2459.10   1
   7  -3   1 87209.0 3942.40   1
  -4   7   1 84434.1 3444.48   1
   3  -7   1 88610.8 4282.32   1
  -4   7   4 36327.0 2425.86   2
  -4   7   4 37095.4 1963.57   1
   3  -7   4 42211.9 3403.42   1
   7  -3   4 39708.7 3003.23   1
  -4   7   7 74021.1 3614.59   2
   7  -3   7 73798.9 4437.02   1
  -4   7   7 73162.9 2316.92   1
   3  -7   7 74847.1 5101.75   1
  -4   7  10 38124.3 1461.22   1
   3  -7  10 34597.3 3783.36   1
   7  -3  10 40940.6 3819.13   1
  -4   7  10 40855.6 1618.20   1
   4   3  10 40701.0 2988.87   1
  -4   7  10 42230.1 3041.62   2
  -3  -4  10 40085.4 3332.08   1
   4   3  13 18911.7 2193.45   1
  -3  -4  13 19708.1 2591.17   1
  -4   7  13 15707.1 891.283   1
  -4   7  16 27568.8 1442.15   1
   4   3  16 30591.8 3037.68   1
  -4   7  19 2038.60 415.971   1
  -7   5 -27 15022.2 3909.99   1
   2  -7 -27 13486.3 3143.52   2
  -2  -5 -27 13492.2 3477.29   2
   7  -2 -27 7952.02 2265.42   2
   2  -7 -24 36882.8 4978.57   2
  -2  -5 -24 37656.5 5656.63   2
  -7   5 -24 44778.9 6546.31   1
   5   2 -24 37819.0 4575.40   1
   2  -7 -21 20745.4 3366.52   2
  -2  -5 -21 21577.7 3772.15   2
  -5   7 -21 31639.4 5152.13   1
   5   2 -21 18450.4 2573.31   1
  -7   5 -21 23625.7 4620.96   1
   2  -7 -18 70920.6 5718.70   2
  -5   7 -18 85667.8 7904.98   1
  -2  -5 -18 68740.3 6171.08   2
   5   2 -18 65097.2 4249.02   1
  -7   5 -18 73388.3 7881.40   1
   7  -2 -18 65243.6 4133.04   1
  -7   5 -15 28701.6 4503.37   1
   5   2 -15 28776.6 2551.57   1
  -5   7 -15 39944.9 5205.36   1
  -2  -5 -15 31841.4 3829.88   2
   2  -7 -15 31773.5 3401.82   2
   7  -2 -15 33088.2 2429.08   1
  -5   7 -12 149623. 9329.44   1
   7  -2 -12 144160. 4413.50   1
   2  -7 -12 135228. 6301.79   2
  -2  -5 -12 152185. 7545.15   2
   7  -2  -9 38228.7 2251.04   1
  -2  -5  -9 42569.3 3570.27   2
   2  -7  -9 36297.7 2993.34   2
  -2  -5  -6 62805.0 3892.35   2
   2  -7  -6 60190.9 3420.51   2
   5   2  -3 12532.1 1352.11   2
  -7   5  -3 13405.2 2082.44   1
  -2  -5  -3 13381.6 1615.73   2
  -5   7  -3 15706.0 2144.29   1
   7  -2  -3 12316.8 786.889   2
   2  -7   0 500270. 9778.09   1
  -7   5   0 489636. 10364.4   1
  -5   7   0 485949. 10089.3   1
   7  -2   3 67342.2 3611.85   1
  -5   7   3 62857.8 2979.11   2
  -5   7   3 68219.8 3220.53   1
   2  -7   3 73487.2 4280.63   1
   2  -7   6 71566.5 4711.28   1
   7  -2   6 66970.5 4039.74   1
  -5   7   6 64469.1 3083.91   2
  -5   7   6 60849.6 2480.94   1
   5   2   6 63584.5 3485.62   2
   2  -7   9 80109.7 5576.89   1
   7  -2   9 80042.3 4688.15   1
  -2  -5   9 82378.0 4930.65   1
  -5   7   9 78371.8 3834.24   2
   5   2   9 74450.7 4143.84   1
   5   2   9 78770.7 4424.96   2
   2  -7  12 139526. 8042.58   1
   7  -2  12 133428. 6836.18   1
   5   2  12 143544. 6142.30   1
  -2  -5  12 153707. 7394.90   1
  -7   6 -28-204.995 1760.77   1
   1  -7 -28-166.677 1244.18   2
  -6   7 -28 1551.08 1367.36   1
   1  -7 -25 2740.42 1248.72   2
  -1  -6 -25 1726.34 962.509   2
  -1  -6 -22 84742.6 7749.82   2
   1  -7 -22 83741.1 7339.63   2
   6   1 -22 80375.0 5618.20   1
   7  -1 -22 81127.2 6032.71   1
  -1  -6 -19 19286.9 3314.88   2
   1  -7 -19 20760.9 3315.30   2
   6   1 -19 18327.5 2200.84   1
  -6   7 -19 33737.8 5193.08   1
  -7   6 -19 29085.9 5024.30   1
  -7   6 -16 5903.13 2230.67   1
  -6   7 -16 4641.95 1887.41   1
  -1  -6 -16 3733.37 1287.95   2
   6   1 -16 2777.85 843.988   1
   1  -7 -16 2710.48 1016.53   2
   7  -1 -13 39999.4 2591.51   1
   1  -7 -13 42316.4 3793.73   2
  -1  -6 -13 40696.6 3954.89   2
  -7   6 -13 49318.5 5851.06   1
  -6   7 -13 50276.7 5707.34   1
   1  -7 -10 40914.0 3441.68   2
  -1  -6 -10 41483.0 3645.31   2
   7  -1 -10 37608.2 2439.85   1
  -1  -6  -7 53012.8 3692.78   2
   1  -7  -7 54478.9 3623.20   2
  -6   7  -4 55084.6 4917.06   1
  -1  -6  -4 48742.9 3188.11   2
   7  -1  -4 50710.0 2075.67   2
   6   1  -4 49723.3 2579.82   2
  -7   6  -1 32207.8 3007.67   1
  -6   7  -1 32794.8 3383.10   1
   6   1  -1 32879.0 2118.02   2
   7  -1  -1 33996.8 1734.63   2
  -6   7   2 150278. 4229.93   2
  -7   6   2 164645. 5386.77   1
   6   1   2 146379. 4625.72   2
   7  -1   2 147388. 4274.42   2
   1  -7   2 166482. 6250.25   1
  -7   6   2 146120. 3073.81   2
  -6   7   5 15470.9 1388.46   2
  -6   7   5 12800.6 1345.69   1
   6   1   5 14060.2 1573.83   2
  -1  -6   5 16979.7 2106.50   1
   1  -7   5 17500.6 2287.70   1
   7  -1   5 17480.2 1959.82   1
  -7   6   5 14742.3 1027.96   2
   7  -1   8 58464.8 3823.61   1
  -1  -6   8 61177.5 4433.58   1
   6   1   8 57610.9 3678.45   1
  -6   7   8 55967.8 2949.49   2
   1  -7   8 59698.5 4616.71   1
   6   1  11 3459.87 931.667   1
  -1  -6  11 3838.97 1202.69   1
   7  -1  11 4878.07 1219.24   1
   1  -7  11 4315.29 1305.33   1
   0  -7 -26 12715.2 3286.33   2
  -7   7 -26 22370.7 4797.30   1
   7   0 -23-315.333 716.001   1
  -7   7 -23 731.538 1052.81   1
   0  -7 -23-572.479 1011.86   2
   7   0 -20 7732.07 1462.32   1
   0  -7 -20 8965.25 2290.01   2
   0  -7 -17-71.2790 389.084   2
   7   0 -17 394.926 396.182   1
   0  -7 -14 240836. 9815.91   2
  -7   7 -14 312601. 14928.6   1
   0  -7 -11-243.801 430.660   2
  -7   7 -11 607.300 1004.76   1
  -7   7  -8 90731.1 7233.10   1
   0  -7  -8 74759.4 4553.13   2
   0  -7  -5 427.345 404.964   2
  -7   7  -5 342.261 418.362   1
   7   0  -5 117.941 120.385   2
  -7   7  -2 103792. 6336.47   1
   7   0  -2 113851. 3632.44   2
  -7   7   1-136.268 433.441   1
   7   0   1 74.9874 92.7579   2
   7   0   4 45957.0 2743.22   2
  -7   7   4 49402.7 2169.03   2
  -7   7   4 52079.3 2762.93   1
   0  -7   4 54110.4 3832.24   1
   0  -7   7 80.6658 154.977   1
   7   0   7 48.7714 140.876   1
  -7   7   7 239.485 161.614   2
   7   0  10 18026.0 2262.33   1
   0  -7  10 20530.9 2891.32   1
   0   8 -26 9510.32 2482.78   1
   8  -8 -23-306.897 615.281   2
   0   8 -23-507.939 564.673   1
  -8   0 -23-770.164 669.337   2
  -8   0 -20 6369.29 2432.89   2
   0   8 -20 8596.31 1888.14   1
   8  -8 -20 11339.6 1973.32   2
   0   8 -17 286.723 383.166   1
   8  -8 -17-32.9862 350.744   2
  -8   0 -17 366.325 838.199   2
  -8   0 -14 82741.6 6801.65   2
   0   8 -14 78162.1 4784.09   1
   8  -8 -14 83028.1 4074.27   2
   8  -8 -11-69.0687 252.183   2
   0   8 -11 4.34333 177.258   1
  -8   0  -8 11019.2 1926.12   2
   0   8  -8 9666.02 1485.14   1
   8  -8  -5 707.623 506.132   1
  -8   0  -5 267.922 171.825   2
   0   8  -2 9853.78 1427.82   1
  -8   0  -2 10419.3 1436.44   2
   8  -8  -2 8314.36 1451.67   1
   8  -8   1 60.6072 298.333   1
   0   8   1-9.36558 271.083   1
   8  -8   4 183753. 8795.89   1
   0   8   4 133661. 5188.07   1
   8  -8   7 1165.06 1216.68   1
   0   8   7 39.2224 204.468   2
   0   8  16 59488.1 3809.78   1
   0   8  19-259.666 483.781   1
  -1   8 -27 4265.51 1857.77   1
   7  -8 -27 2665.26 957.668   2
   1   7 -27 1919.87 1043.68   1
   8  -7 -24 12774.0 2421.60   2
  -8   1 -24 3072.43 1562.71   2
  -7  -1 -24 6663.84 2624.34   2
   7  -8 -24 12262.5 2462.15   2
   1   7 -24 8356.33 2240.33   1
  -1   8 -24 9120.29 2491.15   1
   1   7 -21 4344.61 1268.05   1
  -1   8 -21 5589.69 1679.45   1
   7  -8 -21 5266.20 1450.26   2
   8  -7 -21 5674.78 1429.80   2
  -7  -1 -21 6869.04 2567.30   2
  -8   1 -21 2685.35 1451.37   2
  -7  -1 -18 67690.1 6886.01   2
   8  -7 -18 74200.4 4552.26   2
   7  -8 -18 74382.4 4887.08   2
  -8   1 -18 51118.2 6146.20   2
   1   7 -18 62688.2 4548.54   1
  -1   8 -18 61066.4 4921.17   1
  -7  -1 -15 22342.5 3649.66   2
   7  -8 -15 20339.1 2219.85   2
   8  -7 -15 19817.2 2037.81   2
   1   7 -15 18599.2 2355.49   1
  -8   1 -15 16917.1 3256.12   2
  -1   8 -15 18128.4 2361.45   1
  -8   1 -12 152236. 8617.96   2
  -1   8 -12 141134. 6217.66   1
   8  -7 -12 150369. 4661.93   2
   1   7 -12 143385. 6040.14   1
  -7  -1 -12 161113. 8501.60   2
   7  -8 -12 148805. 5294.70   2
   1   7  -9 38995.8 2978.82   1
  -7  -1  -9 43548.5 3967.65   2
  -1   8  -9 39443.4 3048.93   1
   7  -8  -9 36017.2 2211.43   2
   8  -7  -9 37088.4 1799.40   2
  -8   1  -9 42800.1 3940.00   2
   8  -7  -6 12223.5 1283.50   1
  -7  -1  -6 14520.0 2035.12   2
  -8   1  -6 16260.3 2083.04   2
   7  -8  -6 16782.2 1217.87   1
  -7  -1  -3 14195.6 1746.50   2
   7  -8  -3 14534.2 1624.23   1
  -8   1  -3 14526.0 1632.77   2
   8  -7  -3 8807.53 1457.04   1
  -1   8   0 475128. 9366.52   1
   1   7   0 488480. 10029.3   1
  -8   1   0 498363. 7994.68   2
  -1   8   3 953.817 336.505   1
   8  -7   3 1160.83 763.929   1
   1   7   3 766.864 420.087   1
   7  -8   3 84.3948 614.090   1
  -1   8   6 40836.7 3313.06   2
   7  -8   6 37435.3 4136.95   1
  -1   8   6 33259.1 2389.60   1
  -1   8   9 8205.37 1484.15   2
   7  -8   9 10946.1 2407.00   1
   8  -7   9 14207.9 2721.87   1
   1   7   9 8355.44 1544.12   2
   1   7  15 17615.7 2092.86   1
  -1   8  15 18609.5 1984.20   1
  -1   8  18 89914.1 4719.82   1
   1   7  18 89436.0 4976.92   1
   2   6 -28 2027.62 1231.39   1
  -2   8 -28 2729.90 2037.43   1
   6  -8 -28 1252.25 565.997   2
  -2   8 -25 2564.15 1480.57   1
   6  -8 -25 3188.44 1245.84   2
   2   6 -25 2026.77 945.646   1
   8  -6 -25 2995.03 1197.36   2
  -8   2 -25-338.323 1535.24   2
  -6  -2 -25 2109.13 1752.47   2
   2   6 -22 14902.4 2577.96   1
   8  -6 -22 19890.4 2787.19   2
   6  -8 -22 20071.9 3045.57   2
  -6  -2 -22 16401.6 3811.97   2
  -2   8 -22 14793.6 3085.61   1
   2   6 -19 4406.56 1148.75   1
  -6  -2 -19 5902.10 2233.43   2
   8  -6 -19 6390.00 1426.39   2
  -8   2 -19 2417.42 1099.28   2
  -2   8 -19 6686.91 1933.04   1
   6  -8 -19 5299.47 1391.81   2
   2   6 -16 46637.2 3682.36   1
  -6  -2 -16 54304.7 5623.93   2
   8  -6 -16 52170.7 3425.88   2
  -2   8 -16 46790.9 4184.77   1
   6  -8 -16 51320.2 3867.13   2
   6  -8 -13 27294.2 2546.69   2
  -6  -2 -13 29433.5 3748.02   2
  -2   8 -13 22581.7 2618.94   1
  -8   2 -13 23890.5 3512.93   2
   2   6 -13 29024.3 2719.21   1
   8  -6 -13 26747.2 2016.26   2
  -2   8 -10 28896.7 2773.21   1
  -6  -2 -10 34745.5 3687.22   2
  -8   2 -10 29511.6 3447.07   2
   6  -8 -10 29647.2 2313.30   2
   8  -6 -10 29874.3 1658.39   2
   2   6 -10 27517.0 2525.50   1
  -6  -2  -7 68792.3 4435.37   2
  -8   2  -7 70159.7 4566.09   2
  -6  -2  -4 105912. 4990.57   2
   8  -6  -4 107158. 5100.70   1
  -8   2  -4 110268. 4626.57   2
   6  -8  -4 113985. 3910.48   1
   6  -8  -1 120997. 5120.98   1
  -8   2  -1 120483. 3926.33   2
   8  -6  -1 123198. 6102.83   1
  -2   8  -1 108328. 4335.77   1
   6  -8   2 103840. 5728.64   1
  -2   8   2 106282. 4124.15   1
   8  -6   5 170427. 8481.67   1
  -2   8   5 143573. 4652.64   1
  -2   8   8 4824.67 1101.11   2
   8  -6   8 4895.53 1548.95   1
   6  -8   8 3950.86 1155.88   1
  -2   8   8 4451.83 790.222   1
  -2   8  11 57701.6 4068.98   2
   2   6  14 92152.8 4805.20   1
  -2   8  14 87058.1 3823.68   1
   2   6  17 11474.7 1808.87   1
  -2   8  17 11532.1 1557.32   1
   5  -8 -29 4673.22 1885.57   2
   8  -5 -26 8276.84 2135.83   2
  -8   3 -26 5369.72 2674.37   2
   5  -8 -26 9714.31 2516.44   2
  -5  -3 -26 8590.49 3164.49   2
   3   5 -26 6988.74 1937.96   1
  -3   8 -26 11672.4 3233.82   1
   8  -5 -23 22199.9 3175.82   2
   5  -8 -23 23617.7 3554.00   2
  -5  -3 -23 20726.0 4311.93   2
   3   5 -23 19327.2 2996.30   1
  -3   8 -23 26772.5 4547.75   1
   5  -8 -20 7445.70 1814.27   2
   3   5 -20 5003.99 1294.85   1
  -5  -3 -20 8847.66 2728.01   2
   8  -5 -20 6347.83 1474.26   2
  -3   8 -20 7322.21 2298.54   1
   3   5 -17 52293.5 3889.80   1
  -5  -3 -17 55431.3 5817.58   2
   8  -5 -17 50476.0 3632.27   2
  -3   8 -17 48258.2 4961.63   1
   5  -8 -17 51141.6 4238.74   2
   8  -5 -14 28458.8 2290.58   2
   3   5 -14 29356.5 2739.73   1
  -5  -3 -14 29850.5 3785.56   2
   5  -8 -14 28391.0 2788.08   2
  -3   8 -14 28528.1 3283.87   1
   8  -5 -11 25851.1 1353.24   1
   3   5 -11 25009.9 2388.67   1
   5  -8 -11 26022.3 2412.23   2
  -5  -3 -11 27409.3 3358.92   2
  -8   3 -11 20084.4 3095.35   2
  -3   8 -11 24217.8 2672.25   1
   8  -5 -11 25649.4 1648.61   2
   8  -5 -11 26429.9 1222.63   1
   3   5  -8 54603.7 3424.98   1
   5  -8  -8 58211.9 3200.19   2
  -8   3  -8 56574.5 4454.18   2
  -5  -3  -8 62514.4 4448.37   2
   8  -5  -8 51242.1 1438.06   2
  -5  -3  -5 23450.3 2448.50   2
  -8   3  -5 23791.1 2349.14   2
   8  -5  -5 24658.3 1918.58   1
   5  -8  -2 3377.07 778.588   1
  -5  -3  -2 3240.91 811.450   2
   8  -5  -2 2398.65 671.377   1
  -8   3  -2 2946.98 621.297   2
   3   5  -2 2886.07 769.618   2
  -3   8  -2 2751.01 670.952   1
   5  -8   1 70013.8 4202.12   1
   8  -5   1 74985.1 4405.89   1
  -3   8   1 63917.5 3714.95   2
  -3   8   1 63388.7 3091.16   1
  -3   8   4 94965.3 3587.64   1
   5  -8   4 101129. 5764.15   1
   8  -5   4 111270. 5919.17   1
  -3   8   4 104551. 4813.67   2
   5  -8   7 33859.2 3756.34   1
   8  -5   7 40145.5 4093.62   1
  -3   8   7 36697.9 2156.24   1
   8  -5  10 51053.6 4869.40   1
  -3   8  10 52415.8 3647.89   2
  -3   8  10 48198.2 2355.72   1
  -3   8  13 55438.2 2671.16   1
  -3   8  13 57479.9 4237.01   2
   3   5  13 53463.9 3719.65   1
  -3   8  16 54884.8 3110.04   1
   3   5  16 57952.8 4071.28   1
   4  -8 -27 2496.73 1443.24   2
   4   4 -27 3771.58 1362.43   1
  -4  -4 -24 21441.8 4458.45   2
  -8   4 -24 8436.76 1880.93   1
   4  -8 -24 17617.6 3301.38   2
  -4   8 -24 22652.9 4330.81   1
  -8   4 -24 14074.5 4014.94   2
   4   4 -24 16945.9 2927.04   1
   8  -4 -24 15745.1 2811.76   2
   4   4 -21 863.690 373.243   1
  -4   8 -21 3577.24 1719.12   1
   4  -8 -21 972.250 501.931   2
  -4  -4 -21 3308.82 1892.29   2
   8  -4 -21 2155.08 933.393   2
  -8   4 -18 39107.2 5384.43   1
  -4   8 -18 74542.8 6919.58   1
   8  -4 -18 71937.1 4820.11   2
  -4  -4 -18 72259.4 6710.13   2
   4   4 -18 66033.4 4431.86   1
   4  -8 -18 73396.7 5508.18   2
   4   4 -15 13693.3 1856.04   1
  -4   8 -15 10940.4 2439.15   1
  -8   4 -15 5177.31 1440.80   1
   4  -8 -15 13472.7 2071.60   2
  -4  -4 -15 13910.5 2624.24   2
   8  -4 -15 10518.1 1216.92   1
   8  -4 -15 13924.0 1838.01   2
   4  -8 -12 73541.7 4433.59   2
   4   4 -12 71302.8 4010.66   1
  -4  -4 -12 84504.5 5949.65   2
  -4   8 -12 71171.7 5312.47   1
   8  -4 -12 77130.6 3413.17   2
   8  -4 -12 79271.6 2734.44   1
   4  -8  -9 44483.2 3137.59   2
   4   4  -9 44675.6 3092.90   1
   8  -4  -9 42415.6 1736.14   2
  -4  -4  -9 51368.8 4078.20   2
   8  -4  -9 45929.6 2134.47   1
  -4  -4  -6 277556. 8666.38   2
   8  -4  -6 292719. 6200.73   1
  -4  -4  -3 88446.6 4377.83   2
   4  -8  -3 98377.4 3933.03   1
   8  -4  -3 101676. 4056.09   1
  -8   4  -3 96290.4 4119.96   2
  -4   8  -3 97187.7 4405.35   1
  -4   8   0 73777.9 3492.68   1
   4   4   0 73088.1 3877.88   2
  -8   4   0 63334.8 2073.45   2
   8  -4   0 77301.5 3907.39   1
   4  -8   0 76410.0 4090.98   1
   4  -8   3 101281. 5395.21   1
  -4   8   3 96385.8 4380.12   2
  -4   8   3 95159.7 3600.41   1
   4   4   3 90134.0 4345.88   2
   8  -4   3 91913.3 4837.14   1
  -4   8   6 274699. 5401.27   1
   8  -4   6 283379. 9086.11   1
  -4   8   6 282589. 7672.72   2
   4  -8   6 263624. 9874.84   1
  -4   8   9 45096.1 1988.84   1
   8  -4   9 43885.1 3926.84   1
   4   4  12 72203.5 4322.01   1
  -4   8  12 70267.0 2519.03   1
  -4   8  12 76080.0 4597.79   2
  -4   8  12 68527.4 2292.25   1
  -4   8  15 7795.48 1000.57   1
  -4   8  15 11246.4 909.781   1
  -4   8  18 60275.4 2351.95   1
  -4   8  18 64631.8 2187.08   1
  -8   5 -28 3836.76 1412.21   1
   3  -8 -28 9432.26 2664.97   2
  -8   5 -25 22539.1 4592.65   1
   3  -8 -25 23406.3 4008.15   2
  -3  -5 -25 20044.6 4068.99   2
   8  -3 -25 18161.7 3214.00   2
   5   3 -25 22473.8 3559.80   1
   3  -8 -22 18459.8 3174.81   2
   5   3 -22 16772.0 2529.35   1
  -5   8 -22 27636.8 4722.46   1
  -8   5 -22 16495.6 3802.97   1
  -3  -5 -22 19090.3 3664.48   2
  -5   8 -19 59512.0 6695.46   1
   3  -8 -19 45834.3 4655.28   2
  -3  -5 -19 49577.7 5678.19   2
   5   3 -19 44575.4 3659.47   1
  -8   5 -19 40034.7 5837.50   1
   8  -3 -19 38865.5 3466.45   1
  -5   8 -16 69818.4 6926.74   1
   3  -8 -16 61088.1 4831.91   2
   5   3 -16 63682.6 4029.94   1
  -8   5 -16 46641.7 5996.30   1
   8  -3 -16 63304.8 3300.17   1
  -3  -5 -16 66502.7 5933.17   2
  -5   8 -13 51277.1 5422.38   1
   5   3 -13 49157.1 3317.09   1
   8  -3 -13 53026.0 2610.38   1
   3  -8 -13 53221.0 4131.01   2
  -3  -5 -13 56684.7 4968.29   2
  -3  -5 -10 44195.2 3935.49   2
   8  -3 -10 44274.0 2347.91   1
   3  -8 -10 44868.5 3409.09   2
   5   3 -10 43870.9 3088.17   1
  -5   8 -10 45961.5 4605.86   1
  -3  -5  -7 48655.8 3788.73   2
   3  -8  -7 42749.5 2977.69   2
  -3  -5  -4 104134. 4930.46   2
  -5   8  -4 110207. 5372.44   1
  -8   5  -4 97303.5 6086.31   1
   8  -3  -1 73037.9 3619.83   1
  -5   8  -1 68771.3 3778.70   1
   3  -8  -1 73633.7 3855.54   1
   5   3  -1 66049.3 3509.56   2
  -5   8   2 2345.09 538.136   1
   3  -8   2 2443.69 835.574   1
   5   3   2 1921.85 611.470   2
   8  -3   2 1588.53 574.172   1
  -5   8   2 2217.93 611.941   2
   3  -8   5 28095.4 3061.27   1
   8  -3   5 24824.2 2438.46   1
  -5   8   5 24282.1 2077.24   2
   5   3   5 24204.6 2238.10   2
  -5   8   5 28251.6 1837.94   1
   8  -3   8 66242.7 4370.63   1
  -5   8   8 69687.1 3724.23   2
  -5   8   8 70253.4 2401.85   1
   5   3   8 61828.1 3848.57   2
   3  -8   8 68749.9 5332.79   1
   5   3  11 23426.8 2468.07   1
  -3  -5  11 26200.6 2987.58   1
   2  -8 -26 2945.58 1311.94   2
  -2  -6 -26 1304.96 890.720   2
  -8   6 -26 2321.05 1161.59   1
  -6   8 -23 10521.5 3304.66   1
  -2  -6 -23 4209.78 1683.01   2
  -8   6 -23 5550.96 2280.71   1
   2  -8 -23 6037.86 1970.05   2
   6   2 -23 5195.90 1523.91   1
  -8   6 -20 6234.66 2310.13   1
   6   2 -20 4071.31 1140.32   1
   2  -8 -20 4091.53 1457.96   2
  -2  -6 -20 3823.95 1450.14   2
  -6   8 -20 5697.19 2370.41   1
   2  -8 -17 11016.7 2189.98   2
   6   2 -17 10353.9 1692.56   1
  -2  -6 -17 10803.6 2420.22   2
   8  -2 -17 10359.9 1468.47   1
  -6   8 -17 13337.1 3196.67   1
  -8   6 -17 14001.4 3370.98   1
  -8   6 -14 86866.9 7911.81   1
  -2  -6 -14 83199.4 6051.72   2
   6   2 -14 73759.2 4036.48   1
   8  -2 -14 79048.7 3557.47   1
   2  -8 -14 82248.3 5519.38   2
  -6   8 -14 97062.9 7990.79   1
   6   2 -11 46978.5 3175.70   1
  -2  -6 -11 51385.5 4351.96   2
  -6   8 -11 56569.6 5753.53   1
  -8   6 -11 41609.5 5179.65   1
   2  -8 -11 50677.7 3953.32   2
   8  -2 -11 49649.5 2772.19   1
  -8   6  -8 5392.01 1557.83   1
   2  -8  -8 6225.20 1250.16   2
  -2  -6  -8 7111.05 1498.28   2
  -6   8  -8 4400.16 1540.28   1
  -6   8  -5 155979. 8168.66   1
  -2  -6  -5 148213. 6074.84   2
   8  -2  -5 134371. 2958.56   2
  -8   6  -2 96218.5 5553.00   1
   8  -2  -2 99477.6 2704.22   2
  -6   8  -2 109437. 6243.77   1
   6   2  -2 102882. 4174.07   2
  -8   6   1 116715. 5091.85   1
   6   2   1 107262. 4325.93   2
   2  -8   1 120812. 5467.45   1
  -6   8   1 105149. 5357.97   1
   6   2   4 103451. 4436.78   2
  -6   8   4 111544. 4188.59   2
   8  -2   4 115680. 5095.43   1
   2  -8   4 129573. 6218.28   1
  -6   8   4 91656.5 4488.03   1
   8  -2   7 70165.2 4392.46   1
  -6   8   7 71376.8 3457.40   2
   6   2   7 68385.6 3891.80   2
   2  -8   7 81635.1 5527.41   1
   6   2  10 27936.0 2747.27   1
   2  -8  10 30097.4 3673.34   1
  -6   8  10 30513.0 2591.44   2
  -2  -6  10 31106.6 3347.58   1
   8  -2  10 28045.2 2901.63   1
  -8   7 -27 4872.46 2282.84   1
   1  -8 -27 3357.78 1370.52   2
  -7   8 -27 6183.44 2556.37   1
  -7   8 -24 24679.7 4844.99   1
  -8   7 -24 21187.8 4693.02   1
   1  -8 -24 17668.4 3577.09   2
  -1  -7 -24 12327.6 3134.41   2
   7   1 -24 15074.2 2626.98   1
   7   1 -21 7312.22 1499.58   1
  -1  -7 -21 6657.79 2066.80   2
  -8   7 -21 13329.4 3614.39   1
   8  -1 -21 8456.17 1617.59   1
   1  -8 -21 10173.7 2413.20   2
  -8   7 -18 131974. 10451.4   1
   1  -8 -18 93645.6 6889.14   2
  -1  -7 -18 100110. 7522.88   2
  -7   8 -18 143683. 10625.1   1
   7   1 -18 94751.6 4969.81   1
   7   1 -15 16431.4 1913.10   1
  -7   8 -15 24832.0 4348.90   1
  -1  -7 -15 16616.6 2771.06   2
   1  -8 -15 18635.0 2815.26   2
  -8   7 -15 27995.1 4695.34   1
   7   1 -12 93801.8 4479.46   1
  -1  -7 -12 102476. 6327.16   2
  -7   8 -12 137281. 9393.06   1
   1  -8 -12 103409. 6056.15   2
  -8   7 -12 123797. 9345.60   1
  -1  -7  -9 9458.72 1787.06   2
  -7   8  -9 13267.1 2830.38   1
  -8   7  -9 12309.7 2853.11   1
   8  -1  -9 9961.90 1337.88   1
   1  -8  -9 10148.7 1720.94   2
  -1  -7  -6 36536.0 3113.23   2
   1  -8  -6 37073.8 2959.27   2
  -7   8  -6 39747.9 4724.27   1
   8  -1  -6 36671.5 1944.38   2
  -8   7  -6 31500.4 3977.32   1
   7   1  -3 872.630 368.771   2
  -8   7  -3 278.986 275.007   1
  -8   7   0 474814. 11768.5   1
  -7   8   0 454058. 12698.1   1
   7   1   0 482346. 8777.00   2
   8  -1   0 485161. 7477.06   2
  -8   7   3 12910.1 1554.22   1
  -7   8   3 12001.5 1279.42   2
   7   1   3 12565.4 1484.00   2
  -8   7   3 12408.8 952.359   2
  -7   8   3 7695.45 1387.30   1
   8  -1   3 11451.5 1387.31   2
   1  -8   3 13533.3 1959.44   1
  -7   8   6 11715.5 1284.22   2
   7   1   6 11194.1 1529.03   2
  -1  -7   6 12838.8 1978.07   1
   8  -1   6 10819.9 1633.27   1
   1  -8   6 13694.9 2211.32   1
  -7   8   6 11396.6 1129.73   1
   8  -1   9 37763.2 3236.99   1
  -1  -7   9 42263.0 4011.55   1
  -7   8   9 38618.3 2697.38   2
   7   1   9 40080.7 3281.42   1
   1  -8   9 42127.2 4196.11   1
   0  -8 -25-1616.50 1519.70   2
  -8   8 -25 979.539 1390.00   1
   8   0 -22 40421.0 3676.94   1
   0  -8 -22 41948.3 5358.04   2
   0  -8 -19-47.7930 435.037   2
   8   0 -19 232.126 176.601   1
   8   0 -16 56129.8 3534.09   1
   0  -8 -16 61571.0 5496.28   2
   8   0 -13 310.179 259.454   1
   0  -8 -13 363.422 529.761   2
   0  -8 -10 6686.10 1505.23   2
  -8   8 -10 7944.38 2577.11   1
   0  -8  -7 335.487 500.642   2
  -8   8  -7-463.546 996.134   1
   8   0  -4 130904. 4230.08   2
  -8   8  -4 139551. 8131.77   1
  -8   8  -1-237.988 578.648   1
   8   0  -1 108.605 149.608   2
  -8   8   2 11323.0 1151.39   2
   8   0   2 11015.9 1337.34   2
  -8   8   2 8933.53 1470.12   1
   0  -8   5 20.9561 317.275   1
  -8   8   5 699.665 256.573   2
  -8   8   5 396.314 371.055   1
   8   0   5 250.713 321.693   2
   8   0   8 7518.52 1424.05   1
   0  -8   8 9325.72 1953.05   1
   0   9 -24 15428.1 2966.60   1
  -9   0 -24 8407.94 3085.52   2
  -9   0 -21 1355.90 1398.36   2
   9  -9 -21-77.7828 413.592   2
   0   9 -21-179.834 603.120   1
   9  -9 -18 119345. 5731.23   2
  -9   0 -18 103729. 8848.12   2
   0   9 -18 100785. 6010.04   1
  -9   0 -15 958.007 1143.97   2
   9  -9 -15-55.8871 191.389   2
   0   9 -15-35.6810 407.175   1
  -9   0 -12 90220.0 6761.89   2
   0   9 -12 82597.2 4843.84   1
  -9   0  -9-522.266 488.616   2
   0   9  -9-43.2295 167.611   1
   9  -9  -6 291300. 6357.37   1
  -9   0  -6 286886. 9364.58   2
   0   9  -3 40.3453 335.069   1
  -9   0  -3 55.9684 229.694   2
   9  -9  -3 84.1663 231.841   1
   9  -9   0 61575.7 4765.99   1
   0   9   0 78765.7 4255.03   1
   9  -9   3 763.817 676.801   1
   0   9   3 364.262 278.091   1
   0   9   3 36.4454 245.824   2
   9  -9   6 275985. 11596.6   1
   0   9   6 177766. 6406.33   1
   0   9  15 329.015 186.086   1
  -8  -1 -25 1281.84 1184.26   2
   1   8 -25-130.326 856.396   1
  -9   1 -25-736.531 1040.73   2
  -1   9 -25 910.887 549.750   1
   1   8 -22 5074.86 1489.63   1
  -1   9 -22 5705.34 1762.58   1
  -9   1 -22 2182.10 1481.01   2
   9  -8 -22 5454.49 1351.22   2
   8  -9 -22 6483.09 1588.47   2
  -8  -1 -22 5059.85 2161.72   2
   1   8 -19 2039.44 846.967   1
   9  -8 -19 1974.50 726.647   2
  -1   9 -19 1481.17 707.436   1
   8  -9 -19 3016.51 937.249   2
  -8  -1 -19 4312.05 1961.40   2
  -9   1 -19 2900.66 1501.14   2
   8  -9 -16 62914.5 4031.01   2
  -9   1 -16 52716.5 5938.17   2
  -8  -1 -16 58492.2 6155.09   2
  -1   9 -16 52085.4 4171.03   1
   1   8 -16 57223.1 4221.85   1
   9  -8 -16 60346.5 3577.89   2
   9  -8 -13 6827.82 1019.19   2
   8  -9 -13 7527.96 1234.61   2
  -8  -1 -13 4898.15 1467.77   2
  -9   1 -13 7584.73 2049.40   2
   1   8 -13 7384.95 1453.76   1
  -1   9 -13 6771.93 1464.20   1
   1   8 -10 1739.52 609.719   1
  -9   1 -10 2958.59 1215.93   2
  -1   9 -10 2100.81 766.592   1
  -8  -1 -10 1712.99 799.341   2
   9  -8  -7 4648.52 782.872   1
   1   8  -7 4288.21 1084.33   1
  -8  -1  -7 3240.61 1049.29   2
  -9   1  -7 4461.84 1151.72   2
  -1   9  -7 4737.32 1052.41   1
   8  -9  -7 4367.09 607.056   1
  -1   9  -4 137005. 5512.13   1
   8  -9  -4 157261. 5333.88   1
  -9   1  -4 146322. 5901.91   2
  -8  -1  -4 151860. 6277.24   2
  -1   9  -1 15323.5 1803.87   1
  -9   1  -1 14362.6 1576.51   2
   9  -8  -1 15380.9 2348.14   1
   8  -9  -1 12094.2 1886.25   1
   1   8  -1 13641.2 1765.35   1
  -1   9   2 45493.6 3714.37   2
   8  -9   2 27159.8 3303.29   1
   1   8   2 36451.4 2863.62   1
   9  -8   2 55522.0 4781.62   1
  -1   9   2 36596.8 2740.14   1
  -1   9   5 5653.22 1296.41   2
  -1   9   5 3866.12 854.491   1
   1   8   5 5070.96 1234.97   2
   8  -9   5 4240.41 1329.95   1
   9  -8   5 8836.30 2092.01   1
  -1   9   8 55464.5 4144.82   2
  -1   9   8 45787.5 3026.44   1
   1   8  17 753.751 499.103   1
  -1   9  17 842.083 449.032   1
   2   7 -29 702.899 806.155   1
  -2   9 -26 5722.64 2077.83   1
   7  -9 -26 6111.80 1812.66   2
   2   7 -26 4229.74 1400.08   1
  -2   9 -23 7074.34 2105.01   1
   2   7 -23 6841.60 1835.77   1
   7  -9 -23 7425.37 1848.53   2
   9  -7 -23 7498.50 1690.45   2
  -7  -2 -23 10488.9 3262.14   2
  -9   2 -23 1118.94 867.478   2
   7  -9 -20 783.550 288.095   2
  -7  -2 -20 2285.13 1689.75   2
   2   7 -20 126.783 453.306   1
  -9   2 -20-107.200 962.354   2
   9  -7 -20 637.179 466.910   2
  -2   9 -20 808.509 644.611   1
   7  -9 -17 3446.98 946.001   2
  -7  -2 -17 6220.85 2072.27   2
   9  -7 -17 3605.60 923.635   2
  -9   2 -17 1883.60 719.774   2
  -2   9 -17 2369.06 973.997   1
   2   7 -17 3677.50 1058.89   1
   9  -7 -14 12012.8 1360.94   2
   7  -9 -14 13094.6 1800.45   2
   2   7 -14 11460.0 1790.64   1
  -7  -2 -14 11738.3 2478.89   2
  -9   2 -14 10466.0 2492.92   2
  -2   9 -14 9534.43 1734.71   1
   9  -7 -11 524.076 224.581   2
   7  -9 -11 557.372 338.548   2
  -9   2 -11 882.124 782.144   2
   2   7 -11 316.208 430.035   1
  -7  -2 -11 550.616 310.023   2
  -2   9 -11 382.138 357.661   1
   2   7  -8 58510.5 3745.69   1
  -7  -2  -8 69033.8 4835.92   2
  -9   2  -8 68634.1 4796.96   2
  -2   9  -8 63701.3 3950.78   1
  -9   2  -5 15473.4 1979.52   2
  -2   9  -5 16716.2 1894.85   1
  -7  -2  -5 15760.7 2156.77   2
   9  -7  -5 16259.7 2122.19   1
   7  -9  -5 18758.6 1601.42   1
  -9   2  -2 28848.8 2210.03   2
   7  -9  -2 31557.6 2666.15   1
  -2   9  -2 26862.2 2324.99   1
  -7  -2  -2 28695.5 2509.65   2
   9  -7  -2 31119.6 3300.56   1
   9  -7   1 49194.8 4459.50   1
  -2   9   1 44516.4 2884.54   1
   7  -9   1 40223.3 3614.16   1
  -2   9   1 46751.8 3668.93   2
   2   7   1 42254.8 3069.01   1
  -2   9   4 159407. 6737.74   2
   7  -9   4 116561. 6958.14   1
  -2   9   4 133965. 4957.86   1
   9  -7   4 180850. 9153.97   1
   7  -9   7 24122.7 3405.12   1
  -2   9   7 36640.7 3250.81   2
  -2   9   7 31055.4 2312.37   1
   9  -7   7 43179.3 4562.15   1
  -2   9  10 27116.4 2857.11   2
  -2   9  10 24000.4 2024.64   1
   2   7  16 12879.8 1925.89   1
  -2   9  16 13747.0 1669.69   1
  -3   9 -27 3767.67 2156.75   1
   6  -9 -27 2593.65 1220.89   2
   3   6 -27 1154.65 711.264   1
  -3   9 -24 26884.6 4585.52   1
   6  -9 -24 22442.3 3450.97   2
  -6  -3 -24 20055.0 4442.42   2
   3   6 -24 21528.5 3264.10   1
   3   6 -21 3804.83 993.991   1
   6  -9 -21 7276.69 1813.17   2
  -6  -3 -21 8581.14 2520.40   2
   9  -6 -21 6708.28 1503.13   2
  -9   3 -21 1379.11 823.304   2
  -3   9 -21 4692.37 1685.78   1
  -6  -3 -18 70683.6 6955.32   2
   6  -9 -18 70318.2 5051.33   2
   9  -6 -18 73549.8 4311.78   2
   3   6 -18 64546.8 4526.16   1
  -3   9 -18 59998.3 5579.39   1
   9  -6 -15 12874.6 1496.17   2
  -6  -3 -15 14036.8 2776.38   2
   6  -9 -15 12657.2 1933.77   2
   3   6 -15 13457.3 1939.49   1
  -9   3 -15 6255.48 1909.95   2
  -3   9 -15 12514.0 2123.97   1
   3   6 -12 146056. 5960.26   1
   9  -6 -12 156020. 4056.13   2
  -9   3 -12 130828. 8089.23   2
  -3   9 -12 146287. 6787.59   1
  -6  -3 -12 176006. 9011.24   2
   6  -9 -12 158523. 6116.18   2
  -6  -3  -9 65377.7 4850.92   2
   3   6  -9 59156.9 3781.58   1
   9  -6  -9 60646.8 2936.00   1
  -3   9  -9 59177.6 3961.15   1
  -9   3  -9 58944.0 4793.27   2
  -6  -3  -6 122969. 6082.66   2
   9  -6  -6 125640. 4932.30   1
  -3   9  -6 106857. 4950.10   1
  -9   3  -6 120442. 5724.63   2
   9  -6  -3 113626. 5317.51   1
  -3   9  -3 105656. 4619.86   1
  -9   3  -3 107252. 4293.70   2
  -6  -3  -3 103114. 4983.92   2
   6  -9  -3 114822. 4570.05   1
   6  -9   0 107225. 5342.24   1
   9  -6   0 109203. 5654.27   1
  -9   3   0 100818. 3192.36   2
  -3   9   0 93980.5 4070.66   1
  -3   9   3 39885.6 2555.89   1
   9  -6   3 46030.1 4086.83   1
   6  -9   3 36851.2 3592.07   1
  -3   9   6 242124. 6136.21   1
   9  -6   6 273909. 10984.6   1
  -3   9   6 262522. 8312.98   2
  -3   9   9 1271.90 394.242   1
  -3   9   9 1326.99 607.854   2
  -3   9  12 39110.6 3478.90   2
  -3   9  12 33110.3 2158.67   1
  -3   9  15 24419.8 1979.03   1
  -3   9  15 20008.9 1673.86   1
   5  -9 -28 16797.7 3494.04   2
   4   5 -28 13906.7 3023.73   1
  -4   9 -25 17083.3 3867.05   1
   4   5 -25 11216.6 2396.90   1
   5  -9 -25 9538.10 2371.07   2
  -5  -4 -25 7583.00 2414.38   2
  -9   4 -25 10678.4 3603.75   2
  -5  -4 -22-634.794 1706.34   2
  -4   9 -22 1478.55 1138.96   1
   5  -9 -22 1696.47 857.626   2
   9  -5 -22 1349.51 747.577   2
  -9   4 -22 1798.87 1474.82   2
   4   5 -22-218.164 655.481   1
  -4   9 -19 10200.6 2636.79   1
   5  -9 -19 10832.5 2101.45   2
   4   5 -19 9681.38 1780.44   1
   9  -5 -19 10778.2 1782.19   2
  -5  -4 -19 11813.0 2792.36   2
  -9   4 -19 4142.23 1695.04   2
  -9   4 -16 21138.5 3943.18   2
  -4   9 -16 49899.6 5148.88   1
  -5  -4 -16 54401.3 5653.18   2
   4   5 -16 49086.6 3694.20   1
  -9   4 -16 21836.1 3880.78   1
   9  -5 -16 54456.9 3361.88   2
   5  -9 -16 51771.7 4245.29   2
   5  -9 -13 14868.5 2072.38   2
   4   5 -13 13523.0 1832.37   1
  -5  -4 -13 15248.3 2662.49   2
   9  -5 -13 15390.4 1417.07   2
   9  -5 -13 15445.6 1156.03   1
  -4   9 -13 12911.0 2296.73   1
   9  -5 -13 15450.3 1154.29   1
   5  -9 -10 12530.8 1714.99   2
   4   5 -10 12163.4 1697.68   1
   9  -5 -10 14756.5 1302.97   1
  -5  -4 -10 14978.7 2390.44   2
   9  -5 -10 11038.6 804.480   2
  -9   4 -10 9520.38 2027.23   2
  -4   9 -10 10806.0 1788.24   1
   9  -5 -10 12775.3 1092.77   1
  -4   9  -7 5552.11 1180.15   1
   4   5  -7 5812.25 1162.99   1
   9  -5  -7 7927.18 1069.20   1
  -9   4  -7 5008.62 1280.87   2
  -5  -4  -7 5590.36 1370.27   2
   9  -5  -4 85772.6 3936.53   1
  -5  -4  -4 76857.2 4472.74   2
  -4   9  -4 79140.0 4163.42   1
  -9   4  -4 81667.7 4091.18   2
   5  -9  -4 72787.7 3455.06   1
   4   5  -1 5792.16 1193.11   2
  -4   9  -1 6207.52 1090.59   1
  -9   4  -1 6077.50 808.696   2
   9  -5  -1 5906.73 1130.61   1
   5  -9  -1 7014.35 1253.58   1
   5  -9   2 58126.9 4219.90   1
  -4   9   2 55028.0 2957.25   1
   4   5   2 53306.2 3579.96   2
   9  -5   2 59181.7 3973.64   1
   4   5   5 84086.7 4567.30   2
   5  -9   5 77454.4 5521.62   1
   9  -5   5 88369.2 5390.47   1
  -4   9   5 78576.4 3325.74   1
  -4   9   8 111528. 3695.63   1
   9  -5   8 113818. 6763.47   1
   4   5   8 111792. 5585.12   2
  -4   9   8 114401. 5313.34   2
  -4   9  11 89963.0 3094.50   1
  -4   9  11 97537.3 5229.77   2
  -4   9  14 8030.62 952.740   1
  -4   9  14 7414.59 839.221   1
  -4   9  17 25873.8 1541.74   1
  -4   9  17 17430.2 1639.38   1
   4  -9 -26 79.8271 832.285   2
  -5   9 -26 2188.68 1706.79   1
   5   4 -26-432.326 952.582   1
   5   4 -23 2503.14 889.101   1
  -9   5 -23 1210.60 2092.95   1
   4  -9 -23 4817.68 1673.31   2
  -5   9 -23 8233.44 2646.29   1
   9  -4 -23 4602.51 1378.73   2
  -9   5 -23 6800.80 3170.18   2
  -4  -5 -23 1990.97 450.797   2
   4  -9 -20 32774.5 3950.50   2
  -4  -5 -20 34882.6 5036.08   2
  -5   9 -20 40201.4 5458.85   1
  -9   5 -20 20223.2 4171.14   1
   9  -4 -20 31062.2 3318.06   2
   5   4 -20 27723.9 3025.96   1
  -5   9 -17 28161.7 4244.57   1
   4  -9 -17 27525.7 3364.04   2
  -4  -5 -17 29671.4 4260.74   2
   5   4 -17 27629.8 2794.67   1
   9  -4 -17 27841.4 2741.79   2
   9  -4 -17 22550.2 2021.97   1
   9  -4 -14 8036.35 1023.29   1
  -9   5 -14 2201.98 1048.37   1
   5   4 -14 6443.86 1319.75   1
  -5   9 -14 5252.99 1681.90   1
   4  -9 -14 7304.87 1525.88   2
  -4  -5 -14 5903.59 1793.12   2
   9  -4 -14 7184.06 1148.76   2
  -4  -5 -11 99694.8 6329.08   2
   5   4 -11 88536.8 4625.63   1
   9  -4 -11 90189.8 3065.78   2
  -5   9 -11 90028.4 6198.22   1
   9  -4 -11 91564.1 3339.40   1
   4  -9 -11 87885.0 4925.58   2
  -4  -5  -8 119601. 6356.74   2
   4  -9  -8 104392. 4796.91   2
  -5   9  -8 109254. 6008.43   1
   5   4  -8 104816. 4936.91   1
  -4  -5  -5 80977.9 4747.70   2
   9  -4  -5 81400.0 3675.27   1
  -5   9  -5 72271.8 4433.26   1
   5   4  -5 73518.0 4109.18   1
   4  -9  -2 46507.4 3121.19   1
   5   4  -2 44414.0 3216.99   2
  -9   5  -2 44577.4 2576.54   2
  -5   9  -2 46137.0 3136.84   1
   9  -4  -2 49005.8 3070.15   1
   5   4   1 5191.68 1088.89   2
   9  -4   1 5230.41 1083.82   1
  -5   9   1 5642.63 1017.10   1
   4  -9   1 6142.61 1274.05   1
   4  -9   4 93192.2 5667.35   1
   5   4   4 82157.9 4367.82   2
  -5   9   4 86309.4 3533.57   1
  -5   9   4 84968.3 4329.40   2
   9  -4   4 83628.9 4741.82   1
   9  -4   7 6253.24 1436.37   1
   4  -9   7 6889.21 1667.55   1
   5   4   7 6723.77 1285.29   2
  -5   9   7 8528.61 1005.40   1
  -5   9  10 11385.9 988.216   1
  -5   9  13 12641.9 930.206   1
  -5   9  13 19031.4 2495.15   2
   3  -9 -27 2105.59 1267.32   2
   3  -9 -24 32156.2 4541.67   2
  -3  -6 -24 30792.4 5217.46   2
   9  -3 -24 24895.6 3600.42   2
   6   3 -24 28129.2 3462.65   1
  -9   6 -24 32774.8 5818.97   1
   6   3 -21 9406.41 1720.85   1
  -6   9 -21 14259.4 3397.79   1
  -3  -6 -21 9209.28 2548.14   2
  -9   6 -21 8406.78 2644.02   1
   3  -9 -21 10169.2 2315.78   2
  -6   9 -18 139613. 10240.5   1
   6   3 -18 110143. 5630.78   1
   3  -9 -18 112290. 7286.66   2
  -3  -6 -18 113334. 8498.87   2
   9  -3 -18 112485. 4866.70   1
  -9   6 -18 114043. 9885.17   1
   6   3 -15 23063.0 2371.21   1
  -6   9 -15 28285.1 4327.27   1
   9  -3 -15 25822.0 2067.07   1
   3  -9 -15 24608.9 3078.92   2
  -3  -6 -15 23089.9 3418.61   2
  -9   6 -15 23225.8 4163.02   1
  -6   9 -12 26165.1 3929.77   1
   6   3 -12 25748.6 2472.24   1
  -3  -6 -12 33485.2 3823.49   2
   3  -9 -12 29853.9 3085.49   2
   9  -3 -12 29139.2 2092.34   1
   6   3  -9 701.229 275.314   1
  -3  -6  -9 1255.22 746.370   2
  -9   6  -9-106.832 856.989   1
  -6   9  -9 552.479 261.008   1
   3  -9  -9 1326.53 578.934   2
  -3  -6  -6 278253. 9040.34   2
   9  -3  -6 221199. 2845.37   2
  -9   6  -6 224457. 10234.7   1
   6   3  -6 250917. 7610.07   1
  -6   9  -6 285140. 10467.5   1
  -9   6  -3 36746.8 3674.09   1
   6   3  -3 38372.3 2844.56   2
  -6   9  -3 40841.3 3523.93   1
   9  -3   0 94034.4 4500.44   1
   6   3   0 90933.8 4284.36   2
  -6   9   0 90882.8 4713.56   1
   3  -9   0 96978.7 4974.61   1
   9  -3   3 104949. 4989.94   1
   6   3   3 95962.1 4582.95   2
  -6   9   3 99738.1 4459.95   2
  -6   9   3 101916. 4460.96   1
   9  -3   6 122981. 5716.33   1
   6   3   6 118829. 5329.22   2
  -6   9   6 127023. 5115.91   2
  -6   9   6 116713. 4186.67   1
   3  -9   6 135987. 7245.15   1
   6   3   9 59296.9 4024.98   2
  -6   9   9 41978.8 2182.54   1
  -2  -7 -25 5766.48 2148.04   2
   2  -9 -25 2010.30 1108.94   2
  -9   7 -25 5537.15 2465.99   1
   2  -9 -22 22680.8 3761.85   2
  -2  -7 -22 20883.4 3961.43   2
  -9   7 -22 28432.5 5374.49   1
   7   2 -22 19330.3 2559.50   1
  -9   7 -19 16367.2 3941.34   1
  -2  -7 -19 12857.4 2783.21   2
   2  -9 -19 14776.3 2767.08   2
  -7   9 -19 20633.3 4162.18   1
   7   2 -19 12724.4 1961.83   1
   2  -9 -16 17072.9 2732.73   2
  -9   7 -16 20320.9 4240.12   1
  -2  -7 -16 15505.5 2849.04   2
  -7   9 -16 18867.5 3768.42   1
   7   2 -16 14816.5 1937.47   1
   7   2 -13 15132.7 1922.58   1
  -7   9 -13 18865.0 3528.69   1
  -2  -7 -13 15733.7 2680.95   2
  -9   7 -13 15915.8 3545.28   1
   2  -9 -13 14805.0 2355.51   2
  -7   9 -10 24545.5 3996.97   1
   2  -9 -10 22018.6 2626.73   2
  -2  -7 -10 22959.1 2912.97   2
  -9   7 -10 18796.1 3465.79   1
   9  -2 -10 19982.0 1929.43   1
   7   2 -10 18533.4 2087.46   1
  -7   9  -7 33239.1 4340.15   1
   9  -2  -7 30161.5 1622.07   2
  -2  -7  -7 34317.3 3269.61   2
  -9   7  -7 24194.7 3592.04   1
   7   2  -7 30199.6 2648.10   1
  -7   9  -4 159460. 8541.04   1
   7   2  -4 154435. 5478.87   2
  -9   7  -4 125563. 7338.33   1
   9  -2  -4 133217. 3182.27   2
  -7   9  -1 44118.9 4223.70   1
   7   2  -1 43014.0 2828.67   2
   9  -2  -1 40802.7 2006.79   2
  -9   7  -1 41439.0 3740.33   1
  -7   9   2 20250.1 2544.69   1
  -7   9   2 26009.6 2145.72   2
   9  -2   2 25149.1 2482.63   1
   7   2   2 23448.7 2126.86   2
  -9   7   2 22944.8 1136.68   2
   2  -9   2 28114.0 2914.00   1
  -7   9   5 10648.6 1566.83   1
  -7   9   5 15992.7 1661.33   2
   7   2   5 13147.1 1697.34   2
   9  -2   5 18223.0 2171.98   1
   2  -9   5 18088.5 2509.63   1
   7   2   8 70487.9 4223.54   2
  -7   9   8 60678.0 2321.84   1
  -7   9   8 72763.6 3773.06   2
   1  -9 -26 1072.28 443.061   2
  -1  -8 -23 1449.38 920.038   2
  -8   9 -23 4853.32 2516.63   1
   8   1 -23-741.869 885.729   1
   1  -9 -23 2056.84 1268.33   2
  -9   8 -23 2894.24 1955.94   1
   8   1 -20 9868.21 1739.94   1
   9  -1 -20 11088.6 1714.43   1
   1  -9 -20 11386.1 2709.15   2
  -1  -8 -20 8812.93 2345.98   2
  -9   8 -20 17286.3 4127.23   1
  -8   9 -20 20788.7 4332.49   1
   1  -9 -17 389.796 530.971   2
  -9   8 -17 3741.04 2128.42   1
   8   1 -17 558.308 490.938   1
   9  -1 -17 851.185 513.262   1
  -1  -8 -17 100.849 272.096   2
  -8   9 -17 3748.80 2032.23   1
  -9   8 -14 39728.1 5827.33   1
   8   1 -14 30518.2 2716.90   1
   1  -9 -14 32813.2 3728.58   2
  -1  -8 -14 37891.2 4234.92   2
   8   1 -11 2874.33 809.212   1
   1  -9 -11 3131.76 1058.41   2
  -1  -8 -11 3614.09 1213.98   2
  -8   9 -11 3181.30 1469.46   1
  -9   8 -11 5338.29 2363.35   1
  -8   9  -8 53832.2 5830.09   1
  -1  -8  -8 48215.8 4013.71   2
   1  -9  -8 46424.9 3702.00   2
   8   1  -8 45645.9 3257.78   1
  -9   8  -8 47684.5 5372.92   1
  -9   8  -5 4057.68 1422.65   1
   8   1  -5 4198.32 852.577   2
   9  -1  -5 3410.63 619.241   2
  -8   9  -5 4393.62 1577.83   1
  -8   9  -2 47827.1 4629.73   1
   9  -1  -2 41567.5 2211.23   2
   8   1  -2 43929.5 2695.80   2
   8   1   1 12411.8 1480.18   2
  -8   9   1 11273.5 2020.13   1
  -9   8   1 11368.3 1842.02   1
   9  -1   1 12563.2 1329.79   2
   9  -1   4 130536. 5762.89   1
   8   1   4 132766. 5138.96   2
  -9   8   4 127481. 3178.49   2
  -8   9   4 138064. 4569.88   2
  -8   9   4 111972. 5077.60   1
   1  -9   4 150726. 7182.08   1
  -8   9   7 4800.14 888.286   2
  -8   9   7 4352.01 693.668   1
   8   1   7 5222.11 1174.57   2
  -9   9 -24 27041.0 5424.88   1
   0  -9 -24 14549.6 3469.55   2
   0  -9 -21 981.534 1063.31   2
  -9   9 -21 2071.57 1707.84   1
   9   0 -21-195.869 542.806   1
   9   0 -18 86905.6 4804.66   1
   0  -9 -18 91201.9 7287.75   2
   0  -9 -15-345.729 379.424   2
   9   0 -15 43.4632 204.273   1
   0  -9 -12 65657.3 5172.21   2
   9   0 -12 63710.4 3897.06   1
   9   0  -9-82.3281 368.236   1
   0  -9  -9 446.150 660.166   2
  -9   9  -6 210531. 10860.6   1
   9   0  -6 167634. 5102.97   2
  -9   9  -3 410.241 548.325   1
   9   0  -3 140.270 121.783   2
   9   0   0 100143. 3974.57   2
  -9   9   0 80167.8 5373.27   1
  -9   9   3 213.459 90.2439   2
   9   0   3-13.4618 111.398   2
  -9   9   3 209.579 146.417   1
  -9   9   6 283776. 5991.77   2
   0  10 -25-831.764 1006.92   1
   0  10 -22 4705.61 1419.40   1
 -10   0 -22 6449.18 2550.11   2
   0  10 -19-806.902 616.084   1
 -10   0 -19 839.360 1096.27   2
  10 -10 -19 329.878 208.556   2
  10 -10 -16 27504.4 2360.54   2
 -10   0 -16 23306.0 4115.56   2
   0  10 -16 24047.7 2861.75   1
 -10   0 -13-771.986 933.275   2
   0  10 -13 274.361 358.070   1
   0  10 -10 79768.1 4759.19   1
 -10   0 -10 88259.7 6353.48   2
 -10   0  -7-188.420 336.508   2
   0  10  -7 923.004 528.465   1
  10 -10  -7 487.705 275.789   1
   0  10  -4 100925. 5132.97   1
  10 -10  -4 90047.8 4847.83   1
   0  10  -1-174.898 361.811   1
  10 -10  -1-163.036 479.077   1
  10 -10   2 78694.5 6038.96   1
   0  10   2 74385.7 4349.36   1
  10 -10   5 746.473 949.011   1
   0  10   5 150.136 154.669   1
   0  10   8 219445. 7615.45   1
   1   9 -26 5227.40 1811.89   1
   1   9 -23 2118.58 1052.97   1
  -1  10 -23 638.532 700.635   1
  -9  -1 -23 2036.26 1435.81   2
 -10   1 -23 90.6369 711.054   2
   9 -10 -20 47217.4 3981.70   2
  -9  -1 -20 37205.4 5597.45   2
 -10   1 -20 28431.6 5095.38   2
   1   9 -20 37037.5 3826.17   1
  -1  10 -20 33808.8 3807.63   1
   1   9 -17 1151.62 662.898   1
  -1  10 -17 1238.68 367.684   1
   9 -10 -17 2281.36 794.631   2
  10  -9 -17 2266.40 652.428   2
  -9  -1 -17 239.580 817.730   2
 -10   1 -17 3448.34 1759.44   2
   9 -10 -14 14455.4 1704.71   2
  -9  -1 -14 14438.7 2897.50   2
   1   9 -14 15408.6 2189.72   1
 -10   1 -14 14811.2 2995.26   2
  -1  10 -14 13764.2 2089.05   1
  10  -9 -14 14565.1 1447.21   2
  -9  -1 -11 4293.42 1360.99   2
 -10   1 -11 4764.00 1531.13   2
   1   9 -11 4602.04 1168.55   1
  -1  10 -11 4221.18 1123.67   1
  10  -9  -8 67241.0 2447.96   1
   1   9  -8 58615.4 3929.78   1
 -10   1  -8 68047.1 5050.39   2
  -9  -1  -8 66478.4 5005.60   2
  -1  10  -8 61954.8 4062.31   1
   1   9  -5 16984.2 2135.89   1
   9 -10  -5 20644.0 1916.89   1
  -1  10  -5 18334.4 2149.02   1
  -9  -1  -5 18733.5 2429.51   2
  10  -9  -5 14723.4 1871.59   1
 -10   1  -5 20766.8 2469.30   2
  -1  10  -2 27762.6 2579.86   1
  -9  -1  -2 30257.5 2670.60   2
 -10   1  -2 32619.1 2632.11   2
   9 -10  -2 29030.5 2917.16   1
  10  -9  -2 28347.2 3103.81   1
   1   9  -2 28720.9 2687.34   1
  -1  10   1 10750.6 1591.31   1
   9 -10   1 7709.07 1672.75   1
   1   9   1 10111.1 1580.16   1
   9 -10   4 63286.2 5539.08   1
   1   9   4 69481.2 4229.50   1
  -1  10   4 70733.5 4036.43   1
  -1  10   7 2277.41 720.493   1
  -1  10  10 25158.7 2446.59   1
  -1  10  16 91091.8 4822.05   1
   2   8 -27-144.221 501.744   1
   8 -10 -24 16900.7 2797.63   2
  -8  -2 -24 8762.44 2944.49   2
 -10   2 -24 6563.41 2436.37   2
  -2  10 -24 13485.4 3044.06   1
   2   8 -24 11537.3 2362.61   1
   2   8 -21 1931.30 619.370   1
   8 -10 -21 2440.41 1054.71   2
  -2  10 -21 304.987 482.579   1
  -8  -2 -21-26.7541 1627.61   2
 -10   2 -21 1215.57 766.203   2
   8 -10 -18 47734.5 3928.79   2
  10  -8 -18 49174.2 3310.02   2
  -8  -2 -18 45432.5 5788.39   2
 -10   2 -18 30873.6 5045.00   2
   2   8 -18 38201.6 3601.36   1
  -2  10 -18 38354.4 3991.11   1
   8 -10 -15 2797.56 841.545   2
  -2  10 -15 1884.45 731.082   1
  10  -8 -15 2724.72 605.822   2
  -8  -2 -15 2762.72 1285.16   2
 -10   2 -15 2671.37 1618.29   2
   2   8 -15 2280.30 833.521   1
  -8  -2 -12 55955.6 5280.54   2
   2   8 -12 44860.6 3478.69   1
  -2  10 -12 48187.8 3818.54   1
 -10   2 -12 49132.6 5048.45   2
  -8  -2  -9 8338.87 1841.41   2
  10  -8  -9 8829.70 827.653   1
  -2  10  -9 8866.90 1592.20   1
 -10   2  -9 8642.39 1892.46   2
   2   8  -9 6909.24 1363.23   1
   2   8  -6 132270. 5891.97   1
  -8  -2  -6 157423. 7238.23   2
  -2  10  -6 136149. 5725.35   1
 -10   2  -6 161146. 6886.45   2
   8 -10  -6 160933. 4664.42   1
   8 -10  -3 1873.15 605.324   1
  -2  10  -3 1910.75 725.471   1
  10  -8  -3 1796.71 700.232   1
 -10   2  -3 1641.97 558.005   2
   2   8  -3 1202.58 594.184   1
  -8  -2  -3 1433.04 603.112   2
  -2  10   0 59276.3 3591.75   1
   8 -10   0 48537.4 3978.46   1
  -2  10   0 62922.4 4574.54   2
  10  -8   0 74683.1 5536.91   1
   2   8   0 56203.7 3758.83   1
   2   8   0 62699.2 4581.81   2
  -2  10   3 15782.1 1810.91   1
  -2  10   3 17400.3 2399.26   2
   2   8   3 16715.7 2333.35   2
   8 -10   3 11252.6 2171.73   1
   2   8   3 14211.9 1884.27   1
  10  -8   3 19315.9 2934.81   1
  -2  10   6 173664. 7486.24   2
  -2  10   6 153197. 5606.99   1
  -2  10   9 22810.0 2137.27   1
  -2  10  12 32703.9 2580.24   1
  -2  10  15 12370.6 1606.19   1
  -2  10  15 12459.6 1623.50   1
   3   7 -28 14051.4 3063.07   1
  -3  10 -25 3563.49 1699.94   1
   3   7 -25 4007.95 1497.25   1
   7 -10 -25 3603.15 1250.84   2
 -10   3 -25 186.779 1159.63   2
   3   7 -22 2531.10 1029.68   1
   7 -10 -22 2208.09 1049.45   2
  -7  -3 -22-360.160 1338.10   2
 -10   3 -22-675.796 1560.15   2
  -3  10 -22 1253.26 856.136   1
  -3  10 -19 16786.2 2930.34   1
   7 -10 -19 17751.9 2636.57   2
  10  -7 -19 19275.0 2174.64   2
   3   7 -19 15230.7 2272.66   1
  -7  -3 -19 14755.9 3311.34   2
 -10   3 -19 7545.79 2389.09   2
   7 -10 -16 77498.7 4871.17   2
   3   7 -16 70989.2 4681.92   1
  -7  -3 -16 80056.9 7166.41   2
  10  -7 -16 76168.2 3552.34   2
  -3  10 -16 68748.6 5267.41   1
   7 -10 -13 30096.3 2739.85   2
  -7  -3 -13 33004.8 4148.81   2
   3   7 -13 27851.1 2735.18   1
 -10   3 -13 24956.3 3752.36   2
  10  -7 -13 27337.8 1670.71   2
  -3  10 -13 25692.9 2969.96   1
   3   7 -10 26843.9 2686.91   1
  -7  -3 -10 30659.6 3627.24   2
 -10   3 -10 27054.9 3445.83   2
  -3  10 -10 26998.2 2773.18   1
  10  -7 -10 26822.1 1283.83   1
   3   7  -7 18303.0 2172.11   1
  10  -7  -7 16574.5 2025.50   1
  -7  -3  -7 20869.1 2727.25   2
  -3  10  -7 18442.1 2147.27   1
 -10   3  -7 20797.2 2570.21   2
  -7  -3  -4 48676.4 3731.14   2
  10  -7  -4 51718.8 3993.93   1
  -3  10  -4 46615.3 3241.67   1
 -10   3  -4 50422.0 3375.20   2
   7 -10  -4 50821.0 3077.65   1
  -3  10  -1 5517.67 1060.11   1
  10  -7  -1 6308.08 1525.50   1
   3   7  -1 5746.95 1255.80   1
   7 -10  -1 6518.86 1326.02   1
   3   7  -1 5340.53 1302.35   2
 -10   3  -1 5411.04 872.254   2
  10  -7   2 97661.7 6266.61   1
   7 -10   2 81314.0 5441.62   1
  -3  10   2 83476.4 3991.93   1
   3   7   2 89792.1 5223.70   2
  -3  10   2 97721.0 5504.20   2
  -3  10   5 709.778 283.329   1
  -3  10   5 1463.49 716.351   2
   7 -10   5 480.534 338.130   1
  10  -7   5 106.429 534.014   1
  -3  10   8 24255.9 2719.11   2
  -3  10   8 22013.4 1917.68   1
  -3  10  11 10929.8 1343.80   1
  -3  10  14 10778.5 1342.21   1
  -3  10  17 6273.51 1009.17   1
  -4  10 -26 16470.2 3591.31   1
   6 -10 -26 9542.74 2427.94   2
   4   6 -26 9029.46 2237.07   1
  -4  10 -23 4134.06 1678.97   1
   4   6 -23 2107.56 816.531   1
   6 -10 -23 3710.24 1463.32   2
  -6  -4 -23 1154.96 929.636   2
 -10   4 -23 1840.55 1480.04   2
  10  -6 -20 20188.1 2315.13   2
  -4  10 -20 18528.2 3435.17   1
   6 -10 -20 20723.5 3040.89   2
  -6  -4 -20 20487.4 3945.96   2
   4   6 -20 18028.1 2560.51   1
  10  -6 -17 14035.6 1624.12   2
   4   6 -17 13785.9 2063.78   1
   6 -10 -17 13575.8 2234.29   2
  -6  -4 -17 14303.4 3010.96   2
  -4  10 -17 12075.5 2550.03   1
 -10   4 -17 6238.86 2029.35   2
   6 -10 -14 5662.28 1321.38   2
  10  -6 -14 5006.06 763.608   2
  -4  10 -14 5394.03 1524.69   1
  -6  -4 -14 6239.93 1793.02   2
   4   6 -14 5063.94 1204.36   1
 -10   4 -14 2427.34 1166.00   2
  10  -6 -11 5679.21 477.709   2
   4   6 -11 8053.19 1486.63   1
  -4  10 -11 4581.61 1177.02   1
  -6  -4 -11 8306.14 1906.30   2
  10  -6 -11 6872.72 951.604   1
   6 -10 -11 7126.03 1308.61   2
 -10   4 -11 4583.33 1396.56   2
  10  -6 -11 8406.71 812.191   1
   4   6  -8 92046.9 4882.06   1
  -6  -4  -8 99488.7 6124.60   2
 -10   4  -8 93841.1 5822.53   2
  -4  10  -8 89250.6 4898.40   1
  10  -6  -8 106295. 4306.30   1
  -6  -4  -5 4464.61 1210.35   2
  10  -6  -5 3583.45 853.945   1
   4   6  -5 2526.97 764.597   1
 -10   4  -5 3584.91 931.614   2
  -4  10  -5 3358.57 881.985   1
 -10   4  -2 6822.75 987.606   2
  -4  10  -2 6650.09 1209.14   1
  10  -6  -2 8619.48 1532.67   1
   4   6  -2 6521.25 1391.70   2
   6 -10  -2 7775.32 1384.89   1
  -4  10   1 32658.9 3044.93   2
   6 -10   1 35251.2 3330.39   1
   4   6   1 36210.3 3217.81   2
  -4  10   1 33424.2 2504.98   1
  10  -6   1 37053.5 3405.41   1
   6 -10   4 58501.7 4876.20   1
  10  -6   4 67347.3 4885.21   1
  -4  10   4 56526.4 3054.59   1
  -4  10   4 62665.9 4223.15   2
   4   6   4 64377.7 4291.67   2
  -4  10   7 29670.4 2142.70   1
  -4  10   7 32659.4 3073.07   2
  10  -6   7 31055.9 3694.12   1
   6 -10   7 21497.2 3216.20   1
  -4  10  10 69225.7 3138.86   1
  -4  10  10 74180.9 4726.88   2
  -4  10  13 11992.8 1227.57   1
  -4  10  16 23327.5 1832.45   1
  -4  10  16 24990.3 1703.19   1
   5 -10 -27 2162.46 1176.12   2
   5   5 -27 1630.65 934.682   1
  -5  10 -24 34504.6 5249.99   1
   5 -10 -24 25947.4 3965.41   2
  -5  -5 -24 20620.8 4334.42   2
 -10   5 -24 24273.7 5451.51   2
   5   5 -24 19912.3 2883.55   1
   5   5 -21 5485.25 1361.23   1
  -5  10 -21 8727.30 2579.23   1
   5 -10 -21 5911.75 1680.36   2
  -5  -5 -21 4144.32 1610.46   2
  10  -5 -21 6005.40 1372.25   2
 -10   5 -21 6660.65 2797.32   2
  -5  10 -18 55483.2 5976.80   1
 -10   5 -18 21382.6 4127.61   1
  -5  -5 -18 55818.2 6226.00   2
  10  -5 -18 48567.0 3384.34   2
 -10   5 -18 25793.3 4805.85   2
   5 -10 -18 54374.9 4805.01   2
   5   5 -18 52797.1 4080.36   1
   5 -10 -15 5661.50 1399.07   2
  10  -5 -15 4858.28 751.264   1
  10  -5 -15 5363.98 914.627   2
  -5  -5 -15 4618.41 1509.53   2
   5   5 -15 4700.89 1087.86   1
 -10   5 -15 567.301 1547.14   1
  -5  10 -15 5716.17 1776.69   1
  10  -5 -12 60803.3 2595.19   1
   5   5 -12 51014.2 3704.96   1
  -5  -5 -12 57466.6 5279.51   2
   5 -10 -12 53834.3 3935.70   2
  10  -5 -12 48570.3 1916.22   2
  -5  10 -12 49205.7 4455.15   1
  10  -5 -12 62402.6 2842.09   1
   5   5  -9 10526.5 1636.35   1
  -5  10  -9 6809.24 1443.81   1
  -5  -5  -9 13460.9 2304.13   2
  10  -5  -9 12377.1 1389.98   1
 -10   5  -9 7889.18 1840.81   2
  10  -5  -6 214781. 6306.40   1
 -10   5  -6 193781. 7714.77   2
  -5  10  -6 196432. 7389.31   1
  -5  -5  -6 208525. 8215.36   2
   5   5  -6 189275. 6945.23   1
   5   5  -3 36709.5 3167.33   2
  10  -5  -3 36857.2 2811.81   1
 -10   5  -3 33540.1 2450.06   2
  -5  10  -3 32190.7 2736.06   1
   5 -10  -3 36462.5 2780.60   1
  10  -5   0 30351.2 2735.62   1
 -10   5   0 28496.4 1456.03   2
  -5  10   0 31651.6 2502.96   1
   5   5   0 31864.1 2915.92   2
   5 -10   0 36229.7 3189.18   1
   5 -10   3 35464.5 3581.98   1
   5   5   3 37214.7 3143.05   2
  -5  10   3 36230.9 2503.38   1
  10  -5   3 35732.6 3191.94   1
  -5  10   6 202710. 5556.35   1
   5 -10   6 199351. 9452.12   1
  -5  10   6 209022. 7355.44   2
   5   5   6 197733. 7299.69   2
  10  -5   6 208597. 8424.05   1
  -5  10   9 9492.97 1075.53   1
  -5  10   9 11164.7 1741.04   2
  -5  10  12 55001.0 2256.60   1
  -5  10  12 59711.3 4269.16   2
  -5  10  15 5023.54 571.554   1
  -5  10  15 3942.10 610.719   1
   6   4 -25 3882.32 1366.87   1
   4 -10 -25 3655.60 1514.80   2
 -10   6 -25-463.416 2367.27   1
  -6  10 -25 6640.21 2783.25   1
 -10   6 -25 8949.56 3748.05   2
   4 -10 -22 18033.7 3256.22   2
  -6  10 -22 23690.8 4316.73   1
  -4  -6 -22 15644.9 3578.26   2
   6   4 -22 13645.3 2180.79   1
 -10   6 -22 12161.5 3193.57   1
   4 -10 -19 2708.42 1139.73   2
  -6  10 -19 3472.82 1570.21   1
 -10   6 -19 90.2365 2491.00   1
  -4  -6 -19 2025.76 1132.20   2
  10  -4 -19 2877.44 883.193   2
   6   4 -19 2353.95 920.856   1
  -6  10 -16 32281.7 4735.47   1
  10  -4 -16 33246.1 2278.63   1
   4 -10 -16 31412.8 3539.85   2
  -4  -6 -16 32621.5 4323.24   2
   6   4 -16 28092.9 2785.40   1
  10  -4 -16 28863.9 2513.18   2
  10  -4 -13 11914.2 1302.27   1
   4 -10 -13 10593.0 1901.49   2
   6   4 -13 10299.3 1670.21   1
 -10   6 -13 4934.94 1116.43   1
  -4  -6 -13 12547.2 2505.94   2
  10  -4 -13 11680.3 1263.40   2
  -6  10 -13 11020.8 2526.84   1
  -4  -6 -10 64645.0 5219.18   2
   4 -10 -10 61146.0 4077.41   2
  10  -4 -10 53831.8 1718.32   2
  10  -4 -10 63034.7 3160.03   1
  -6  10 -10 60752.3 5368.41   1
   6   4 -10 59755.2 3942.49   1
 -10   6  -7 21501.8 3351.60   1
  -4  -6  -7 27975.8 3119.98   2
  -6  10  -7 26670.3 3190.35   1
   6   4  -7 26144.9 2601.89   1
  10  -4  -4 68211.6 3759.84   1
   6   4  -4 59086.3 3870.19   1
   6   4  -4 66316.6 4080.46   2
  -6  10  -4 62766.7 4365.85   1
 -10   6  -1 35331.4 2041.46   2
   6   4  -1 36078.4 2981.68   2
  10  -4  -1 37693.6 2922.96   1
  -6  10  -1 33421.6 2841.78   1
   4 -10  -1 37366.8 3130.50   1
  -6  10   2 4423.40 814.394   1
   4 -10   2 4363.01 1229.91   1
   6   4   2 3725.82 957.344   2
  10  -4   2 4599.92 1098.28   1
  -6  10   5 3196.11 695.636   1
   4 -10   5 3189.53 1138.19   1
  10  -4   5 3721.74 1086.77   1
   6   4   5 2719.76 792.191   2
  -6  10   8 101466. 3590.09   1
  -6  10  11 8652.68 1553.39   2
  -6  10  11 6442.45 736.736   1
   3 -10 -26 3344.46 1567.67   2
 -10   7 -23 3582.43 1567.01   1
   7   3 -23 4829.10 1305.76   1
   3 -10 -23 5765.56 1927.29   2
  -3  -7 -23 6454.63 2387.45   2
  -7  10 -23 9561.02 3063.16   1
   3 -10 -20 31789.0 4241.78   2
  -3  -7 -20 32992.0 4850.01   2
   7   3 -20 32714.6 3237.64   1
 -10   7 -20 34487.9 5778.98   1
  -7  10 -17 9185.77 2542.45   1
  10  -3 -17 7591.87 1235.27   1
   3 -10 -17 7289.36 1851.19   2
 -10   7 -17 4624.88 1685.40   1
  -3  -7 -17 6465.07 1915.27   2
   7   3 -17 6005.94 1340.94   1
  -7  10 -14 10629.3 2627.30   1
  10  -3 -14 9287.79 1303.22   1
   7   3 -14 8811.94 1559.99   1
   3 -10 -14 9023.22 1843.57   2
 -10   7 -14 8618.01 2445.68   1
  -3  -7 -14 8916.71 2091.02   2
  -3  -7 -11 15410.4 2684.31   2
  -7  10 -11 14879.0 2971.06   1
 -10   7 -11 8095.78 2361.12   1
   3 -10 -11 14617.8 2174.07   2
  10  -3 -11 13822.0 1575.93   1
   7   3 -11 14352.3 1941.39   1
  -7  10  -8 23615.6 3610.61   1
  10  -3  -8 23018.1 1152.62   2
 -10   7  -8 17469.8 3168.92   1
   7   3  -8 24383.0 2507.48   1
  -3  -7  -8 28781.2 3236.50   2
  -7  10  -5 1663.14 812.673   1
  10  -3  -5 1174.44 231.384   2
 -10   7  -5 496.869 564.861   1
   7   3  -2 78822.2 4274.95   2
 -10   7  -2 77590.4 5454.88   1
  -7  10  -2 81149.6 5484.87   1
   3 -10   1 5072.43 1263.29   1
  10  -3   1 4553.94 1096.10   1
  -7  10   1 5021.43 1268.68   1
   7   3   1 4188.07 977.949   2
  -7  10   4 50713.6 3350.66   2
   7   3   4 47899.2 3372.45   2
  10  -3   4 49298.3 3709.19   1
  -7  10   4 45713.0 3461.20   1
   3 -10   4 56721.4 4629.63   1
  -7  10   7 10721.6 1459.03   1
  -7  10   7 17637.2 1970.06   2
   7   3   7 14645.4 2002.22   2
  -2  -8 -24 17809.3 3899.48   2
 -10   8 -24 22302.6 4976.37   1
   2 -10 -24 17333.1 3583.51   2
  -8  10 -24 23945.6 4844.74   1
   2 -10 -21 4936.52 1751.39   2
  -8  10 -21 9596.57 3017.75   1
  -2  -8 -21 5082.59 1985.90   2
 -10   8 -21 5085.33 2135.12   1
   8   2 -21 4126.45 1124.16   1
  -2  -8 -18 75881.0 7011.86   2
   8   2 -18 69674.4 4487.95   1
 -10   8 -18 95835.1 9495.28   1
   2 -10 -18 80325.6 6537.11   2
  -8  10 -18 108851. 9439.24   1
   8   2 -15 13318.5 1870.35   1
   2 -10 -15 13767.0 2451.22   2
  -8  10 -15 18963.8 3916.96   1
  -2  -8 -15 15350.6 2887.19   2
 -10   8 -15 15882.6 3722.10   1
   8   2 -12 33580.0 2988.87   1
   2 -10 -12 37482.9 3740.06   2
 -10   8 -12 37907.8 5328.28   1
  -8  10 -12 42820.3 5311.79   1
  -2  -8 -12 39523.9 4230.88   2
   2 -10  -9 23006.7 2670.72   2
  10  -2  -9 23196.4 1576.29   2
  -8  10  -9 30037.0 4311.85   1
   8   2  -9 22704.3 2433.28   1
  -2  -8  -9 22459.1 2937.94   2
 -10   8  -9 19317.0 3521.69   1
  -8  10  -6 192997. 10344.6   1
 -10   8  -6 109526. 7776.83   1
  10  -2  -6 142797. 3560.59   2
   8   2  -6 166238. 6038.89   2
  -8  10  -3 20299.3 3140.60   1
   8   2  -3 16864.6 1893.75   2
 -10   8  -3 14165.5 2435.13   1
  10  -2  -3 15365.0 1211.96   2
  -8  10   0 56103.3 4948.05   1
   8   2   0 60923.3 3599.59   2
 -10   8   0 60857.1 4490.98   1
   2 -10   3 2834.35 1035.09   1
  -8  10   3 1086.98 528.208   1
  -8  10   3 851.451 455.445   2
  10  -2   3 1769.92 723.136   1
   8   2   3 1278.20 522.298   2
  -8  10   6 152671. 5444.48   2
   8   2   6 145116. 5939.91   2
  -8  10   9 7946.00 1316.57   2
   1 -10 -25 761.486 941.537   2
   9   1 -22 8373.41 1634.55   1
  -9  10 -22 14694.1 3828.84   1
  -1  -9 -22 9832.96 2767.24   2
   1 -10 -22 9130.19 2525.90   2
 -10   9 -22 13472.0 3903.67   1
   1 -10 -19 6940.36 2054.81   2
  10  -1 -19 7580.82 1425.11   1
  -1  -9 -19 6708.99 2088.17   2
 -10   9 -19 7362.86 2703.52   1
   9   1 -19 6445.87 1422.72   1
 -10   9 -16 113334. 9906.59   1
  10  -1 -16 84329.7 4476.56   1
   9   1 -16 82813.4 4703.61   1
   1 -10 -16 83307.2 6592.32   2
  -1  -9 -16 89212.3 7125.92   2
  -9  10 -16 126791. 9997.43   1
   9   1 -13 9983.68 1651.52   1
  -1  -9 -13 10228.9 2194.90   2
 -10   9 -13 16285.1 3842.04   1
   1 -10 -13 10529.5 2143.60   2
  -9  10 -13 15434.1 3434.35   1
  10  -1 -13 8902.94 1447.87   1
   1 -10 -10 33598.2 3470.47   2
 -10   9 -10 40765.8 5384.05   1
  -1  -9 -10 34781.1 3742.36   2
  -9  10 -10 46013.5 5733.76   1
  10  -1 -10 31164.4 2749.00   1
   9   1 -10 33927.0 3004.60   1
 -10   9  -7 4050.24 1610.49   1
  10  -1  -7 2396.20 549.229   2
  -9  10  -7 2899.12 1379.36   1
   9   1  -7 2267.63 650.965   2
   9   1  -4 67237.0 3560.27   2
  10  -1  -4 64910.0 2889.28   2
 -10   9  -1 8679.45 1848.67   1
   9   1  -1 10159.9 1409.32   2
  -9  10  -1 13171.5 2466.81   1
  10  -1  -1 11304.8 1266.07   2
 -10   9   2 39693.8 2106.78   2
  -9  10   2 38977.4 2636.18   2
   9   1   2 37143.9 2759.92   2
  -9  10   2 30999.3 3235.82   1
  10  -1   2 36277.9 2540.48   2
 -10   9   2 36183.8 3211.97   1
  -9  10   5 17625.4 1964.14   1
  -9  10   5 21245.1 1896.35   2
 -10   9   5 19795.6 1311.48   2
   9   1   5 18729.0 2091.09   2
  -9  10   8 59246.4 3290.94   2
   0 -10 -23 694.363 904.731   2
 -10  10 -23 34.8690 715.092   1
 -10  10 -20 32087.4 5405.02   1
   0 -10 -20 25014.8 4117.23   2
  10   0 -20 23632.0 2639.59   1
  10   0 -17-95.1910 165.357   1
   0 -10 -17 318.762 897.652   2
  10   0 -14 17781.9 2165.28   1
   0 -10 -14 20420.1 3172.31   2
  10   0 -11-257.502 316.017   1
   0 -10 -11 658.662 655.993   2
  10   0  -8 220281. 6402.51   2
 -10  10  -8 284646. 13814.6   1
 -10  10  -5 1333.40 1146.14   1
  10   0  -5 201.328 256.980   2
  10   0  -2 76656.9 3529.81   2
 -10  10  -2 75191.2 5880.33   1
 -10  10   1 153.407 347.307   1
  10   0   1 556.882 317.784   2
 -10  10   4 96994.4 3645.25   2
 -10  10   4 97002.1 4829.98   1
  10   0   4 97859.4 4693.82   2
 -10  10   7 28.8313 149.057   2
   0  11 -23 414.083 588.758   1
 -11   0 -20 30678.6 5224.68   2
   0  11 -20 32568.9 3725.29   1
   0  11 -17-104.558 319.459   1
 -11   0 -17-863.188 1541.84   2
 -11   0 -14-518.972 1104.65   2
   0  11 -14 794.464 618.492   1
 -11   0 -11-581.932 818.942   2
   0  11 -11 271.213 372.481   1
 -11   0  -8 8148.20 1891.18   2
   0  11  -8 7212.88 1439.57   1
  11 -11  -8 8019.95 922.678   1
 -11   0  -5 102.683 328.520   2
   0  11  -5-341.785 508.328   1
  11 -11  -5-384.641 633.748   1
   0  11  -2 89156.5 5010.97   1
  11 -11  -2 66513.2 4915.92   1
   0  11   1-361.186 481.430   1
  11 -11   1-302.886 748.683   1
   0  11   4 22281.4 2498.76   1
   0  11   7 87.5395 233.646   1
   0  11  10 30092.4 2986.89   1
   0  11  13-186.619 500.813   1
   1  10 -24 29852.9 3875.81   1
   1  10 -21-1179.65 866.228   1
  -1  11 -21 1505.79 614.265   1
 -10  -1 -21-2229.95 2383.36   2
 -11   1 -21 655.849 437.350   2
 -10  -1 -18 46419.7 6208.99   2
  10 -11 -18 52451.0 3686.01   2
 -11   1 -18 42682.4 5848.32   2
   1  10 -18 47557.9 4167.72   1
  -1  11 -18 45061.9 4244.18   1
  -1  11 -15 3873.53 1155.21   1
 -10  -1 -15 4350.85 1576.93   2
 -11   1 -15 3487.21 1608.16   2
   1  10 -15 3980.40 1192.58   1
   1  10 -12 17574.8 2419.38   1
 -10  -1 -12 18154.9 3125.82   2
 -11   1 -12 17954.9 3070.18   2
  -1  11 -12 17184.3 2304.98   1
   1  10  -9 8703.11 1681.03   1
  -1  11  -9 8363.74 1568.78   1
 -10  -1  -9 9322.80 2029.28   2
 -11   1  -9 7996.62 1813.43   2
  11 -10  -9 8781.77 692.891   1
   1  10  -6 255103. 8665.45   1
 -10  -1  -6 299283. 10363.1   2
  -1  11  -6 251569. 8171.23   1
 -11   1  -6 302288. 10067.6   2
  11 -10  -6 244859. 7231.68   1
  10 -11  -6 302265. 7192.39   1
   1  10  -3 14373.8 2026.56   1
  10 -11  -3 14634.2 1989.25   1
  -1  11  -3 12961.9 1848.73   1
 -11   1  -3 15345.4 1991.37   2
  11 -10  -3 9382.48 1727.51   1
 -10  -1  -3 15579.9 2069.69   2
  -1  11   0 18314.5 2169.21   1
  10 -11   0 11511.2 2101.25   1
  11 -10   0 21188.2 3002.40   1
   1  10   0 16143.3 2147.30   1
  -1  11   3 5923.86 1211.20   1
  10 -11   3 4771.72 1410.75   1
   1  10   3 7123.53 1413.84   1
   1  10   6 90923.4 5166.90   1
  -1  11   6 91891.5 4835.58   1
  -1  11   9 6947.18 1335.73   1
  -1  11  12 100062. 5249.29   1
  -1  11  15 696.812 377.348   1
   2   9 -25 3048.44 1341.25   1
   2   9 -22 1724.07 688.275   1
  -2  11 -22 1453.65 760.267   1
  -9  -2 -22 1886.91 754.875   2
 -11   2 -22 2458.47 1346.82   2
   2   9 -19 9386.17 1880.82   1
  -9  -2 -19 12631.9 3094.41   2
 -11   2 -19 8723.60 2819.66   2
  -2  11 -19 11531.9 2254.34   1
   9 -11 -19 11943.9 2004.37   2
  11  -9 -16 17151.4 1585.04   2
  -9  -2 -16 17136.5 3382.36   2
   2   9 -16 17605.4 2456.98   1
 -11   2 -16 15724.9 3407.76   2
  -2  11 -16 14926.5 2397.23   1
   9 -11 -16 18185.6 2147.70   2
  -2  11 -13 7856.97 1616.43   1
 -11   2 -13 10785.8 2487.35   2
  -9  -2 -13 8685.64 2176.08   2
   2   9 -13 8831.67 1669.66   1
  -9  -2 -10 43118.7 4507.18   2
   2   9 -10 33304.5 3108.29   1
 -11   2 -10 36093.3 3993.48   2
  -2  11 -10 34158.9 3153.78   1
   9 -11  -7 2155.60 498.447   1
  -9  -2  -7 2520.48 956.311   2
   2   9  -7 1966.80 855.891   1
 -11   2  -7 1429.00 714.162   2
  -2  11  -7 2570.57 883.249   1
  11  -9  -7 1396.16 444.441   1
   2   9  -4 20577.5 2364.97   1
   9 -11  -4 23909.4 2347.49   1
  -2  11  -4 19825.3 2221.91   1
 -11   2  -4 21218.8 2394.51   2
  11  -9  -4 19523.1 2526.65   1
  -9  -2  -4 21225.7 2559.98   2
   2   9  -1 5220.77 1148.39   1
  -2  11  -1 5989.88 1193.73   1
   9 -11  -1 4352.56 1147.67   1
  11  -9  -1 8472.80 1914.22   1
  -2  11   2 12983.6 1740.70   1
   9 -11   2 8384.63 1775.57   1
   2   9   2 11701.7 1836.71   1
  -2  11   5 29093.0 2574.91   1
   2   9   5 27929.9 2837.10   1
  -2  11   8 44265.2 3189.45   1
  -2  11  11 17646.4 1989.50   1
  -2  11  14 860.179 413.432   1
  -2  11  17 8251.04 1413.25   1
   3   8 -26 6859.45 1917.28   1
   3   8 -23 2352.46 912.173   1
   8 -11 -23 4918.72 1554.05   2
  -8  -3 -23 2641.32 1092.04   2
  -3  11 -23 1858.09 709.189   1
   3   8 -20 7438.53 1652.21   1
  -3  11 -20 7549.99 1996.36   1
  -8  -3 -20 6248.43 2193.60   2
 -11   3 -20 3737.12 1725.77   2
   8 -11 -20 9282.29 1929.13   2
   8 -11 -17 16038.7 2267.11   2
  -8  -3 -17 18172.0 3621.43   2
   3   8 -17 15815.2 2287.88   1
 -11   3 -17 10248.1 2763.12   2
  -3  11 -17 13495.5 2347.05   1
  -3  11 -14 4253.75 1216.64   1
   8 -11 -14 4962.97 1139.55   2
  -8  -3 -14 3735.57 1524.05   2
   3   8 -14 4636.07 1230.41   1
 -11   3 -14 4190.78 1633.69   2
   3   8 -11 42809.5 3553.32   1
  -8  -3 -11 55508.4 5246.67   2
 -11   3 -11 44485.1 4689.23   2
  -3  11 -11 43213.6 3661.27   1
   3   8  -8 48750.4 3731.79   1
  -8  -3  -8 54561.3 4811.55   2
  -3  11  -8 46365.5 3571.82   1
 -11   3  -8 52923.4 4399.15   2
  -8  -3  -5 61993.8 4528.11   2
 -11   3  -5 66359.7 4216.55   2
  -3  11  -5 61497.0 3919.15   1
   8 -11  -5 69490.1 3590.09   1
  11  -8  -5 65324.9 4726.91   1
   3   8  -5 57864.9 4012.70   1
   8 -11  -2 7633.06 1465.78   1
   3   8  -2 6857.86 1370.23   1
 -11   3  -2 8512.99 1274.80   2
  -3  11  -2 7492.34 1314.69   1
  11  -8  -2 8038.51 1758.14   1
  11  -8   1 31302.3 3846.59   1
  -3  11   1 29278.0 3236.20   2
   8 -11   1 26224.2 3101.97   1
  -3  11   1 29387.6 2545.05   1
   3   8   1 26613.3 2771.57   1
  -3  11   4 19210.7 2009.64   1
   8 -11   4 14941.9 2545.59   1
  -3  11   7 12095.3 1573.51   1
  -3  11  10 52441.8 3174.35   1
  -3  11  13 6912.23 1125.67   1
  -3  11  16 14168.8 1644.94   1
   4   7 -27 2050.30 1066.66   1
  -4  11 -24 31195.5 4818.33   1
   7 -11 -24 31254.8 4140.25   2
   4   7 -24 21869.3 3098.01   1
 -11   4 -24 16579.7 4327.50   2
   4   7 -21 6198.31 1496.08   1
   7 -11 -21 7523.22 1781.31   2
  -7  -4 -21 5514.02 2012.64   2
 -11   4 -21 3372.59 1641.59   2
  -4  11 -21 5792.38 1984.80   1
   7 -11 -18 24011.7 3010.82   2
   4   7 -18 20920.8 2654.17   1
  -7  -4 -18 22657.5 4042.30   2
  -4  11 -18 17994.8 3084.15   1
   7 -11 -15 18465.2 2381.91   2
  11  -7 -15 17222.8 1342.10   2
   4   7 -15 18305.1 2368.01   1
  -7  -4 -15 19053.6 3358.84   2
 -11   4 -15 13569.4 3027.21   2
  -4  11 -15 15679.0 2554.74   1
  11  -7 -12 149310. 2727.18   1
   4   7 -12 147078. 6555.63   1
  -7  -4 -12 164907. 9213.64   2
 -11   4 -12 129889. 8331.27   2
  -4  11 -12 133680. 6844.43   1
   4   7  -9 34424.4 3132.06   1
  11  -7  -9 37621.8 2880.44   1
  -7  -4  -9 44441.2 4380.62   2
 -11   4  -9 37765.3 3961.82   2
  -4  11  -9 35162.1 3215.06   1
  -7  -4  -6 89417.3 5649.11   2
 -11   4  -6 85433.8 4960.54   2
  -4  11  -6 79414.7 4594.23   1
  11  -7  -6 88746.1 4818.21   1
   4   7  -6 77586.1 4677.41   1
  -4  11  -3 42382.3 3165.49   1
   4   7  -3 46834.2 3986.98   2
  11  -7  -3 44042.9 3705.27   1
 -11   4  -3 43224.3 2873.04   2
   4   7  -3 36690.0 3233.87   1
   7 -11  -3 46471.5 3328.67   1
   7 -11   0 84519.6 5226.15   1
  -4  11   0 78351.6 5100.27   2
   4   7   0 79368.4 5131.76   2
  -4  11   0 74464.8 3989.82   1
  11  -7   0 81943.6 5353.20   1
   4   7   0 69557.3 4434.45   1
 -11   4   0 74420.3 2752.71   2
   7 -11   3 36117.3 3917.66   1
  11  -7   3 39368.8 4013.36   1
  -4  11   3 39083.0 3588.41   2
  -4  11   3 34566.1 2567.93   1
  -4  11   6 201420. 6034.88   1
  -4  11   6 220939. 8422.26   2
  -4  11   9 28401.8 2151.92   1
  -4  11  12 49724.1 2848.57   1
  -4  11  15 10252.4 1205.67   1
   5   6 -25-520.469 856.741   1
   6 -11 -25 1215.89 915.977   2
  -5  11 -22 5512.77 2091.54   1
   5   6 -22 2950.94 962.547   1
   6 -11 -22 2978.44 1206.45   2
  -6  -5 -22 5511.75 2076.72   2
 -11   5 -22 4230.81 2071.20   2
  -6  -5 -19 1275.94 814.539   2
 -11   5 -19 438.544 683.437   2
  -5  11 -19 1854.17 910.498   1
   5   6 -19 2738.42 986.785   1
   5   6 -16 19990.7 2493.36   1
  -6  -5 -16 25082.8 3970.77   2
  11  -6 -16 20448.4 1645.02   2
   6 -11 -16 21993.4 2866.51   2
  -5  11 -16 18662.3 3158.32   1
  11  -6 -13 6056.74 733.452   1
  11  -6 -13 4967.81 489.349   2
  -6  -5 -13 7020.26 2043.78   2
   5   6 -13 5196.65 1307.50   1
 -11   5 -13 2541.45 933.502   2
  11  -6 -13 5158.94 783.077   1
  -5  11 -13 4387.29 1412.13   1
   6 -11 -13 6447.12 1390.84   2
  11  -6 -10 64305.0 3259.71   1
   5   6 -10 53814.5 3970.72   1
 -11   5 -10 46747.2 4695.90   2
  -5  11 -10 46743.1 4025.71   1
  -6  -5 -10 61075.8 5297.01   2
  -6  -5  -7 21964.6 2918.44   2
 -11   5  -7 20720.1 2635.93   2
  -5  11  -7 18232.6 2250.56   1
   5   6  -7 18798.3 2312.83   1
  11  -6  -7 21338.6 2053.87   1
 -11   5  -4 13563.7 1748.71   2
  -5  11  -4 13436.7 1820.93   1
   6 -11  -4 15640.3 1809.62   1
  11  -6  -4 13230.3 1757.71   1
   5   6  -4 12464.6 1872.48   1
   5   6  -4 15414.8 2218.14   2
   5   6  -1 54789.9 4123.28   2
 -11   5  -1 50730.3 2400.61   2
  -5  11  -1 52265.8 3426.71   1
  11  -6  -1 53797.3 3875.03   1
   6 -11  -1 55528.6 4035.21   1
   6 -11   2 72157.5 5234.85   1
   5   6   2 61925.6 4296.02   2
  -5  11   2 66297.2 3642.65   1
  11  -6   2 74816.3 4949.14   1
  -5  11   2 66383.1 4568.94   2
   6 -11   5 45271.4 4626.20   1
  -5  11   5 48125.3 2886.58   1
  -5  11   5 48790.6 3845.82   2
  11  -6   5 44166.3 4206.96   1
  -5  11   8 15488.9 1521.25   1
  -5  11   8 16479.8 2238.03   2
  -5  11  11 14854.7 1391.75   1
  -5  11  14 6955.07 846.638   1
  -5  11  14 7147.62 933.988   1
   6   5 -26-159.541 512.927   1
   5 -11 -26 1750.76 1066.39   2
   6   5 -23 283.621 228.687   1
  -6  11 -23 1156.02 1149.51   1
   5 -11 -23-30.2684 447.030   2
  -5  -6 -23-3.10001 934.432   2
  -5  -6 -20 20008.5 3932.79   2
   5 -11 -20 18541.8 3034.43   2
   6   5 -20 15569.8 2324.14   1
  -6  11 -20 20816.2 3873.98   1
 -11   6 -20 16096.0 4091.08   2
  -5  -6 -17 1415.85 1067.88   2
   6   5 -17 1912.25 774.922   1
  11  -5 -17 1792.84 518.169   2
 -11   6 -17 1646.07 1446.74   2
  -6  11 -17 2129.38 1133.49   1
   5 -11 -17 1357.14 676.541   2
  11  -5 -14 6928.08 913.621   1
   5 -11 -14 4679.07 1279.39   2
  -5  -6 -14 6838.45 2112.04   2
  11  -5 -14 5103.18 690.523   2
   6   5 -14 4880.46 1194.62   1
  -6  11 -14 2986.12 1226.01   1
   6   5 -11 14583.5 2071.93   1
  -5  -6 -11 17595.4 2936.32   2
  11  -5 -11 16266.8 1573.05   1
  -6  11 -11 12763.4 2512.01   1
  11  -5 -11 18227.5 1770.06   1
  -5  -6  -8 17449.6 2651.51   2
 -11   6  -8 12379.5 2312.73   2
  11  -5  -8 18229.3 1877.39   1
  -6  11  -8 15137.9 2379.45   1
   6   5  -8 14398.4 1991.73   1
   6   5  -5 46362.1 3715.16   2
  11  -5  -5 50092.7 3328.54   1
 -11   6  -5 42294.5 3422.05   2
  -6  11  -5 42283.7 3561.31   1
   6   5  -5 42479.4 3552.23   1
  -5  -6  -5 48405.0 3976.53   2
   6   5  -2 64866.4 4345.60   2
 -11   6  -2 65877.9 3143.86   2
  -6  11  -2 59942.1 3878.07   1
   5 -11  -2 68278.6 4292.58   1
  11  -5  -2 70368.6 4193.35   1
  11  -5   1 54213.0 3834.22   1
  -6  11   1 55322.4 3973.00   2
   6   5   1 54502.2 3890.48   2
  -6  11   1 47319.5 3197.32   1
   5 -11   1 61880.2 4599.04   1
  -6  11   4 18112.6 2251.59   2
   6   5   4 17009.7 2219.68   2
  -6  11   4 17856.8 1852.41   1
  11  -5   4 16269.3 2271.80   1
   5 -11   4 18413.1 2850.97   1
  -6  11   7 21950.9 2516.34   2
  -6  11   7 19163.0 1767.42   1
  -6  11  10 59936.3 4252.11   2
  -6  11  10 57239.0 2661.22   1
  -6  11  13 5374.68 634.366   1
  -6  11  13 4395.11 568.228   1
   4 -11 -24 42807.9 5412.67   2
 -11   7 -24 43487.7 6951.52   1
  -7  11 -24 60183.1 7309.23   1
   7   4 -24 36527.1 3847.95   1
 -11   7 -24 63008.2 8771.76   2
   4 -11 -21 6985.71 1958.00   2
  -7  11 -21 9843.71 2951.20   1
  -4  -7 -21 7349.72 2424.62   2
 -11   7 -21 4125.36 1221.16   1
   7   4 -21 7063.38 1598.52   1
  -4  -7 -18 49534.2 5836.07   2
  -7  11 -18 52999.0 6343.22   1
   7   4 -18 41381.9 3608.13   1
   4 -11 -18 44755.1 4649.58   2
  11  -4 -18 39377.4 3040.03   2
 -11   7 -18 39289.7 5968.47   1
  -7  11 -15 9977.72 2536.55   1
  11  -4 -15 9283.22 1224.28   1
   7   4 -15 9060.21 1610.09   1
 -11   7 -15 3495.84 1035.92   1
   4 -11 -15 8381.14 1843.60   2
  -4  -7 -15 11235.5 2649.67   2
  11  -4 -15 8218.08 1128.38   2
   7   4 -12 36964.2 3296.45   1
  -7  11 -12 35120.8 4675.24   1
   4 -11 -12 40943.7 3675.59   2
  -4  -7 -12 43998.2 4712.25   2
  11  -4 -12 40621.3 1809.04   2
  11  -4 -12 43619.0 2816.28   1
 -11   7  -9 15829.4 3090.54   1
  -4  -7  -9 27269.9 3367.56   2
   7   4  -9 20358.0 2416.76   1
  -7  11  -9 23861.0 3531.51   1
   7   4  -6 220822. 7862.07   2
  -4  -7  -6 215923. 8588.52   2
   7   4  -6 204202. 7696.42   1
  -7  11  -6 213530. 9380.30   1
   7   4  -3 38788.1 3228.81   2
  -7  11  -3 33936.1 3380.05   1
  11  -4  -3 37823.0 3028.52   1
   7   4   0 65400.1 4104.74   2
 -11   7   0 66411.9 2327.39   2
  11  -4   0 73911.8 4350.70   1
  -7  11   0 67686.1 4396.98   1
   4 -11   0 75842.7 4942.82   1
   7   4   3 40713.8 3297.16   2
  11  -4   3 42810.5 3511.61   1
  -7  11   3 42713.3 3225.48   1
   4 -11   3 50900.8 4487.95   1
  -7  11   6 81859.8 4086.72   1
  -7  11   9 40958.8 3313.50   2
  -7  11   9 31430.0 2342.69   1
  -7  11  12 153737. 6888.36   2
   3 -11 -25 5575.78 2074.19   2
   3 -11 -22 17408.6 3480.14   2
  -3  -8 -22 16389.4 3711.73   2
   8   3 -22 13814.5 2237.53   1
  -8  11 -22 20716.9 4406.16   1
 -11   8 -22 19095.5 4367.73   1
   3 -11 -19 5322.61 1771.38   2
  -3  -8 -19 5360.86 2014.95   2
  -8  11 -19 7743.57 2682.00   1
 -11   8 -19 5192.63 2042.69   1
   8   3 -19 5242.13 1296.79   1
   8   3 -16 15210.7 2133.69   1
   3 -11 -16 16102.9 2695.71   2
  -3  -8 -16 16372.5 3180.46   2
  -8  11 -16 21694.5 4038.78   1
 -11   8 -16 14687.6 3663.56   1
  -8  11 -13 5688.90 1899.02   1
   8   3 -13 4752.21 1161.04   1
  -3  -8 -13 5327.17 1712.67   2
 -11   8 -13 3265.21 1351.99   1
   3 -11 -13 5537.02 1462.95   2
  -8  11 -10 58055.0 6019.70   1
  11  -3 -10 44579.1 1865.25   2
  -3  -8 -10 53564.1 4858.17   2
 -11   8 -10 37153.5 5101.76   1
   8   3 -10 46072.3 3658.28   1
  -3  -8  -7 11931.1 2072.46   2
   8   3  -7 12748.4 1834.96   2
  11  -3  -7 10657.0 737.478   2
 -11   8  -7 6636.64 1760.68   1
   8   3  -7 10296.1 1714.93   1
  -8  11  -7 10839.3 2479.79   1
  -8  11  -4 22715.5 3387.76   1
   8   3  -4 23911.6 2446.59   2
 -11   8  -4 22594.1 3327.43   1
  -8  11  -1 26583.6 3429.24   1
   8   3  -1 26824.1 2545.57   2
  11  -3  -1 28497.8 2784.43   1
   3 -11   2 6966.42 1608.65   1
   8   3   2 5278.27 1157.47   2
  11  -3   2 6034.15 1382.88   1
  -8  11   2 3798.84 1094.98   1
  -8  11   5 45880.1 3725.18   1
   8   3   5 57323.1 3916.92   2
  -8  11   8 41518.4 2696.64   1
  -9  11 -23 9529.74 3231.42   1
  -2  -9 -23 3951.47 1893.31   2
 -11   9 -23 6504.49 2811.41   1
   2 -11 -23 5785.33 2186.85   2
   2 -11 -20 14146.4 2954.76   2
   9   2 -20 13603.3 2115.00   1
  -2  -9 -20 14014.6 3273.47   2
  -9  11 -20 21111.6 4489.38   1
 -11   9 -20 22654.2 4731.94   1
 -11   9 -17 11067.6 3396.96   1
   2 -11 -17 11100.1 2439.59   2
  -2  -9 -17 9841.97 2473.53   2
  11  -2 -17 10251.3 1534.67   1
   9   2 -17 8191.63 1532.70   1
  -9  11 -17 14136.6 3476.48   1
  11  -2 -14 764.304 417.422   1
   2 -11 -14 955.576 653.583   2
   9   2 -14 1328.00 651.271   1
  -2  -9 -14 746.826 652.920   2
  -9  11 -14 2262.13 1198.46   1
 -11   9 -14 151.701 697.103   1
   2 -11 -11 17574.6 2547.83   2
  -2  -9 -11 21856.1 3197.95   2
  -9  11 -11 25352.5 4266.69   1
 -11   9 -11 19796.0 3773.44   1
  11  -2 -11 17456.6 1505.93   2
  11  -2 -11 18130.5 2085.10   1
   9   2 -11 17896.8 2265.10   1
   9   2  -8 47217.8 3427.82   2
  11  -2  -8 39354.3 2023.83   2
 -11   9  -8 39831.7 5190.06   1
   9   2  -8 42687.0 3566.03   1
   9   2  -5 25478.1 2448.87   2
 -11   9  -5 18968.7 3205.38   1
  11  -2  -5 23091.3 1502.90   2
  -9  11  -2 13525.0 2644.06   1
   9   2  -2 12032.4 1647.56   2
  11  -2  -2 13638.9 1277.95   2
 -11   9  -2 11000.7 2150.78   1
  -9  11   1 5901.93 1145.95   2
  -9  11   1 5663.33 1462.72   1
   9   2   1 5434.03 1079.39   2
 -11   9   1 6367.95 1475.83   1
  -9  11   4 20244.7 2073.84   2
  -9  11   4 14963.3 2187.49   1
   9   2   4 17671.0 2122.41   2
  -9  11   7 1790.67 473.498   1
  -9  11   7 2201.02 709.737   2
  -9  11  10 41437.0 3141.24   2
   1 -11 -21 1391.39 906.624   2
  -1 -10 -21 731.491 1099.54   2
  10   1 -21 1060.93 701.217   1
 -11  10 -21 310.667 912.458   1
  10   1 -18 21264.4 2488.47   1
   1 -11 -18 26210.0 3985.79   2
  -1 -10 -18 29242.6 4435.41   2
  11  -1 -18 26203.0 2639.52   1
 -11  10 -18 39297.8 6285.78   1
 -10  11 -18 39745.3 6020.20   1
 -10  11 -15 2733.67 1943.91   1
   1 -11 -15 1115.26 846.858   2
  11  -1 -15 1338.82 634.573   1
  -1 -10 -15 383.189 470.852   2
  10   1 -15 821.199 611.311   1
 -11  10 -15 2426.65 1765.94   1
   1 -11 -12 111656. 6866.22   2
  -1 -10 -12 123340. 7633.16   2
  11  -1 -12 117073. 5572.98   1
  10   1 -12 111742. 5738.37   1
  10   1  -9 7514.38 1507.51   1
  10   1  -9 6273.69 1187.35   2
 -11  10  -9 11325.9 2922.42   1
  11  -1  -9 7799.38 1404.87   1
 -10  11  -9 10344.8 2793.78   1
  11  -1  -9 7271.00 1082.08   2
 -11  10  -6 83837.9 7005.22   1
  10   1  -6 85222.9 4269.34   2
  11  -1  -6 79689.8 3357.11   2
  10   1  -3 6993.10 1208.71   2
  11  -1  -3 7014.99 1005.79   2
 -11  10  -3 4429.83 1445.07   1
 -10  11  -3 7511.81 2143.75   1
  10   1   0 20659.9 2071.90   2
 -11  10   0 19190.2 2727.47   1
  11  -1   0 21928.7 1911.39   2
 -10  11   0 21564.4 3047.94   1
 -11  10   3 14922.6 2112.40   1
 -10  11   3 15431.1 1708.95   2
 -11  10   3 13681.8 1212.37   2
  10   1   3 14821.8 1828.47   2
 -10  11   3 13849.9 2084.33   1
 -10  11   6 270806. 6857.47   2
 -10  11   6 275455. 7268.09   1
  10   1   6 279399. 8627.34   2
 -10  11   9 9047.86 1406.02   2
   0 -11 -22 3393.60 1865.93   2
   0 -11 -19 681.359 1022.43   2
 -11  11 -19-906.904 486.020   1
  11   0 -19 54.4311 224.175   1
  11   0 -16 65156.8 4381.38   1
   0 -11 -16 67977.0 6297.24   2
   0 -11 -13-48.3230 282.673   2
 -11  11 -13 259.503 1178.04   1
  11   0 -13-165.527 357.722   1
  11   0 -10 33853.5 2655.21   2
  11   0 -10 33077.9 3160.39   1
  11   0  -7 47.6140 237.235   2
 -11  11  -7 1375.28 1225.06   1
  11   0  -4 20291.0 1934.42   2
 -11  11  -4 24368.4 3771.53   1
 -11  11  -1-308.886 660.150   1
  11   0  -1 104.561 123.921   2
 -11  11   2 86744.8 5595.18   1
  11   0   2 93879.0 4442.75   2
 -11  11   2 100591. 4140.89   2
 -11  11   5 82.8484 132.662   2
 -11  11   5 408.663 483.373   1
   0  12 -21-959.778 867.122   1
 -12   0 -21-1640.23 1965.52   2
 -12   0 -18 21984.8 4333.56   2
   0  12 -18 22204.0 2930.03   1
 -12   0 -15-692.076 786.202   2
   0  12 -15-425.331 362.930   1
 -12   0 -12 23320.8 3686.69   2
   0  12 -12 18910.8 2582.16   1
 -12   0  -9 203.256 393.065   2
   0  12  -9-471.690 566.560   1
   0  12  -6 84264.7 5098.39   1
  12 -12  -6 90089.1 4497.23   1
 -12   0  -6 97903.7 6196.31   2
   0  12  -3 159.963 244.124   1
  12 -12  -3-82.6835 251.491   1
   0  12   0 45386.6 3708.85   1
  12 -12   0 27443.2 3519.12   1
   0  12   3 34.3263 383.612   1
   0  12   6 33770.5 3215.55   1
   0  12   9-233.147 444.090   1
   0  12  12 94430.5 5745.66   1
   0  12  15-248.216 578.903   1
   0  12  18 8259.37 1695.14   1
 -12   1 -22 11869.7 3387.53   2
   1  11 -22 17675.3 2854.19   1
   1  11 -19 302.576 483.104   1
  -1  12 -19-772.393 771.623   1
 -11  -1 -19-776.624 1458.66   2
 -12   1 -19-733.533 1509.89   2
  -1  12 -16-141.362 361.958   1
 -11  -1 -16 165.304 881.320   2
 -12   1 -16-1933.16 1708.13   2
   1  11 -16-204.972 470.190   1
 -11  -1 -13 1854.44 814.105   2
 -12   1 -13 1228.03 882.547   2
   1  11 -13 1781.75 669.284   1
  -1  12 -13 2714.23 1000.98   1
   1  11 -10 57900.1 4244.28   1
 -11  -1 -10 66415.2 5835.57   2
 -12   1 -10 61823.9 5528.99   2
  -1  12 -10 60025.4 4343.45   1
   1  11  -7 7375.32 1597.77   1
  12 -11  -7 8678.52 1218.17   1
 -11  -1  -7 9989.49 2095.29   2
  -1  12  -7 8169.68 1537.34   1
 -12   1  -7 10520.4 2081.24   2
  11 -12  -7 9020.76 1202.75   1
   1  11  -4 15983.0 2231.86   1
  11 -12  -4 14116.2 1981.28   1
  -1  12  -4 16993.2 2223.75   1
 -11  -1  -4 14708.4 2198.40   2
 -12   1  -4 17750.9 2337.43   2
  12 -11  -4 10249.6 1844.06   1
   1  11  -1 25175.4 2757.63   1
  -1  12  -1 27203.6 2772.53   1
  11 -12  -1 18738.7 2636.44   1
  12 -11  -1 24810.4 3269.51   1
  12 -11   2 5901.77 1721.67   1
   1  11   2 3962.68 1024.83   1
  -1  12   2 2729.38 835.685   1
   1  11   5 18096.1 2362.74   1
  -1  12   5 21124.3 2430.00   1
   1  11   8 46995.3 3930.60   1
  -1  12   8 48717.0 3715.29   1
   1  11  11 15904.7 2299.94   1
  -1  12  11 16899.4 2228.33   1
  -1  12  14 1472.23 632.848   1
  -1  12  17 5835.56 1363.88   1
   2  10 -23 5570.58 1401.87   1
   2  10 -20 8972.23 1858.28   1
  -2  12 -20 8636.48 2035.89   1
 -10  -2 -20 9194.80 2837.84   2
 -12   2 -20 7136.26 2527.46   2
  -2  12 -17 10292.5 1989.22   1
   2  10 -17 10772.6 1972.20   1
 -10  -2 -17 10934.4 2885.24   2
 -12   2 -17 10217.7 2820.36   2
  -2  12 -14 2126.32 869.193   1
 -10  -2 -14 2820.65 1285.18   2
 -12   2 -14 838.232 788.402   2
   2  10 -14 2651.74 971.526   1
   2  10 -11 4763.23 1276.46   1
 -12   2 -11 4207.44 1406.85   2
  -2  12 -11 3644.65 1124.30   1
 -10  -2 -11 3811.02 1540.88   2
  12 -10  -8 8172.34 1217.54   1
 -10  -2  -8 8356.74 1914.77   2
  -2  12  -8 8478.85 1540.34   1
   2  10  -8 7900.65 1579.17   1
 -12   2  -8 7811.70 1802.73   2
  12 -10  -5 1277.59 589.609   1
  10 -12  -5 3910.14 932.056   1
   2  10  -5 3039.09 925.740   1
 -10  -2  -5 3314.43 1121.34   2
 -12   2  -5 3658.75 1058.01   2
  -2  12  -5 3498.78 982.572   1
  10 -12  -2 56910.9 4372.17   1
  -2  12  -2 54970.9 3809.58   1
 -12   2  -2 63365.8 3732.66   2
   2  10  -2 58784.9 4248.79   1
  -2  12   1 10219.9 1661.33   1
  10 -12   1 5287.57 1290.61   1
   2  10   1 8931.47 1618.46   1
   2  10   4 755.929 390.441   1
  -2  12   4 1362.32 592.315   1
  -2  12   7 5562.90 1196.15   1
   2  10   7 4354.70 1174.80   1
  -2  12  10 41997.4 3313.77   1
  -2  12  13 9981.36 1606.04   1
  -2  12  16 12000.2 1767.53   1
   3   9 -24 26121.9 3494.95   1
   3   9 -21 1675.37 774.576   1
  -9  -3 -21 462.555 888.702   2
  -3  12 -21 786.857 390.635   1
 -12   3 -21-163.623 822.523   2
   9 -12 -18 12192.5 1993.25   2
   3   9 -18 11719.9 2052.35   1
  -9  -3 -18 11455.1 2950.63   2
 -12   3 -18 9154.97 2739.88   2
  -3  12 -18 11630.0 2325.37   1
  -3  12 -15 812.370 274.690   1
  -9  -3 -15 1794.96 1041.32   2
 -12   3 -15 2046.55 1328.91   2
   3   9 -15 1183.85 703.982   1
  -9  -3 -12 115213. 8091.88   2
 -12   3 -12 96891.3 7295.05   2
   3   9 -12 98492.7 5550.54   1
  -3  12 -12 92702.3 5490.32   1
   3   9  -9 22314.1 2717.76   1
  -9  -3  -9 23760.2 3383.87   2
 -12   3  -9 21591.1 3001.20   2
  -3  12  -9 22208.1 2587.38   1
  12  -9  -9 16777.2 1620.49   1
   3   9  -6 44204.3 3674.12   1
  -9  -3  -6 52529.9 4509.85   2
 -12   3  -6 49188.5 3938.90   2
  -3  12  -6 44262.5 3466.97   1
  12  -9  -6 45966.8 3777.76   1
   9 -12  -6 50983.9 3057.77   1
 -12   3  -3 31254.0 2667.25   2
  -3  12  -3 29615.8 2758.52   1
  12  -9  -3 37560.4 3945.13   1
   3   9  -3 30880.2 3086.10   1
   9 -12  -3 33525.4 3095.61   1
   9 -12   0 66316.9 5082.30   1
  -3  12   0 69665.4 4088.06   1
   3   9   0 64470.1 4530.85   1
  -3  12   3 20164.6 2151.85   1
   9 -12   3 13186.9 2473.27   1
   3   9   3 19170.1 2488.87   1
  12  -9   3 24387.8 3508.85   1
  -3  12   6 77711.8 4270.19   1
  -3  12   9 18152.5 2002.78   1
  -3  12  12 56995.8 3593.95   1
  -3  12  15 17255.1 1915.09   1
   4   8 -25 3106.34 1160.46   1
   4   8 -22 8559.46 1855.96   1
   8 -12 -22 10370.2 2171.74   2
  -8  -4 -22 8887.89 2787.52   2
 -12   4 -22 4226.54 2085.25   2
  -4  12 -22 6464.47 2130.75   1
   8 -12 -19 10492.4 1993.20   2
   4   8 -19 11062.5 1988.56   1
  -8  -4 -19 11179.5 2971.73   2
  -4  12 -19 7456.25 2108.49   1
 -12   4 -19 3003.18 1427.18   2
   8 -12 -16 11086.0 1868.77   2
   4   8 -16 11549.9 1938.35   1
  -8  -4 -16 10850.0 2681.01   2
 -12   4 -16 7415.83 2286.62   2
  -4  12 -16 11869.0 2309.86   1
   4   8 -13 21332.1 2633.76   1
  -8  -4 -13 25861.8 3946.89   2
 -12   4 -13 19541.6 3439.54   2
  -4  12 -13 17913.7 2529.92   1
   4   8 -10 49916.9 3981.31   1
  -8  -4 -10 59724.5 5431.71   2
 -12   4 -10 54158.4 5025.10   2
  -4  12 -10 47175.1 3827.99   1
   4   8  -7 32753.1 3198.59   1
  12  -8  -7 30837.3 3160.11   1
  -8  -4  -7 38507.2 3984.29   2
 -12   4  -7 32592.7 3295.02   2
  -4  12  -7 33975.4 3123.55   1
   8 -12  -4 5655.59 1174.27   1
   4   8  -4 4326.60 1037.91   1
 -12   4  -4 5329.85 1103.08   2
  -4  12  -4 5974.40 1273.24   1
  12  -8  -4 6467.08 1497.95   1
  12  -8  -1 27293.7 3409.58   1
 -12   4  -1 25998.6 1942.21   2
  -4  12  -1 24201.6 2413.93   1
   4   8  -1 26325.8 2837.80   1
   8 -12  -1 27052.7 3033.69   1
  12  -8   2 108796. 7195.86   1
   8 -12   2 98019.3 6583.90   1
   4   8   2 93948.6 5464.14   1
  -4  12   2 98276.6 4588.63   1
  -4  12   5 52068.8 3280.76   1
  -4  12   8 5550.17 1071.81   1
  -4  12  11 42715.5 2852.35   1
  -4  12  14 15716.6 1648.81   1
   5   7 -26 7378.34 1846.10   1
  -5  12 -23 10545.7 2860.77   1
   5   7 -23 7489.22 1694.01   1
   7 -12 -23 10476.2 2406.99   2
 -12   5 -23 6069.65 2583.02   2
   7 -12 -20 30.3122 625.842   2
  -7  -5 -20-486.463 958.064   2
 -12   5 -20-1799.68 1487.74   2
  -5  12 -20-1562.72 1263.03   1
   5   7 -20 776.372 717.481   1
   7 -12 -17 22852.9 2874.54   2
  -7  -5 -17 27734.3 4450.48   2
   5   7 -17 22117.2 2775.49   1
 -12   5 -17 12699.7 3173.80   2
  -5  12 -17 21410.8 3395.46   1
   5   7 -14 9908.52 1776.16   1
  -5  12 -14 7741.50 1878.69   1
  -7  -5 -14 9880.52 2517.37   2
 -12   5 -14 4963.09 1804.10   2
   5   7 -11 19670.3 2477.15   1
  -7  -5 -11 23341.4 3489.36   2
 -12   5 -11 15209.9 2772.11   2
  -5  12 -11 14085.7 2250.21   1
  12  -7 -11 19892.2 1524.98   1
  12  -7 -11 20887.9 2055.31   1
  -7  -5  -8 34784.2 3949.36   2
  12  -7  -8 35593.2 3007.99   1
 -12   5  -8 30130.2 3405.02   2
  -5  12  -8 26986.9 2916.94   1
   5   7  -8 31148.6 3107.68   1
  -5  12  -5 4553.66 1119.70   1
   5   7  -5 4376.69 1110.84   1
  -7  -5  -5 5355.52 1418.36   2
  12  -7  -5 7612.08 1565.16   1
 -12   5  -5 5803.74 1219.44   2
 -12   5  -2 40127.5 2521.88   2
  12  -7  -2 43702.1 3790.96   1
  -5  12  -2 37420.5 3067.75   1
   5   7  -2 33272.7 3223.97   1
   7 -12  -2 42775.0 3580.49   1
  -5  12   1 8344.12 1741.75   2
  12  -7   1 9261.15 1852.41   1
  -5  12   1 9677.69 1470.30   1
   7 -12   1 9815.47 1952.38   1
  -5  12   4 21028.0 2733.16   2
  -5  12   4 19690.1 2020.62   1
  -5  12   7 12828.7 1522.27   1
  -5  12  10 89339.9 3791.28   1
  -5  12  13 26915.8 1947.27   1
   6 -12 -24 42746.2 5098.92   2
 -12   6 -24 37312.2 6580.51   2
   6   6 -24 32216.4 3629.03   1
  -6  12 -21-580.542 385.783   1
   6 -12 -21 196.765 394.525   2
  -6  -6 -21-858.063 1155.30   2
   6   6 -21 444.410 301.612   1
   6 -12 -18 16147.5 2660.12   2
  -6  -6 -18 18753.4 3709.14   2
   6   6 -18 16176.7 2362.24   1
 -12   6 -18 10560.5 3164.53   2
  -6  12 -18 11984.6 2775.71   1
   6 -12 -15 3343.26 1078.82   2
  -6  -6 -15 3943.47 1605.12   2
   6   6 -15 3467.18 1062.27   1
  -6  12 -15 2101.52 990.844   1
 -12   6 -15 1722.33 996.957   2
  12  -6 -12 108627. 4439.17   1
   6   6 -12 87515.7 5289.95   1
  -6  -6 -12 99781.1 7377.75   2
  -6  12 -12 79653.5 5975.25   1
  12  -6 -12 100662. 3707.17   1
  12  -6  -9 12148.0 1615.02   1
  -6  -6  -9 12880.5 2412.87   2
  -6  12  -9 9148.70 1786.32   1
 -12   6  -9 8730.24 1922.80   2
   6   6  -9 10714.1 1807.75   1
  12  -6  -6 74497.6 4219.20   1
  -6  -6  -6 68529.9 5054.97   2
 -12   6  -6 64521.3 4456.58   2
  -6  12  -6 63165.9 4457.51   1
   6   6  -6 62737.6 4397.49   1
 -12   6  -3 11993.6 1495.74   2
  -6  12  -3 11500.3 1744.24   1
   6 -12  -3 13916.7 1938.23   1
   6   6  -3 10984.6 1828.85   1
  12  -6  -3 12571.9 1824.07   1
  -6  12   0 94648.6 5696.42   2
 -12   6   0 85639.3 2381.20   2
  -6  12   0 93271.5 4761.26   1
  12  -6   0 98740.1 5471.42   1
   6 -12   0 105289. 6103.89   1
  -6  12   3 13920.5 2167.48   2
  -6  12   3 13510.3 1650.96   1
   6 -12   3 14858.3 2636.75   1
  -6  12   6 68189.0 4659.98   2
  -6  12   6 68460.4 3568.22   1
  -6  12   9 13325.7 2042.13   2
  -6  12   9 13355.1 1468.69   1
  -6  12  12 94459.6 3453.94   1
   7   5 -25 5090.78 1287.58   1
   5 -12 -25 9621.73 2646.85   2
   5 -12 -22 32640.8 4392.37   2
  -5  -7 -22 33875.7 5593.59   2
  -7  12 -22 44755.9 5988.03   1
   7   5 -22 29802.3 3337.74   1
 -12   7 -22 36725.4 6437.57   2
  -7  12 -19 28590.3 4584.97   1
   5 -12 -19 25788.0 3625.27   2
  -5  -7 -19 27910.5 4697.85   2
   7   5 -19 23600.3 2860.25   1
 -12   7 -19 23230.7 5102.28   2
   5 -12 -16 1080.58 665.278   2
  -5  -7 -16 1211.73 901.452   2
   7   5 -16 809.971 569.686   1
  -7  12 -16 731.289 403.630   1
  -7  12 -13 24903.6 3834.74   1
   7   5 -13 26311.6 2869.81   1
  12  -5 -13 31409.2 2442.71   1
  -5  -7 -13 34935.0 4444.36   2
  12  -5 -13 30230.5 2237.82   1
  -5  -7 -10 99829.0 6932.59   2
  12  -5 -10 100300. 4638.63   1
  -7  12 -10 80558.8 6388.02   1
   7   5 -10 82653.1 5127.76   1
  -5  -7  -7 12424.5 2224.35   2
 -12   7  -7 10404.1 1964.91   2
  12  -5  -7 13583.6 1768.55   1
  -7  12  -7 10974.0 2141.07   1
   7   5  -7 10468.1 1847.77   1
  12  -5  -4 24156.8 2495.33   1
 -12   7  -4 21812.9 2286.11   2
  -7  12  -4 20618.2 2641.68   1
   7   5  -4 19594.6 2484.54   1
   7   5  -4 24130.4 2754.79   2
  12  -5  -1 8127.49 1516.00   1
  -7  12  -1 7153.08 1389.22   1
   7   5  -1 8713.82 1629.84   2
 -12   7  -1 8942.98 976.918   2
   5 -12  -1 8929.18 1700.08   1
  -7  12   2 40946.5 3609.38   2
  -7  12   2 33900.6 2881.21   1
   5 -12   2 42600.7 4121.37   1
  -7  12   5 5442.47 1014.90   1
  -7  12   5 6055.98 1344.10   2
  -7  12   8 38543.0 3438.80   2
  -7  12   8 33598.3 2462.51   1
  -7  12  11 19592.4 2537.74   2
  -7  12  11 13933.8 1431.96   1
   8   4 -23 7399.75 1612.93   1
   4 -12 -23 11423.1 2923.63   2
   4 -12 -20 5351.17 1859.90   2
  -8  12 -20 10822.6 3151.56   1
  -4  -8 -20 7922.77 2566.42   2
 -12   8 -20 6057.85 1432.62   1
   8   4 -20 6965.20 1604.63   1
   4 -12 -17 18187.2 2980.46   2
  -4  -8 -17 20065.6 3734.29   2
  -8  12 -17 20790.1 4018.65   1
 -12   8 -17 17420.2 3780.53   1
   8   4 -17 17596.4 2362.71   1
   8   4 -14 13311.6 2056.73   1
  -8  12 -14 15917.6 3445.68   1
   4 -12 -14 13788.4 2346.68   2
  -4  -8 -14 14277.8 2923.55   2
 -12   8 -14 8911.84 2490.60   1
  12  -4 -14 12605.2 1111.53   2
  -8  12 -11 42269.3 5072.41   1
  -4  -8 -11 42636.1 4626.06   2
   8   4 -11 38328.8 3497.52   1
 -12   8  -8 3604.87 1358.86   1
   8   4  -8 7448.97 1497.98   1
   8   4  -8 8462.54 1630.53   2
  -4  -8  -8 8360.74 1840.45   2
  -8  12  -8 8721.15 2310.38   1
  12  -4  -5 54719.8 3754.12   1
   8   4  -5 49580.8 3887.13   2
   8   4  -5 44343.3 3770.16   1
  -8  12  -5 46047.5 4714.37   1
   8   4  -2 101364. 5449.65   2
 -12   8  -2 97072.2 4295.51   2
  12  -4  -2 108228. 5523.95   1
  -8  12  -2 97087.8 6450.18   1
  -8  12   1 26673.4 2768.53   2
   8   4   1 26782.1 2825.26   2
   4 -12   1 30410.9 3409.85   1
  -8  12   1 21937.2 2816.38   1
  -8  12   4 7948.79 1480.11   2
  -8  12   4 5720.10 1344.98   1
  -8  12   7 25673.2 2623.99   1
  -8  12   7 36783.2 3204.83   2
  -8  12  10 37124.5 2268.08   1
  -8  12  10 53333.9 3999.22   2
  -8  12  13 29667.0 3228.56   2
   3 -12 -24 43631.5 5764.07   2
 -12   9 -21 1048.83 1192.61   1
   3 -12 -21 3848.17 1618.19   2
  -3  -9 -21 3965.68 1935.22   2
   9   3 -21 3703.91 1178.70   1
  -9  12 -21 4215.51 2180.22   1
  -3  -9 -18 21829.8 4048.26   2
   3 -12 -18 20482.3 3400.53   2
   9   3 -18 17999.0 2403.22   1
  -9  12 -18 30321.4 5143.74   1
 -12   9 -18 19285.7 4309.01   1
  12  -3 -15 18998.9 2070.56   1
   9   3 -15 17924.5 2378.85   1
   3 -12 -15 16989.9 2779.15   2
  -3  -9 -15 20422.4 3554.07   2
  -9  12 -15 25821.5 4376.46   1
 -12   9 -15 19105.9 4018.63   1
  -9  12 -12 72651.8 7203.36   1
  -3  -9 -12 65819.5 5835.24   2
 -12   9 -12 50503.5 6424.12   1
  12  -3 -12 58925.9 3758.69   1
   9   3 -12 57871.3 4247.21   1
   9   3  -9 19455.6 2412.84   2
  -9  12  -9 20644.8 3649.39   1
  12  -3  -9 15907.9 970.501   2
 -12   9  -9 12047.8 2685.47   1
  -3  -9  -9 20489.0 3012.46   2
   9   3  -9 18871.9 2451.81   1
  -9  12  -6 100622. 7778.17   1
   9   3  -6 92098.2 5086.61   2
  12  -3  -6 77842.1 2192.58   2
   9   3  -6 87577.5 5322.61   1
  -9  12  -3 19153.2 3231.43   1
 -12   9  -3 16660.6 2836.58   1
   9   3  -3 20308.2 2341.70   2
  -9  12   0 69387.9 5691.83   1
   9   3   0 67181.6 4223.41   2
  -9  12   3 29891.2 3426.07   1
   9   3   3 29557.6 2816.59   2
  -9  12   6 38966.5 3310.17   1
  -9  12   9 18621.7 1522.96   1
  -9  12  12 110721. 5940.87   2
   2 -12 -22 5739.85 2092.93   2
  -2 -10 -22 6241.86 2409.83   2
  -2 -10 -19 19476.3 3797.89   2
 -12  10 -19 22942.9 4753.97   1
  10   2 -19 16622.8 2350.67   1
   2 -12 -19 19555.6 3524.16   2
 -10  12 -19 26893.8 4991.50   1
  12  -2 -16 12927.3 1873.13   1
  10   2 -16 12938.5 2041.94   1
 -12  10 -16 19124.5 4294.39   1
   2 -12 -16 13208.7 2614.83   2
  -2 -10 -16 14053.7 2924.89   2
 -10  12 -16 19564.0 4115.61   1
 -12  10 -13 11070.3 3170.02   1
   2 -12 -13 10140.7 2117.07   2
  10   2 -13 8473.32 1638.85   1
  -2 -10 -13 10163.5 2298.95   2
 -10  12 -13 13209.2 3270.37   1
  12  -2 -13 10318.4 1658.31   1
  -2 -10 -10 50078.3 4752.58   2
  10   2 -10 47145.3 3622.11   2
  12  -2 -10 40252.0 2229.34   2
 -12  10 -10 47462.0 6053.38   1
  12  -2 -10 42599.1 3437.47   1
  10   2 -10 48716.7 3980.36   1
 -12  10  -7 4086.57 1635.00   1
  10   2  -7 4651.58 1072.36   2
  12  -2  -7 4729.64 673.577   2
 -10  12  -7 6751.63 2207.02   1
  10   2  -7 3710.53 1018.35   1
 -10  12  -4 958.408 725.499   1
 -12  10  -4-60.6139 843.843   1
  10   2  -4 965.885 462.999   2
  12  -2  -4 732.964 307.736   2
 -12  10  -1 8202.38 1979.24   1
  10   2  -1 9623.19 1550.28   2
 -10  12  -1 8525.17 2068.52   1
 -10  12   2 59653.3 3875.85   2
 -12  10   2 60873.9 2274.83   2
  10   2   2 59355.8 3882.85   2
 -10  12   2 55005.8 4741.52   1
 -10  12   5 2107.16 707.451   1
 -10  12   5 3500.64 892.877   2
 -10  12   8 8686.43 1435.29   2
 -10  12   8 8060.83 1073.59   1
 -12  11 -20 4412.05 2248.20   1
   1 -12 -20 4027.53 1589.57   2
  -1 -11 -20 2814.10 1629.00   2
 -11  12 -20 4887.91 2355.45   1
  11   1 -20 3377.72 1100.38   1
 -11  12 -17 8971.27 3044.41   1
  -1 -11 -17 6641.98 2094.89   2
  12  -1 -17 5220.28 1211.70   1
  11   1 -17 6358.71 1466.74   1
 -12  11 -17 7027.09 2799.87   1
   1 -12 -17 6045.79 1932.93   2
  12  -1 -14 1126.31 520.878   1
  11   1 -14 1113.66 482.942   1
   1 -12 -14 2252.07 1056.01   2
  -1 -11 -14 2266.53 1259.41   2
 -12  11 -14 3090.94 2015.32   1
  11   1 -11 17484.9 2137.47   2
 -12  11 -11 23551.4 4465.28   1
  12  -1 -11 18103.7 2368.57   1
  11   1 -11 16545.5 2335.81   1
 -12  11  -8 53924.3 6114.41   1
  11   1  -8 48131.2 3392.86   2
  12  -1  -8 44031.7 2610.33   2
  11   1  -8 47465.2 3966.72   1
 -12  11  -5 24656.3 3937.80   1
  11   1  -5 22470.3 2210.61   2
  12  -1  -5 22695.2 1828.48   2
 -11  12  -5 27987.8 4364.85   1
 -12  11  -2 3100.04 1203.46   1
 -11  12  -2 4537.69 1602.83   1
  11   1  -2 3372.01 797.816   2
  12  -1  -2 2597.61 643.126   2
 -11  12   1 30087.8 2592.43   2
 -12  11   1 28999.1 2111.31   2
  11   1   1 25421.3 2448.65   2
  12  -1   1 30041.5 2497.03   2
 -12  11   1 26798.6 3240.76   1
 -11  12   1 22807.6 3087.44   1
 -11  12   4 13635.2 2098.40   1
 -11  12   4 14100.3 1657.48   2
 -12  11   4 14191.9 1184.15   2
  11   1   4 14742.7 1927.69   2
 -11  12   7 8322.26 1245.53   2
   0 -12 -21 384.855 616.644   2
  12   0 -18 9926.32 1765.30   1
 -12  12 -18 16843.5 4197.68   1
   0 -12 -18 12727.1 2943.66   2
   0 -12 -15 80.6616 281.289   2
  12   0 -15-72.5805 544.960   1
 -12  12 -15 929.681 1195.39   1
 -12  12 -12 133806. 10377.5   1
  12   0 -12 94568.1 5563.54   1
  12   0  -9-718.304 772.003   1
  12   0  -9 152.144 217.175   2
 -12  12  -9 729.794 1086.27   1
 -12  12  -6 48204.4 5576.15   1
  12   0  -6 41357.4 2836.76   2
 -12  12  -3-18.5139 369.686   1
  12   0  -3-78.3580 213.441   2
 -12  12   0 34374.9 3984.67   1
  12   0   0 43283.8 3040.02   2
 -12  12   3-74.4532 114.832   2
 -12  12   3 154.341 323.805   1
  12   0   3 122.296 314.056   2
 -12  12   6 86294.9 3546.98   2
 -13   0 -19-466.576 1196.49   2
 -13   0 -16 11199.6 2957.77   2
   0  13 -16 9755.02 2032.78   1
 -13   0 -13-259.770 680.211   2
   0  13 -13 1036.57 631.027   1
 -13   0 -10 22452.7 3533.29   2
   0  13 -10 19365.6 2635.63   1
 -13   0  -7-236.451 371.638   2
   0  13  -7 52.2759 355.991   1
   0  13  -4 17778.3 2434.31   1
   0  13  -1 19.0877 251.749   1
  13 -13  -1-1282.64 1103.14   1
   0  13   2 9720.09 1766.12   1
   0  13   5-429.961 472.771   1
   0  13   8 8618.37 1647.10   1
   0  13  11-417.509 638.572   1
   0  13  14 12579.3 2185.94   1
   1  12 -20 2608.89 999.079   1
 -12  -1 -20 2830.26 1485.22   2
 -13   1 -20 625.592 1348.18   2
  -1  13 -17 8045.04 1750.15   1
 -12  -1 -17 10281.5 2864.02   2
 -13   1 -17 6715.91 2263.64   2
   1  12 -17 9171.67 1865.57   1
 -12  -1 -14 20366.0 3866.88   2
 -13   1 -14 20523.5 3743.10   2
   1  12 -14 19619.1 2727.87   1
  -1  13 -14 18234.7 2571.90   1
   1  12 -11 10635.2 1939.47   1
 -13   1 -11 13507.9 2761.75   2
  -1  13 -11 10239.9 1841.75   1
 -12  -1 -11 11472.4 2600.12   2
   1  12  -8 9118.15 1733.17   1
 -12  -1  -8 10414.8 2323.12   2
 -13   1  -8 12162.2 2339.82   2
  -1  13  -8 8020.02 1620.58   1
  12 -13  -5 6287.53 1313.61   1
 -13   1  -5 7672.23 1708.84   2
   1  12  -5 7719.02 1612.81   1
  -1  13  -5 5337.05 1282.28   1
  13 -12  -5 4690.80 1222.34   1
 -12  -1  -5 6842.53 1598.30   2
   1  12  -2 58637.7 4436.37   1
  -1  13  -2 56507.6 4174.21   1
  12 -13  -2 41367.1 4020.92   1
  13 -12  -2 35372.5 3877.50   1
   1  12   1 2818.03 941.433   1
  -1  13   1 4720.54 1205.18   1
   1  12   4 5231.59 1292.59   1
  -1  13   4 5964.44 1276.73   1
   1  12   7 9199.83 1783.63   1
  -1  13   7 9341.77 1680.90   1
   1  12  10 21928.7 2864.03   1
  -1  13  10 22563.2 2668.73   1
   1  12  13 9656.13 1921.86   1
  -1  13  13 12305.5 1970.89   1
  -1  13  16 8297.95 1640.05   1
   1  12  16 6878.71 1638.15   1
   2  11 -21 2289.78 939.328   1
 -13   2 -21 1394.24 429.662   2
 -11  -2 -18 18481.8 3877.25   2
   2  11 -18 18620.0 2702.38   1
 -13   2 -18 10196.9 2921.02   2
  -2  13 -18 15523.9 2496.95   1
 -11  -2 -15 23490.8 4156.36   2
   2  11 -15 21469.5 2759.78   1
 -13   2 -15 16420.1 3367.03   2
  -2  13 -15 17922.2 2574.32   1
 -11  -2 -12 55942.0 5907.60   2
   2  11 -12 49167.6 4088.90   1
 -13   2 -12 47420.6 5251.16   2
  -2  13 -12 45356.3 3998.98   1
 -11  -2  -9 47946.7 4958.78   2
 -13   2  -9 46995.4 4592.57   2
  -2  13  -9 45066.3 3796.20   1
   2  11  -9 38558.5 3618.40   1
   2  11  -6 62993.0 4603.39   1
 -11  -2  -6 65987.5 5215.72   2
 -13   2  -6 71862.3 5117.73   2
  -2  13  -6 58598.5 4214.43   1
  11 -13  -6 71350.5 3918.10   1
   2  11  -3 40284.7 3695.06   1
  11 -13  -3 43969.8 3818.32   1
 -13   2  -3 43758.7 3439.32   2
  -2  13  -3 40638.0 3410.39   1
  13 -11  -3 38894.9 3919.07   1
  -2  13   0 95632.7 5199.44   1
   2  11   0 94102.2 5628.60   1
  -2  13   3 31995.9 2986.63   1
   2  11   3 30975.4 3279.56   1
  -2  13   6 23775.1 2550.01   1
   2  11   6 22928.1 2870.77   1
   2  11   9 11895.0 2070.52   1
  -2  13   9 13032.0 1942.01   1
  -2  13  12 88435.3 5088.67   1
  -2  13  15 9237.14 1635.54   1
   3  10 -22 11247.7 2090.89   1
 -13   3 -22 6358.67 2112.13   2
  -3  13 -19 4104.10 1509.76   1
 -10  -3 -19 3586.18 1492.08   2
 -13   3 -19 1714.15 1093.94   2
   3  10 -19 3632.71 1204.62   1
  -3  13 -16 2667.08 927.417   1
 -10  -3 -16 3447.16 1743.50   2
 -13   3 -16 3419.95 1624.61   2
   3  10 -16 3543.40 1141.72   1
   3  10 -13 10511.6 1949.32   1
 -10  -3 -13 12694.4 2910.31   2
  -3  13 -13 9128.89 1815.21   1
 -13   3 -13 9140.49 2252.55   2
   3  10 -10 36778.8 3541.72   1
 -10  -3 -10 44418.9 4915.37   2
 -13   3 -10 40227.5 4411.40   2
  -3  13 -10 35764.0 3385.85   1
  13 -10  -7 5695.52 1141.23   1
   3  10  -7 9304.58 1752.35   1
 -13   3  -7 9748.98 1886.26   2
 -10  -3  -7 8980.92 2065.87   2
  -3  13  -7 9602.61 1774.10   1
 -13   3  -4 8137.75 1511.63   2
   3  10  -4 7769.57 1621.62   1
  -3  13  -4 8113.99 1533.95   1
  13 -10  -4 10567.6 2106.56   1
  10 -13  -4 8527.89 1639.19   1
  10 -13  -1 9290.99 1927.61   1
   3  10  -1 8784.65 1689.52   1
  -3  13  -1 9909.50 1618.03   1
  13 -10  -1 14407.8 2639.34   1
  -3  13   2 51018.9 3647.32   1
   3  10   2 51426.6 4229.66   1
  -3  13   5 19602.0 2236.71   1
   3  10   5 20074.9 2698.28   1
  -3  13   8 8918.62 1496.03   1
  -3  13  11 18119.4 2100.10   1
  -3  13  14 31808.1 2792.42   1
   4   9 -23 4148.30 1277.40   1
  -9  -4 -20 1977.68 1213.76   2
  -4  13 -20-107.195 765.469   1
 -13   4 -20-820.679 1335.50   2
   4   9 -20 798.075 638.638   1
  -4  13 -17 6112.19 1755.70   1
  -9  -4 -17 5305.76 2152.83   2
 -13   4 -17 3287.26 1399.25   2
   4   9 -17 6337.20 1554.75   1
   4   9 -14 23491.9 2816.71   1
  -9  -4 -14 26959.3 4312.86   2
 -13   4 -14 17350.2 3361.05   2
  -4  13 -14 16567.8 2556.04   1
  -4  13 -11 1770.17 591.067   1
  -9  -4 -11 3276.17 1402.43   2
   4   9 -11 3682.12 1207.01   1
 -13   4 -11 3268.36 1377.45   2
   4   9  -8 3396.40 1063.98   1
  -9  -4  -8 2335.85 1001.82   2
  13  -9  -8 2200.18 729.571   1
 -13   4  -8 2382.92 870.210   2
  -4  13  -8 1846.19 681.008   1
 -13   4  -5 24398.7 2622.93   2
  -4  13  -5 22156.4 2562.83   1
   9 -13  -5 25133.4 2465.21   1
  13  -9  -5 25688.4 3255.36   1
   4   9  -5 22033.7 2676.44   1
  13  -9  -2 32913.7 3912.25   1
 -13   4  -2 31597.3 2438.91   2
  -4  13  -2 28279.1 2751.38   1
   4   9  -2 29054.3 3121.58   1
   9 -13  -2 33320.9 3420.36   1
  13  -9   1 58739.1 5446.33   1
   9 -13   1 46090.6 4557.55   1
  -4  13   1 48794.7 3480.43   1
   4   9   1 47219.7 4076.53   1
  -4  13   4 11325.1 1630.74   1
   4   9   4 10259.1 1872.32   1
  -4  13   7 26011.8 2463.30   1
  -4  13  10 40595.5 3006.95   1
  -4  13  13 7094.78 1221.59   1
   5   8 -24 17726.8 2747.02   1
   8 -13 -21 11041.5 2233.35   2
  -8  -5 -21 10610.0 3015.82   2
   5   8 -21 10861.2 2115.09   1
 -13   5 -21 6589.78 2442.71   2
  -5  13 -21 9651.41 2492.36   1
  -8  -5 -18 18868.6 4003.99   2
   5   8 -18 16520.4 2519.91   1
 -13   5 -18 9821.04 2738.10   2
  -5  13 -18 14274.6 2862.82   1
   5   8 -15 16118.1 2342.41   1
  -8  -5 -15 19802.1 3774.07   2
 -13   5 -15 10930.8 2795.62   2
  -5  13 -15 16040.1 2748.75   1
   5   8 -12 90132.4 5549.71   1
 -13   5 -12 74358.8 6570.44   2
  -5  13 -12 76226.6 5434.23   1
   5   8  -9 34297.7 3359.19   1
  13  -8  -9 33966.4 3165.73   1
  -8  -5  -9 39906.3 4459.15   2
 -13   5  -9 32547.2 3762.42   2
  -5  13  -9 28305.1 3031.44   1
  13  -8  -6 16783.2 2390.51   1
  -8  -5  -6 16166.1 2597.74   2
 -13   5  -6 16319.9 2239.73   2
  -5  13  -6 15171.7 2146.15   1
   5   8  -6 15304.5 2270.41   1
  13  -8  -3 43269.0 4088.67   1
 -13   5  -3 40204.6 2888.23   2
  -5  13  -3 38509.1 3231.48   1
   8 -13  -3 44139.6 3694.75   1
   5   8  -3 39200.8 3641.78   1
  13  -8   0 151785. 7969.08   1
  -5  13   0 136333. 5872.45   1
   5   8   0 137144. 6941.09   1
   8 -13   0 145243. 7647.88   1
  -5  13   3 11973.2 1645.25   1
  -5  13   6 41340.0 2941.13   1
  -5  13   9 15367.3 1729.51   1
  -5  13  12 44536.6 2825.22   1
   6   7 -25 131.731 499.740   1
   7 -13 -22 18074.6 3057.41   2
   6   7 -22 15698.6 2508.00   1
 -13   6 -22 15170.3 4079.74   2
   7 -13 -19 971.069 745.947   2
  -7  -6 -19 3147.84 1824.09   2
 -13   6 -19 430.877 663.405   2
   6   7 -19 743.481 640.014   1
  -6  13 -19 1178.90 773.158   1
   6   7 -16 15859.1 2317.92   1
  -7  -6 -16 19124.7 3798.16   2
 -13   6 -16 10176.6 2734.03   2
  -6  13 -16 13383.1 2764.91   1
  -7  -6 -13 5529.92 1979.56   2
   6   7 -13 4436.56 1209.24   1
  -6  13 -13 3908.13 1440.95   1
 -13   6 -13 3109.89 1216.77   2
   6   7 -10 22531.6 2795.69   1
  -7  -6 -10 26858.0 3775.06   2
 -13   6 -10 21188.9 3193.40   2
  13  -7 -10 25930.6 2529.82   1
  -6  13 -10 21315.7 2861.45   1
  -7  -6  -7 12235.2 2338.80   2
  -6  13  -7 7531.08 1514.07   1
 -13   6  -7 9793.44 1855.94   2
  13  -7  -7 9708.81 1661.83   1
   6   7  -7 10468.9 1891.10   1
   6   7  -4 8524.65 1658.32   1
  -6  13  -4 7172.02 1378.15   1
 -13   6  -4 9478.52 1434.74   2
  13  -7  -4 10520.6 1812.15   1
 -13   6  -1 20640.3 1500.06   2
  13  -7  -1 22895.8 2893.96   1
  -6  13  -1 20491.3 2295.61   1
   6   7  -1 19599.5 2565.35   1
   7 -13  -1 21826.2 2824.36   1
  -6  13   2 62139.2 3859.79   1
  -6  13   5 26635.7 2398.67   1
  -6  13   8 10493.6 1429.47   1
  -6  13  11 11767.4 1395.78   1
   7   6 -23 46.2744 357.119   1
   6 -13 -23 759.726 904.856   2
  -7  13 -20 1591.08 1507.10   1
   6 -13 -20 1434.57 885.475   2
  -6  -7 -20 2755.29 1754.20   2
 -13   7 -20 3986.11 2023.43   2
   7   6 -20 2424.47 975.367   1
   6 -13 -17 2382.01 1035.49   2
  -6  -7 -17 3075.97 1570.23   2
   7   6 -17 2214.45 942.163   1
 -13   7 -17 2115.56 1506.45   2
  -7  13 -17 1357.65 978.392   1
  -7  13 -14 22308.9 3736.51   1
   7   6 -14 27908.6 3089.07   1
  -6  -7 -14 32391.8 4598.26   2
 -13   7 -14 16164.9 3398.46   2
   7   6 -11 11189.2 1911.50   1
  13  -6 -11 14929.2 1823.87   1
  -6  -7 -11 15845.0 2943.97   2
  -7  13 -11 10392.6 2278.09   1
 -13   7 -11 7981.60 2072.71   2
  13  -6 -11 12791.1 1533.38   1
  13  -6  -8 10110.1 1579.43   1
   7   6  -8 6814.52 1443.58   1
  -7  13  -8 7883.93 1864.63   1
 -13   7  -8 7830.78 1745.80   2
  -6  -7  -8 8180.94 1923.96   2
  13  -6  -5 27839.7 2753.83   1
 -13   7  -5 23125.0 2555.78   2
  -7  13  -5 22120.0 2787.05   1
   7   6  -5 22881.8 2848.58   1
  13  -6  -2 64654.2 4440.45   1
 -13   7  -2 62077.2 3011.41   2
  -7  13  -2 58008.4 4166.68   1
   7   6  -2 58362.5 4506.40   1
  -7  13   1 23518.0 2945.32   2
  -7  13   1 21681.0 2383.53   1
  -7  13   4 6341.91 1153.99   1
  -7  13   4 9212.61 1777.05   2
  -7  13   7 11625.8 1524.78   1
  -7  13  10 21936.8 1898.13   1
   5 -13 -24 29910.0 4505.77   2
   8   5 -24 24155.3 3134.78   1
   5 -13 -21 10930.8 2440.26   2
  -8  13 -21 12187.3 3092.51   1
  -5  -8 -21 11587.0 3362.08   2
   8   5 -21 9766.43 1987.33   1
 -13   8 -21 17372.5 4762.75   2
   5 -13 -18 32995.6 4020.10   2
  -8  13 -18 39251.4 5446.30   1
  -5  -8 -18 43173.1 5872.97   2
   8   5 -18 30971.1 3299.12   1
 -13   8 -18 37387.2 6126.45   2
  -8  13 -15 20058.5 3764.01   1
   8   5 -15 19524.1 2610.22   1
  -5  -8 -15 23942.1 4054.68   2
   8   5 -12 44088.4 3940.07   1
  -8  13 -12 41128.4 5064.32   1
  -5  -8 -12 48222.5 5276.82   2
  -8  13  -9 13196.7 2690.48   1
  -5  -8  -9 17551.9 2914.01   2
 -13   8  -9 11281.2 2425.41   2
  13  -5  -9 19497.8 2221.37   1
   8   5  -9 14280.5 2198.50   1
 -13   8  -6 36530.4 3584.55   2
  13  -5  -6 47760.0 3565.08   1
   8   5  -6 40696.4 3825.34   1
  -8  13  -6 42101.7 4505.06   1
  13  -5  -3 11395.5 1798.61   1
 -13   8  -3 9563.87 1389.54   2
  -8  13  -3 11278.7 2153.14   1
  -8  13   0 139393. 6961.37   2
  -8  13   0 130822. 6711.31   1
  -8  13   3 38529.7 3597.71   2
  -8  13   3 33484.7 3179.30   1
  -8  13   6 15301.8 2225.01   2
  -8  13   6 12836.3 1893.89   1
  -8  13   9 29917.0 3087.03   2
  -8  13   9 22432.6 2306.40   1
   4 -13 -22 25848.7 4117.68   2
   9   4 -22 23447.6 2996.56   1
   4 -13 -19 4985.14 1697.85   2
  -4  -9 -19 5453.50 2190.30   2
  -9  13 -19 6061.70 2443.60   1
   9   4 -19 5536.25 1422.40   1
 -13   9 -19 3919.44 1259.31   1
  -4  -9 -16 4140.19 1802.26   2
   9   4 -16 2585.98 902.756   1
 -13   9 -16 1347.34 575.700   1
  -9  13 -16 3889.95 1800.17   1
   4 -13 -16 2434.06 1118.60   2
  13  -4 -13 6056.39 1145.12   1
  -9  13 -13 7687.25 2463.72   1
   9   4 -13 6060.85 1406.55   1
  -4  -9 -13 6700.82 1995.40   2
 -13   9 -13 1369.92 836.035   1
 -13   9 -10 29063.5 4557.94   1
  -9  13 -10 43688.7 5279.59   1
  -4  -9 -10 46223.5 4714.19   2
   9   4 -10 41138.5 3778.84   1
  -9  13  -7 24307.0 3733.86   1
   9   4  -7 23451.3 2901.93   1
 -13   9  -7 16544.6 3102.47   1
  -9  13  -4 12104.6 2542.83   1
   9   4  -4 9837.40 1743.58   2
  13  -4  -4 11110.1 1872.36   1
  -9  13  -1 41690.2 4549.05   1
 -13   9  -1 44416.2 2432.57   2
  -9  13   2 28155.4 3442.82   1
  -9  13   2 31431.6 3131.45   2
  -9  13   5 20351.8 2692.31   1
  -9  13   5 25147.5 2719.93   2
  -9  13   8 1235.80 441.494   1
  -9  13   8 2767.21 867.781   2
  -9  13  11 3222.48 1016.20   2
   3 -13 -23-32.3319 1055.94   2
 -10  13 -20 2934.67 1799.09   1
 -13  10 -20-1141.82 2064.24   1
   3 -13 -20 622.750 508.357   2
  -3 -10 -20 1081.96 1266.66   2
  10   3 -20-230.813 553.284   1
   3 -13 -17 3847.80 1502.20   2
  -3 -10 -17 4697.66 1858.42   2
  10   3 -17 4105.41 1195.49   1
 -10  13 -17 4636.57 2214.90   1
 -13  10 -17 3003.39 1459.36   1
  10   3 -14 29094.0 3177.31   1
  -3 -10 -14 35189.3 4674.49   2
 -10  13 -14 38103.0 5453.57   1
 -13  10 -14 33604.1 5483.42   1
  13  -3 -14 31134.4 2882.52   1
  -3 -10 -11 19717.0 3215.63   2
 -10  13 -11 22448.5 4035.83   1
 -13  10 -11 15581.4 3443.47   1
  13  -3 -11 18002.2 2265.33   1
  10   3 -11 18700.7 2556.88   1
  10   3  -8 13156.5 2000.28   2
  13  -3  -8 10075.1 720.641   2
  10   3  -8 12052.5 2068.10   1
 -13  10  -8 7788.96 2106.65   1
 -10  13  -5 25191.8 3867.34   1
  10   3  -5 22092.3 2555.83   2
 -10  13  -2 55792.8 5471.80   1
  10   3  -2 54089.0 3939.55   2
 -10  13   1 9850.40 1693.93   2
 -13  10   1 8594.64 728.885   2
 -10  13   1 9508.74 2075.53   1
 -13  10   1 7834.52 759.623   2
 -10  13   4 7798.87 1774.62   1
 -10  13   7 7035.47 1268.72   1
 -10  13  10 40409.8 3355.58   2
   2 -13 -21 6115.38 2049.98   2
  11   2 -18 11297.5 2029.52   1
 -11  13 -18 17666.1 3968.74   1
   2 -13 -18 12832.0 2763.68   2
  -2 -11 -18 11871.8 3031.06   2
 -13  11 -18 14167.8 3767.15   1
 -11  13 -15 8732.15 2844.04   1
 -13  11 -15 6740.97 2611.83   1
  -2 -11 -15 7921.09 2273.42   2
  11   2 -15 5448.85 1386.41   1
  13  -2 -15 7442.40 1453.23   1
 -13  11 -12 105702. 9612.37   1
 -11  13 -12 117033. 9632.51   1
  13  -2 -12 87153.6 5173.08   1
  11   2 -12 83065.6 5450.05   1
 -13  11  -9 13002.4 3150.94   1
 -11  13  -9 18018.7 3705.62   1
  11   2  -9 12478.7 1890.88   2
  11   2  -9 11997.9 2089.85   1
  11   2  -6 27568.9 2732.58   2
  13  -2  -6 25376.9 1708.27   2
 -13  11  -6 22858.2 3843.74   1
  11   2  -3 30723.6 2841.60   2
 -11  13  -3 40425.4 4901.80   1
  13  -2  -3 35189.6 2252.49   2
 -13  11  -3 25905.3 3767.50   1
 -13  11   0 87891.8 6243.73   1
  11   2   0 90684.6 4875.13   2
 -11  13   0 101837. 7123.66   1
 -11  13   3 38678.2 3818.14   1
 -11  13   6 67157.9 4152.95   1
 -11  13   6 71508.4 4122.99   2
 -13  12 -19 17178.0 4080.29   1
   1 -13 -19 11563.7 2828.35   2
  -1 -12 -19 10728.3 2875.35   2
 -12  13 -19 13657.8 3784.98   1
  13  -1 -16 10123.1 1818.14   1
  12   1 -16 10891.4 1966.56   1
   1 -13 -16 10431.4 2484.51   2
  -1 -12 -16 9694.53 2542.16   2
 -12  13 -16 15742.5 3813.37   1
 -13  12 -16 15478.6 4019.27   1
 -12  13 -13 15905.2 3863.72   1
 -13  12 -13 20550.1 4363.29   1
  13  -1 -13 11787.6 1968.19   1
  12   1 -13 11353.5 2029.27   1
 -13  12 -10 26599.2 4610.79   1
  13  -1 -10 19790.5 2595.28   1
  12   1 -10 20623.5 2785.96   1
 -12  13  -7 11688.8 3146.63   1
  12   1  -7 8294.04 1431.04   2
 -13  12  -7 9935.96 2682.30   1
 -13  12  -4 7033.12 2013.62   1
  12   1  -4 9500.75 1495.77   2
  13  -1  -4 7611.33 1105.26   2
 -12  13  -4 11645.2 2831.07   1
 -12  13  -1 1758.50 1035.60   1
 -13  12  -1 2027.54 941.497   1
  12   1  -1 2796.08 824.830   2
  13  -1  -1 4662.02 926.037   2
 -13  12   2 48032.6 4302.76   1
 -12  13   2 47797.5 4451.56   1
 -12  13   2 53967.0 3541.81   2
 -13  12   2 50924.0 2711.69   2
  12   1   2 53543.9 3713.72   2
 -12  13   5 6877.84 1180.42   2
 -12  13   5 7255.10 1471.04   1
   0 -13 -17 555.840 952.284   2
  13   0 -17 81.5381 254.812   1
 -13  13 -17 471.137 1278.63   1
 -13  13 -14 17693.8 3949.04   1
  13   0 -14 13051.4 2122.55   1
  13   0 -11-28.8917 238.806   1
 -13  13 -11 756.846 1261.45   1
 -13  13  -8 12923.3 3202.47   1
 -13  13  -5-347.941 664.002   1
  13   0  -2 8956.53 1398.34   2
 -13  13  -2 6539.74 1792.40   1
 -13  13   1-55.7633 213.863   1
  13   0   1 100.941 288.573   2
 -14   0 -17-433.168 1189.54   2
 -14   0 -14 6041.15 2216.31   2
   0  14 -14 6082.88 1604.39   1
 -14   0 -11-88.0047 348.645   2
   0  14 -11-6.39142 326.001   1
 -14   0  -8 24996.0 3569.74   2
   0  14  -8 22688.3 2868.59   1
   0  14  -5 41.1454 441.583   1
   0  14  -2 13132.2 2200.50   1
   0  14   1-176.261 516.122   1
   0  14   4 43086.0 3970.02   1
   0  14   7 49.5955 361.219   1
   0  14  10 5290.48 1398.93   1
   0  14  13-416.440 789.255   1
 -13  -1 -18 28328.2 5152.47   2
 -14   1 -18 23120.9 4566.73   2
  -1  14 -15 4442.34 1352.42   1
 -13  -1 -15 5916.81 2146.53   2
 -14   1 -15 3583.18 1596.08   2
   1  13 -15 5746.10 1565.05   1
 -13  -1 -12 44846.0 5501.59   2
 -14   1 -12 39187.2 5055.38   2
   1  13 -12 36456.2 3750.79   1
  -1  14 -12 38713.4 3776.67   1
 -13  -1  -9 15113.3 2915.45   2
 -14   1  -9 17879.3 3035.14   2
   1  13  -9 12507.5 2132.89   1
  -1  14  -9 13229.9 2196.81   1
   1  13  -6 25820.0 3062.82   1
 -13  -1  -6 27363.9 3458.41   2
 -14   1  -6 26888.5 3370.47   2
  -1  14  -6 25094.4 2885.47   1
   1  13  -3 14756.4 2308.54   1
  -1  14  -3 17055.7 2406.17   1
   1  13   0 68475.3 5063.88   1
  -1  14   0 66982.6 4746.10   1
   1  13   3 6644.26 1559.23   1
  -1  14   3 4915.29 1274.56   1
  -1  14   6 49332.0 4091.04   1
   1  13   6 44933.8 4116.43   1
   1  13   9 2570.44 941.545   1
  -1  14   9 1637.70 780.696   1
   1  13  12 31534.1 3605.31   1
  -1  14  12 32753.6 3399.17   1
   1  13  15 1767.96 750.895   1
  -1  14  15 2366.45 787.995   1
 -12  -2 -19 5183.73 2211.30   2
 -14   2 -19 1934.34 807.318   2
  -2  14 -16 6418.13 1550.54   1
 -12  -2 -16 9099.81 2864.04   2
 -14   2 -16 7433.77 2416.27   2
   2  12 -16 8493.03 1821.22   1
  -2  14 -13 8567.82 1776.31   1
   2  12 -13 9705.80 1972.75   1
 -12  -2 -13 9253.76 2581.35   2
 -14   2 -13 8860.94 2333.09   2
 -12  -2 -10 20163.4 3455.59   2
   2  12 -10 17777.2 2508.17   1
 -14   2 -10 17198.5 3089.17   2
  -2  14 -10 15134.8 2323.78   1
   2  12  -7 11449.0 2026.62   1
 -12  -2  -7 12293.3 2404.70   2
 -14   2  -7 13777.3 2433.11   2
  -2  14  -7 12282.3 2006.87   1
   2  12  -4 13515.7 2225.03   1
 -14   2  -4 17981.8 2352.70   2
  -2  14  -4 14398.9 2120.63   1
   2  12  -1 23571.3 2908.93   1
  12 -14  -1 16268.8 2726.15   1
  -2  14  -1 24896.1 2779.18   1
  14 -12  -1 28331.2 3724.38   1
  -2  14   2 31578.7 3141.44   1
   2  12   2 31311.8 3442.33   1
  -2  14   5 45903.6 3770.01   1
   2  12   5 46445.5 4196.06   1
   2  12   8 6599.10 1609.97   1
  -2  14   8 7872.08 1527.66   1
  -2  14  11 31174.1 3136.35   1
   2  12  11 28665.3 3425.42   1
   2  12  14 20150.2 2957.52   1
  -2  14  14 21877.5 2632.50   1
   3  11 -20 3743.03 1235.18   1
 -14   3 -20 156.380 1490.52   2
  -3  14 -17 9751.55 2011.59   1
   3  11 -17 12310.5 2214.55   1
 -11  -3 -17 13151.2 3384.17   2
 -14   3 -17 7350.16 2267.23   2
 -11  -3 -14 27383.5 4532.82   2
   3  11 -14 25151.1 3050.55   1
 -14   3 -14 20420.5 3683.02   2
  -3  14 -14 19346.9 2703.82   1
   3  11 -11 10752.1 2015.67   1
 -11  -3 -11 12871.8 2884.85   2
 -14   3 -11 10610.3 2425.94   2
  -3  14 -11 11039.4 1969.94   1
 -11  -3  -8 412.346 856.619   2
   3  11  -8 931.110 776.699   1
 -14   3  -8 163.243 301.193   2
  -3  14  -8 782.988 566.933   1
   3  11  -5 11051.4 1995.20   1
 -14   3  -5 11030.2 1868.15   2
  -3  14  -5 11399.4 1869.17   1
  14 -11  -5 8964.93 1801.02   1
  11 -14  -5 12628.0 1882.08   1
  11 -14  -2 23530.7 3075.38   1
  -3  14  -2 20816.1 2468.85   1
   3  11  -2 22733.5 2876.20   1
  -3  14   1 16030.8 2145.18   1
   3  11   1 13109.1 2184.97   1
   3  11   4 9777.46 1902.90   1
  -3  14   4 10955.9 1759.14   1
  -3  14   7 14723.4 2030.31   1
   3  11   7 12396.7 2213.81   1
  -3  14  10 20357.6 2358.57   1
  -3  14  13 11292.6 1745.89   1
   4  10 -21 576.971 400.952   1
 -14   4 -21-1696.43 2100.97   2
 -10  -4 -18 28997.8 5147.08   2
   4  10 -18 25052.4 3170.85   1
 -14   4 -18 16815.5 3729.76   2
  -4  14 -18 23504.2 3350.12   1
  -4  14 -15-949.635 853.578   1
 -10  -4 -15 1306.86 1134.31   2
 -14   4 -15-389.996 586.837   2
   4  10 -15 493.029 487.388   1
   4  10 -12 59770.7 4664.91   1
 -14   4 -12 49951.1 5346.90   2
  -4  14 -12 50864.2 4268.16   1
  -4  14  -9 1068.89 556.449   1
 -10  -4  -9 2232.64 1119.52   2
   4  10  -9 1108.86 399.934   1
 -14   4  -9 2063.45 945.999   2
   4  10  -6 23765.7 2969.73   1
 -14   4  -6 27386.1 3063.63   2
  -4  14  -6 24634.9 2767.21   1
  14 -10  -6 29996.7 3303.79   1
  10 -14  -3 4436.74 1277.96   1
   4  10  -3 4625.12 1262.96   1
 -14   4  -3 3413.16 867.542   2
  14 -10  -3 5324.01 1527.51   1
  -4  14  -3 4330.51 1133.07   1
  -4  14   0 108986. 5504.87   1
   4  10   0 114268. 6623.04   1
   4  10   3 396.647 398.523   1
  -4  14   3 1377.93 649.281   1
  -4  14   6 28875.1 2741.57   1
   4  10   6 25093.8 3151.85   1
  -4  14   9 5108.11 1143.54   1
  -4  14  12 46358.9 3343.62   1
   5   9 -22 8546.39 1876.69   1
 -14   5 -22 5215.95 2106.00   2
   5   9 -19 9951.40 2093.72   1
  -9  -5 -19 10854.0 3119.38   2
  -5  14 -19 8220.38 2238.43   1
 -14   5 -19 3499.44 1664.79   2
  -9  -5 -16 17974.6 3850.34   2
   5   9 -16 15003.3 2380.18   1
 -14   5 -16 10299.6 2790.64   2
  -5  14 -16 13115.8 2516.06   1
   5   9 -13 23178.9 2910.28   1
  -9  -5 -13 23471.5 3947.10   2
 -14   5 -13 18816.7 3379.56   2
  -5  14 -13 19224.0 2761.39   1
  -5  14 -10 3643.86 1065.14   1
  -9  -5 -10 5580.99 1868.11   2
   5   9 -10 5037.03 1451.28   1
 -14   5 -10 6080.14 1686.94   2
   5   9  -7 14679.8 2289.79   1
  -9  -5  -7 16151.5 2793.44   2
 -14   5  -7 14242.0 2326.22   2
  -5  14  -7 11547.8 1945.54   1
  14  -9  -7 14001.1 2281.10   1
  14  -9  -4 25429.5 3321.97   1
 -14   5  -4 26647.1 2599.63   2
  -5  14  -4 22819.1 2628.38   1
   9 -14  -4 26422.3 2852.49   1
   5   9  -4 23056.2 2878.81   1
   5   9  -1 9297.95 1887.29   1
  -5  14  -1 11074.8 1763.83   1
  14  -9  -1 10181.0 2193.59   1
   9 -14  -1 9901.87 1968.67   1
  -5  14   2 32591.9 2906.86   1
   5   9   2 32278.2 3515.41   1
  -5  14   5 12187.1 1748.37   1
  -5  14   8 6783.39 1296.55   1
  -5  14  11 7397.35 1263.50   1
   6   8 -23 4120.60 1327.30   1
  -8  -6 -20 9125.21 3026.76   2
 -14   6 -20 2775.30 1567.29   2
   6   8 -20 5786.88 1547.05   1
  -6  14 -20 4262.75 1755.21   1
  -8  -6 -17 4495.43 2003.59   2
   6   8 -17 3881.73 1266.18   1
  -6  14 -17 1974.28 1016.22   1
 -14   6 -17 867.625 747.702   2
   6   8 -14 23064.4 2957.98   1
 -14   6 -14 16194.8 3315.87   2
  -6  14 -14 16376.9 2881.44   1
  -6  14 -11 3530.04 1192.67   1
  -8  -6 -11 6076.63 1888.38   2
   6   8 -11 5537.58 1475.80   1
 -14   6 -11 4256.46 1559.47   2
  -6  14  -8 2400.29 709.400   1
  14  -8  -8 4303.37 1180.26   1
   6   8  -8 2732.45 894.519   1
  -8  -6  -8 5097.32 1632.25   2
 -14   6  -8 4149.75 1314.69   2
  14  -8  -5 14550.3 2280.86   1
 -14   6  -5 12394.4 1828.98   2
  -6  14  -5 10309.6 1738.74   1
   6   8  -5 10827.4 2004.39   1
  -6  14  -2 8182.34 1503.87   1
   6   8  -2 9651.70 1916.33   1
 -14   6  -2 10510.4 1259.20   2
  14  -8  -2 10381.8 2041.30   1
   8 -14  -2 12030.9 2131.93   1
  -6  14   1 26242.1 2607.62   1
   6   8   1 25613.1 3146.32   1
  -6  14   4 45658.8 3313.66   1
  -6  14   7 22829.0 2295.03   1
  -6  14  10 11116.2 1485.59   1
   7   7 -24 5896.29 1574.05   1
   7 -14 -21 6272.27 1846.37   2
 -14   7 -21 5157.91 2328.85   2
   7   7 -21 6087.60 1594.33   1
  -7  14 -18 37660.8 5201.99   1
   7   7 -18 43480.3 4050.65   1
 -14   7 -18 31136.0 5218.65   2
   7   7 -15 13272.7 2209.51   1
  -7  -7 -15 14723.9 3423.83   2
  -7  14 -15 10440.7 2545.22   1
 -14   7 -15 4735.44 1726.03   2
   7   7 -12 42699.9 3986.86   1
  -7  -7 -12 49324.3 5581.78   2
  -7  14 -12 38124.0 4401.86   1
   7   7  -9 5925.28 1442.00   1
  -7  -7  -9 7598.63 2014.92   2
  -7  14  -9 4542.46 1395.46   1
 -14   7  -9 4888.85 1482.74   2
 -14   7  -6 45718.8 3771.51   2
  14  -7  -6 53780.0 4027.33   1
  -7  14  -6 41856.2 3880.02   1
   7   7  -6 44452.7 4037.72   1
  14  -7  -3 1148.58 350.454   1
   7   7  -3 162.053 336.010   1
 -14   7  -3 687.641 350.473   2
  -7  14   0 95841.1 5210.76   1
  -7  14   3 117.099 380.200   1
  -7  14   6 43815.1 3165.72   1
  -7  14   9 5034.62 1009.95   1
   6 -14 -22 20828.7 3458.27   2
   8   6 -22 18768.1 2771.80   1
 -14   8 -22 20188.2 4726.43   2
  -8  14 -19 7388.91 2475.14   1
  -6  -8 -19 10096.7 3019.89   2
   8   6 -19 6102.94 1626.74   1
 -14   8 -19 9009.13 2982.15   2
  -8  14 -16 21384.1 3850.11   1
   8   6 -16 18384.0 2611.78   1
  -6  -8 -16 21355.9 4081.83   2
 -14   8 -16 15025.2 3685.98   2
  -6  -8 -13 9963.98 2518.67   2
   8   6 -13 9214.37 1848.88   1
 -14   8 -13 5423.52 1843.26   2
  -8  14 -13 4978.44 1667.22   1
  -6  -8 -10 12158.7 2533.55   2
   8   6 -10 10135.8 1938.23   1
  -8  14 -10 10082.2 2350.65   1
 -14   8 -10 7946.37 1981.66   2
  14  -6  -7 28138.1 2830.15   1
 -14   8  -7 21629.1 2837.79   2
  -8  14  -7 21430.6 3135.91   1
   8   6  -7 22209.5 2884.18   1
  14  -6  -4 49648.1 3894.72   1
 -14   8  -4 44194.0 3171.77   2
   8   6  -4 42122.1 4050.70   1
  -8  14  -4 36245.7 3748.42   1
 -14   8  -1 27284.3 1430.12   2
  -8  14  -1 27534.7 3119.66   1
  -8  14   2 9001.05 1629.89   1
  -8  14   5 13375.3 1888.33   1
  -8  14   8 3193.94 892.465   1
   5 -14 -23 4125.74 1670.09   2
   9   5 -23 3798.36 1159.77   1
   5 -14 -20 5704.91 1732.32   2
   9   5 -20 4779.65 1337.76   1
  -9  14 -17 2407.96 1721.55   1
  -5  -9 -17 503.217 1046.24   2
   9   5 -17 3225.28 1148.88   1
 -14   9 -17 3608.22 2346.81   2
   9   5 -14 25296.8 3055.81   1
  -9  14 -14 31022.6 4750.72   1
  -5  -9 -14 30574.6 4554.93   2
  14  -5 -11 5780.27 1197.05   1
   9   5 -11 5110.34 1386.58   1
  -5  -9 -11 5893.62 1806.86   2
  -9  14 -11 5189.47 1881.48   1
   9   5  -8 4264.00 1250.37   1
  14  -5  -8 4830.65 1240.51   1
 -14   9  -8 2281.07 944.625   2
  -9  14  -8 3599.41 1437.24   1
 -14   9  -5 8532.25 1583.75   2
  -9  14  -5 8761.05 2103.79   1
   9   5  -5 10122.1 1967.38   1
 -14   9  -2 32308.2 2152.17   2
  -9  14  -2 34443.4 4088.56   1
  -9  14   1 10163.6 1968.28   2
  -9  14   1 8386.41 1860.35   1
  -9  14   4 18019.7 2617.26   1
  -9  14   4 21547.2 2770.59   2
  -9  14   7 11528.3 1893.30   1
  -9  14   7 17562.0 2491.90   2
   4 -14 -21 2379.94 1467.54   2
  10   4 -21 2103.80 1003.58   1
 -14  10 -18 34611.8 6166.40   1
  10   4 -18 26244.7 3131.10   1
  -4 -10 -18 33391.0 5235.84   2
 -10  14 -18 38541.8 5751.34   1
  -4 -10 -15 7360.05 2247.10   2
  10   4 -15 6461.76 1593.37   1
 -10  14 -15 9473.74 2721.32   1
 -14  10 -15 2540.02 635.122   1
 -10  14 -12 57419.5 6403.02   1
  -4 -10 -12 54530.7 5601.56   2
  14  -4 -12 52093.5 3826.52   1
  10   4 -12 43749.7 4068.21   1
  10   4  -9 3692.91 1221.47   1
 -10  14  -9 5640.17 2002.54   1
 -10  14  -6 31871.1 4438.05   1
  10   4  -6 27681.2 3295.80   1
 -10  14  -3 1428.08 986.066   1
 -14  10  -3 1371.95 619.301   2
 -10  14   0 121734. 7890.15   1
 -10  14   0 110374. 6314.27   2
 -10  14   3 4351.36 1389.35   1
 -10  14   3 5239.24 1304.15   2
 -10  14   6 24450.7 2912.81   1
 -10  14   6 30550.5 3172.16   2
   3 -14 -19 9003.64 2401.47   2
  11   3 -19 8426.32 1762.77   1
 -14  11 -16 15565.6 3820.60   1
  11   3 -16 12168.2 2152.07   1
  -3 -11 -16 12869.9 3221.37   2
 -11  14 -16 18657.4 4074.04   1
  -3 -11 -13 13848.3 2918.08   2
  11   3 -13 9429.04 1862.65   1
 -11  14 -13 20322.2 4114.03   1
  14  -3 -13 13072.2 1939.54   1
 -14  11 -13 13253.2 3328.16   1
 -14  11 -10 14965.4 3320.49   1
 -11  14 -10 21855.7 4104.56   1
  14  -3 -10 18851.5 2406.26   1
  11   3 -10 19104.2 2708.80   1
 -11  14  -7 16592.5 3551.46   1
 -14  11  -7 10081.8 2407.03   1
  11   3  -7 14225.9 2398.16   1
 -14  11  -4 9167.69 2175.33   1
 -11  14  -4 16944.4 3212.49   1
 -11  14  -1 16649.3 2995.50   1
 -11  14   2 24438.4 3341.94   1
 -11  14   2 21876.9 2621.12   2
 -11  14   5 11304.8 1813.71   2
 -11  14   5 8734.03 1664.47   1
 -11  14   8 712.710 385.729   1
  12   2 -17 15897.6 2424.94   1
  -2 -12 -17 21250.3 3945.67   2
 -14  12 -17 22991.9 4790.81   1
 -12  14 -17 24649.8 4843.17   1
  12   2 -14 16896.8 2512.74   1
 -14  12 -14 21605.8 4457.64   1
 -12  14 -14 26221.6 4962.65   1
  14  -2 -14 21289.9 2658.20   1
 -14  12 -11 36111.4 5497.09   1
  14  -2 -11 34702.4 3487.23   1
  12   2 -11 32368.6 3645.24   1
  12   2  -8 9537.79 1916.37   1
 -14  12  -8 8807.71 2412.71   1
 -12  14  -8 15553.6 3438.84   1
  12   2  -5 47949.0 3688.60   2
 -14  12  -5 36117.7 4854.44   1
 -14  12  -2 22523.7 3482.01   1
  12   2  -2 28413.4 2753.46   2
 -12  14  -2 33784.2 4487.44   1
 -12  14   1 22800.5 2644.85   2
 -12  14   1 27355.2 3618.37   1
 -12  14   4 13331.3 2193.75   1
 -12  14   7 11754.9 1641.36   1
 -14  13 -15 3222.67 1643.39   1
  14  -1 -15 2721.23 958.230   1
  13   1 -15 2181.08 910.889   1
 -13  14 -15 4805.89 2251.60   1
 -13  14 -12 46169.0 6256.82   1
 -14  13 -12 40497.1 6027.56   1
  14  -1 -12 31104.6 3427.09   1
  13   1 -12 30675.7 3487.08   1
  13   1  -9 2510.28 877.663   1
 -14  13  -9 2052.90 1392.99   1
 -13  14  -9 4314.44 2170.18   1
  14  -1  -9 2357.23 918.166   1
 -13  14  -6 64266.6 6703.72   1
 -14  13  -6 49006.9 6028.65   1
 -13  14  -3 6904.57 2130.89   1
 -14  13  -3 4334.47 1437.70   1
 -14  13   0 56529.0 5310.74   1
 -13  14   0 62999.0 5724.02   1
 -13  14   3 14360.5 2338.08   1
  14   0 -16 10233.2 1970.59   1
 -14  14 -16 19583.3 4378.60   1
  14   0 -13-415.718 688.391   1
 -14  14 -13 1617.64 1214.85   1
  14   0 -10 6586.01 1676.16   1
 -14  14 -10 10498.3 3152.34   1
 -14  14  -7 43.7898 712.930   1
 -14  14  -4 46965.4 5604.38   1
 -14  14  -1-635.287 964.098   1
 -14  14   2 10479.9 2129.53   1
 -15   0 -15-221.188 615.669   2
 -15   0 -12 40314.3 5311.13   2
   0  15 -12 36507.4 3864.68   1
 -15   0  -9 1005.74 829.123   2
   0  15  -9 68.2493 566.004   1
   0  15  -6 62811.0 4885.24   1
   0  15  -3 403.239 477.077   1
   0  15   0 46026.1 4285.27   1
   0  15   3-241.790 347.114   1
   0  15   6 78977.7 5684.79   1
   0  15   9-569.095 890.265   1
   0  15  12 2281.09 860.427   1
 -14  -1 -16 28206.1 5061.58   2
 -15   1 -16 24326.1 4653.30   2
 -14  -1 -13 1692.34 1233.84   2
 -15   1 -13 719.565 879.033   2
   1  14 -13 633.108 620.886   1
  -1  15 -13 864.696 601.046   1
 -14  -1 -10 2671.40 1442.75   2
 -15   1 -10 4470.63 1764.35   2
   1  14 -10 1575.49 770.959   1
  -1  15 -10 2806.81 1071.66   1
 -15   1  -7 746.293 730.840   2
   1  14  -7 1001.31 890.387   1
  -1  15  -7 111.612 508.666   1
   1  14  -4 18975.1 2706.76   1
  -1  15  -4 18232.1 2560.02   1
   1  14  -1 4470.02 1322.68   1
  -1  15  -1 4452.87 1339.37   1
   1  14   2 23714.1 3062.96   1
  -1  15   2 22188.8 2857.92   1
   1  14   5 7121.29 1703.16   1
  -1  15   5 6240.46 1504.33   1
  -1  15   8 15323.1 2405.85   1
   1  14   8 14603.8 2460.45   1
   1  14  11 4533.83 1356.73   1
  -1  15  11 7097.12 1619.23   1
   1  14  14 8548.32 1922.63   1
 -13  -2 -17 10952.0 3264.50   2
 -15   2 -17 6863.99 2351.62   2
  -2  15 -14 8950.80 1842.34   1
   2  13 -14 11457.3 2133.85   1
 -13  -2 -14 11150.8 2997.05   2
 -15   2 -14 7535.98 2290.24   2
 -13  -2 -11 8271.04 2381.63   2
 -15   2 -11 6578.74 2009.45   2
   2  13 -11 7318.05 1617.92   1
  -2  15 -11 6901.92 1634.46   1
   2  13  -8 10666.4 2028.54   1
 -13  -2  -8 12460.6 2615.94   2
 -15   2  -8 9088.43 2125.60   2
  -2  15  -8 8249.73 1757.68   1
 -15   2  -5 2893.52 1023.95   2
   2  13  -5 1660.43 835.399   1
  -2  15  -5 1917.20 879.806   1
   2  13  -2 4305.09 1242.05   1
  -2  15  -2 5213.52 1353.37   1
   2  13   1 1520.67 758.706   1
  -2  15   1 1325.91 797.216   1
  -2  15   4 24787.4 2892.30   1
   2  13   4 27522.6 3316.06   1
   2  13   7-212.422 619.955   1
  -2  15   7 329.062 474.222   1
   2  13  10 6244.63 1598.35   1
  -2  15  10 7795.57 1619.88   1
   2  13  13 5741.68 1539.57   1
  -2  15  13 5136.94 1308.68   1
   2  13  16 3724.90 1212.61   1
 -12  -3 -18 28966.4 5365.02   2
 -15   3 -18 17783.5 3975.69   2
  -3  15 -15 2350.94 847.498   1
 -12  -3 -15 4322.96 2009.23   2
 -15   3 -15 1329.92 513.646   2
   3  12 -15 2773.25 1114.46   1
 -12  -3 -12 51932.7 5994.35   2
   3  12 -12 46897.6 4220.29   1
 -15   3 -12 41365.3 5023.02   2
  -3  15 -12 38707.2 3821.55   1
   3  12  -9 12595.9 2210.91   1
 -12  -3  -9 14043.9 2846.24   2
 -15   3  -9 11182.2 2333.63   2
  -3  15  -9 10496.6 1946.62   1
   3  12  -6 23900.7 3039.82   1
 -15   3  -6 26809.5 3220.73   2
  -3  15  -6 22723.3 2815.86   1
   3  12  -3 18827.4 2770.03   1
  -3  15  -3 17852.9 2412.16   1
  -3  15   0 69516.3 4577.85   1
   3  12   0 75555.2 5534.04   1
   3  12   3 9086.78 1869.63   1
  -3  15   3 10097.7 1761.92   1
  -3  15   6 33724.3 3244.18   1
   3  12   6 32452.2 3777.27   1
   3  12   9 9403.74 2051.95   1
  -3  15   9 9175.52 1649.52   1
  -3  15  12 26599.8 2825.73   1
   3  12  12 25320.5 3411.48   1
 -15   4 -19-519.063 1614.64   2
   4  11 -16 18451.0 2728.85   1
 -15   4 -16 14718.8 3455.74   2
  -4  15 -16 14974.4 2530.21   1
  -4  15 -13 2691.62 891.674   1
 -11  -4 -13 4016.50 1839.48   2
 -15   4 -13 2417.98 1096.52   2
   4  11 -13 4558.38 1387.80   1
  -4  15 -10 4642.24 1286.73   1
 -11  -4 -10 5021.79 1763.57   2
   4  11 -10 4159.40 1309.41   1
 -15   4 -10 3846.40 1373.99   2
   4  11  -7 3874.59 1208.12   1
 -15   4  -7 4602.30 1342.49   2
  -4  15  -7 4904.07 1345.26   1
 -15   4  -4 31086.7 2935.63   2
  -4  15  -4 26700.1 2952.14   1
   4  11  -4 30534.1 3501.11   1
   4  11  -1 2298.82 925.140   1
  -4  15  -1 2423.69 867.024   1
  -4  15   2 19721.9 2382.43   1
   4  11   2 19456.6 2824.32   1
   4  11   5 398.943 240.824   1
  -4  15   5 961.280 524.651   1
  -4  15   8 11106.2 1749.78   1
   4  11   8 8912.63 1968.33   1
  -4  15  11 3962.95 1033.52   1
 -15   5 -20-66.0594 1352.72   2
 -10  -5 -17 1188.14 1163.30   2
  -5  15 -17 580.145 663.573   1
 -15   5 -17-1038.75 1108.11   2
   5  10 -17 1077.26 844.205   1
   5  10 -14 10872.9 2159.78   1
  -5  15 -14 7407.24 1709.62   1
 -10  -5 -14 12933.9 3189.92   2
 -15   5 -14 8952.84 2351.49   2
  -5  15 -11 1186.39 261.494   1
 -10  -5 -11 2533.08 1343.97   2
   5  10 -11 2204.91 943.260   1
 -15   5 -11 1831.84 848.389   2
   5  10  -8 35504.0 3705.51   1
 -10  -5  -8 35760.7 4333.04   2
 -15   5  -8 33829.8 3690.13   2
  -5  15  -8 30722.8 3226.42   1
   5  10  -5 4881.86 1325.40   1
 -15   5  -5 5019.98 1235.48   2
  -5  15  -5 4320.56 1184.40   1
  -5  15  -2 18542.3 2360.51   1
  10 -15  -2 19986.5 2868.90   1
   5  10  -2 18371.6 2694.69   1
   5  10   1 2110.78 904.344   1
  -5  15   1 2769.40 942.247   1
  -5  15   4 45671.6 3539.70   1
   5  10   4 43027.4 4288.95   1
  -5  15   7 212.324 276.117   1
  -5  15  10 1349.00 668.954   1
 -15   6 -21-647.143 1182.45   2
   6   9 -18 44545.1 4247.28   1
 -15   6 -18 30602.3 5183.85   2
  -6  15 -18 38493.7 4871.96   1
  -9  -6 -15 2806.31 1759.44   2
  -6  15 -15 2715.03 1108.00   1
   6   9 -15 1965.08 955.459   1
 -15   6 -15 1440.34 731.794   2
   6   9 -12 36073.5 3757.16   1
  -9  -6 -12 45691.1 5483.48   2
 -15   6 -12 33364.7 4364.83   2
  -6  15 -12 31632.4 3674.10   1
  -9  -6  -9 4433.79 1577.50   2
  -6  15  -9 2603.51 901.682   1
   6   9  -9 3874.04 1268.37   1
 -15   6  -9 3295.84 1109.01   2
 -15   6  -6 73810.6 4832.34   2
  -6  15  -6 65952.6 4698.63   1
   6   9  -6 73194.2 5395.28   1
   9 -15  -3 5175.22 1432.96   1
  -6  15  -3 3059.91 958.955   1
   6   9  -3 3594.95 1039.05   1
 -15   6  -3 4091.84 883.094   2
  15  -9  -3 4611.05 1422.21   1
  -6  15   0 55289.4 3991.97   1
   6   9   0 59348.1 5047.71   1
  -6  15   3 7949.28 1473.14   1
   6   9   3 7929.25 1806.66   1
  -6  15   6 79729.9 4478.47   1
  -6  15   9 7247.26 1297.60   1
 -15   7 -19 3777.77 1832.64   2
   7   8 -19 6132.47 1634.17   1
  -7  15 -16 21322.9 3651.56   1
  -8  -7 -16 30552.1 4934.06   2
   7   8 -16 23297.7 3078.39   1
 -15   7 -16 14149.1 3363.75   2
  -8  -7 -13 7193.93 2219.37   2
   7   8 -13 8894.60 1865.43   1
  -7  15 -13 5983.07 1793.44   1
 -15   7 -13 5411.57 1828.18   2
  -8  -7 -10 1457.07 852.739   2
   7   8 -10 435.929 404.243   1
  -7  15 -10 1183.30 793.968   1
 -15   7 -10 1435.73 1063.41   2
   7   8  -7 5915.76 1495.15   1
  -7  15  -7 2981.71 889.604   1
 -15   7  -7 4121.05 1254.44   2
 -15   7  -4 60970.8 3643.86   2
  15  -8  -4 64783.8 4994.54   1
  -7  15  -4 52580.1 4259.58   1
   7   8  -4 57532.3 4869.25   1
   7   8  -1 2149.66 786.633   1
  -7  15  -1 1309.87 381.853   1
  -7  15   2 20434.7 2320.18   1
  -7  15   5 2166.30 725.742   1
  -7  15   8 42659.2 3132.04   1
 -15   8 -20 2906.89 1778.48   2
   8   7 -20 2171.89 954.700   1
  -7  -8 -17 8158.75 2739.19   2
   8   7 -17 7980.21 1841.16   1
 -15   8 -17 3970.05 1917.64   2
  -8  15 -17 3950.87 1824.88   1
  -7  -8 -14 9530.81 2696.26   2
   8   7 -14 8956.40 1896.94   1
 -15   8 -14 3395.35 1419.73   2
  -8  15 -14 5881.98 1995.75   1
  -7  -8 -11 7746.51 2181.74   2
   8   7 -11 4651.80 1264.99   1
  -8  15 -11 3167.27 1282.54   1
 -15   8 -11 5107.02 1717.42   2
 -15   8  -8 33756.6 3719.93   2
  -8  15  -8 33993.1 4052.30   1
   8   7  -8 39700.3 4041.50   1
   8   7  -5 3777.61 1319.86   1
  -8  15  -5 2886.20 1123.92   1
 -15   8  -5 2340.55 810.250   2
 -15   8  -2 24755.2 1669.11   2
  -8  15  -2 22527.7 2831.36   1
   8   7  -2 29137.7 3506.67   1
  -8  15   1 1396.80 615.001   1
  -8  15   4 51491.8 3849.34   1
  -8  15   7 4104.10 1006.47   1
 -15   9 -21 3555.96 2011.96   2
   9   6 -21 2162.28 1003.88   1
  -9  15 -18 52998.4 6383.85   1
   9   6 -18 48635.9 4362.06   1
 -15   9 -18 47704.0 6641.10   2
  -9  15 -15 1930.99 950.950   1
  -6  -9 -15 2964.80 1692.98   2
   9   6 -15 3283.04 1211.34   1
 -15   9 -15 2569.41 1425.52   2
   9   6 -12 22082.0 2998.23   1
  -9  15 -12 25161.7 4071.39   1
  -6  -9 -12 26818.2 4058.20   2
 -15   9 -12 15351.6 3038.97   2
   9   6  -9 7777.98 1727.48   1
 -15   9  -9 5641.40 1571.61   2
  -9  15  -9 7475.66 2203.87   1
 -15   9  -6 63415.6 4551.12   2
   9   6  -6 72759.5 5581.91   1
  -9  15  -6 63396.1 5870.44   1
   9   6  -3 6837.53 1639.34   1
 -15   9  -3 7605.68 1124.65   2
  -9  15  -3 6172.42 1721.16   1
  -9  15   0 65095.8 5311.12   1
  -9  15   3 2546.94 952.447   1
  -9  15   6 56454.5 4512.64   1
  10   5 -22 6754.22 1724.12   1
  10   5 -19 796.506 560.868   1
 -15  10 -19 4615.50 2543.61   2
  10   5 -16 18669.7 2760.33   1
  -5 -10 -16 24809.7 4370.09   2
 -10  15 -16 22149.0 4154.25   1
 -15  10 -16 21266.7 4546.26   2
 -10  15 -13 1599.63 1249.11   1
  -5 -10 -13 1156.58 1017.51   2
  10   5 -13 790.720 298.587   1
 -15  10 -13 1531.69 1245.07   2
 -10  15 -10 3495.56 1582.72   1
  10   5 -10 2851.69 1036.92   1
 -15  10 -10 2874.94 1239.92   2
  10   5  -7-25.7486 425.329   1
 -15  10  -7 19.3171 496.708   2
 -10  15  -7-664.832 877.681   1
 -10  15  -4 41722.6 4845.92   1
 -15  10  -4 39982.3 3122.54   2
  10   5  -4 41883.6 4251.85   1
 -10  15  -1 1113.92 487.632   1
 -10  15   2 19652.4 3030.96   1
 -10  15   5 3820.85 1184.98   1
  11   4 -20 762.373 305.932   1
  -4 -11 -17 6807.10 2409.16   2
  11   4 -17 3951.73 1353.44   1
 -11  15 -17 7220.78 2799.59   1
 -15  11 -17-332.475 1889.56   1
  11   4 -14 13001.0 2299.27   1
  -4 -11 -14 13987.2 3066.35   2
 -11  15 -14 16570.1 3661.06   1
 -15  11 -14 9508.31 2733.87   1
  15  -4 -11 3638.58 1080.61   1
  11   4 -11 3811.94 1223.32   1
 -11  15 -11 6350.45 2248.79   1
 -15  11 -11 429.911 1947.87   1
  11   4  -8 11680.4 2214.72   1
 -11  15  -8 14212.6 3282.36   1
 -11  15  -5 697.698 758.252   1
  11   4  -5 537.527 380.394   1
 -11  15  -2 22424.7 3570.54   1
 -11  15   1 3290.23 1352.12   1
 -11  15   4 31931.7 3650.63   1
 -11  15   7 3638.27 943.380   1
  12   3 -18 34977.3 3784.23   1
 -15  12 -15 1488.77 694.326   1
  12   3 -15 2837.91 1158.37   1
 -15  12 -12 21180.4 4394.72   1
 -12  15 -12 32248.5 5174.87   1
  15  -3 -12 25622.6 3018.82   1
  12   3 -12 23235.4 3155.55   1
  12   3  -9 9698.99 2070.45   1
 -15  12  -9 5639.17 1986.17   1
 -12  15  -9 12320.8 3230.10   1
 -15  12  -6 24321.7 4052.62   1
  12   3  -6 36682.4 4062.29   1
 -12  15  -3 13539.7 2965.53   1
 -12  15   0 82038.3 6644.16   1
 -12  15   3 17599.5 2825.39   1
 -12  15   6 24808.9 2815.54   1
  13   2 -16 3827.90 1290.15   1
 -13  15 -16 8586.12 3063.77   1
 -15  13 -16 4503.60 2035.74   1
  15  -2 -13 4675.02 1183.80   1
  13   2 -13 4684.97 1366.76   1
 -13  15 -13 8670.05 2867.39   1
 -15  13 -13 5694.47 2125.57   1
  15  -2 -10 6427.68 1498.13   1
  13   2 -10 7166.96 1755.76   1
 -13  15 -10 8811.32 2891.63   1
 -15  13 -10 5090.27 1874.22   1
 -15  13  -7-1735.15 1557.79   1
 -13  15  -7 1427.65 1550.23   1
  13   2  -7 475.965 535.448   1
 -15  13  -4 21424.6 3691.04   1
 -13  15  -4 37838.8 5051.01   1
 -13  15  -1 3389.40 1505.88   1
 -13  15   2 2934.48 1073.97   1
 -13  15   5 1417.76 651.246   1
  15  -1 -14 9017.94 1863.36   1
  14   1 -14 10050.4 2074.43   1
 -15  14 -14 14126.1 3670.65   1
 -14  15 -14 14269.2 3616.40   1
  15  -1 -11 6389.91 1652.21   1
  14   1 -11 5733.98 1603.25   1
 -15  14 -11 8938.84 2736.01   1
 -14  15 -11 8513.40 2744.78   1
 -14  15  -8 20267.2 4052.85   1
 -15  14  -8 15346.4 3502.77   1
  14   1  -8 15127.0 2644.36   1
 -15  14  -5 4209.89 1508.71   1
 -14  15  -5 9524.19 2705.72   1
 -14  15  -2 26684.6 4038.89   1
 -15  14  -2 17115.5 3145.52   1
 -14  15   1 2865.87 1088.61   1
 -14  15   4 16673.0 2485.36   1
 -15  15 -12 3832.23 1974.99   1
  15   0 -12 2045.20 657.737   1
 -15  15  -9-729.595 1105.44   1
  15   0  -9-640.071 781.260   1
 -15  15  -6 93732.2 8445.70   1
 -15  15  -3-462.553 649.330   1
 -15  15   0 46487.2 5013.61   1
 -16   0 -13-805.574 414.829   2
 -16   0 -10 3281.48 1443.02   2
   0  16  -7 952.542 762.761   1
   0  16  -4 22950.9 3043.63   1
   0  16  -1 473.751 584.215   1
   0  16   2 18456.7 2808.01   1
   0  16   5 469.946 417.657   1
   0  16   8 40675.9 4256.41   1
   0  16  11-234.621 603.335   1
 -16   1 -17 128.575 931.977   2
 -15  -1 -14 12567.7 3176.09   2
 -16   1 -14 11037.8 3071.59   2
 -15  -1 -11 1828.37 1297.48   2
 -16   1 -11 841.445 863.195   2
 -16   1  -8 25936.6 3669.42   2
   1  15  -8 22166.4 2996.65   1
  -1  16  -8 24080.8 3134.47   1
   1  15  -5 1993.95 987.245   1
  -1  16  -5 817.374 872.316   1
   1  15  -2 91.1224 256.832   1
  -1  16  -2 1719.93 909.929   1
   1  15   1 844.793 758.377   1
  -1  16   1 1831.19 1041.95   1
   1  15   4 27151.1 3435.84   1
  -1  16   4 27335.6 3346.79   1
   1  15   7-355.148 463.285   1
  -1  16   7 835.331 656.485   1
   1  15  10 5104.93 1422.16   1
  -1  16  10 4081.92 1211.57   1
   1  15  13 347.622 289.805   1
 -16   2 -18 13283.6 3555.95   2
 -14  -2 -15 4903.76 2201.48   2
 -16   2 -15 643.509 654.676   2
 -14  -2 -12 45612.5 5760.02   2
 -16   2 -12 38777.2 5155.16   2
   2  14 -12 36867.7 3936.62   1
  -2  16 -12 33371.0 3699.12   1
 -14  -2  -9 7834.00 2188.00   2
 -16   2  -9 6046.56 1767.53   2
   2  14  -9 6586.84 1656.93   1
  -2  16  -9 6091.36 1541.51   1
   2  14  -6 21819.6 2998.86   1
  -2  16  -6 19531.3 2734.94   1
   2  14  -3 7215.27 1761.55   1
  -2  16  -3 4590.78 1273.66   1
   2  14   0 37870.9 4016.56   1
  -2  16   0 34255.8 3464.41   1
   2  14   3 1920.46 809.520   1
  -2  16   3 2578.25 1045.72   1
  -2  16   6 44075.7 3999.72   1
   2  14   6 46174.6 4622.64   1
   2  14   9-622.326 802.238   1
  -2  16   9 606.073 516.676   1
   2  14  12 9705.22 2091.53   1
   2  14  15 47.3371 362.315   1
 -16   3 -19-296.324 1161.51   2
 -13  -3 -16 17844.4 4105.13   2
 -16   3 -16 13446.5 3392.44   2
  -3  16 -13 2659.60 930.033   1
 -13  -3 -13 4186.08 1860.62   2
 -16   3 -13 3314.63 1463.64   2
   3  13 -13 2595.40 1107.82   1
 -13  -3 -10 2542.30 1479.87   2
 -16   3 -10 2189.85 1109.98   2
   3  13 -10 2172.29 1023.84   1
  -3  16 -10 1734.48 828.784   1
 -16   3  -7 1184.33 693.848   2
   3  13  -7 1475.96 863.910   1
  -3  16  -7 1246.86 820.234   1
   3  13  -4 15322.8 2549.22   1
  -3  16  -4 13362.2 2161.28   1
   3  13  -1 2413.28 876.805   1
  -3  16  -1 3083.86 995.880   1
  -3  16   2 17795.8 2400.80   1
   3  13   2 18326.6 2819.70   1
   3  13   5 9935.43 2047.47   1
  -3  16   5 8765.73 1727.96   1
   3  13   8 4963.56 1425.58   1
  -3  16   8 6021.61 1392.92   1
   3  13  11 5801.27 1659.22   1
  -3  16  11 4961.63 1274.25   1
   3  13  14 11158.2 2394.36   1
   3  13  17-366.377 844.899   1
 -16   4 -17 934.223 451.575   2
  -4  16 -14 4412.15 1316.62   1
 -12  -4 -14 7197.62 2574.53   2
 -16   4 -14 4718.26 1651.10   2
   4  12 -14 6357.52 1651.93   1
  -4  16 -11 75.1676 278.328   1
 -12  -4 -11 370.287 1022.75   2
 -16   4 -11 647.881 674.559   2
   4  12 -11 780.888 889.396   1
   4  12  -8 11391.1 2152.47   1
 -16   4  -8 10799.5 2208.46   2
  -4  16  -8 7420.20 1642.50   1
   4  12  -5 10207.9 2040.15   1
  -4  16  -5 8916.26 1780.55   1
   4  12  -2 7795.01 1822.83   1
  -4  16  -2 7715.91 1578.86   1
  -4  16   1 15069.1 2192.25   1
   4  12   1 17982.4 2791.37   1
  -4  16   4 24397.0 2757.08   1
   4  12   4 27630.7 3560.43   1
   4  12   7 7854.05 1915.56   1
  -4  16   7 8819.07 1673.27   1
   4  12  10 2432.68 1115.58   1
  -4  16  10 3663.50 1104.91   1
   4  12  13 170.599 504.985   1
 -16   5 -18 24574.0 4629.71   2
  -5  16 -15 2374.98 914.516   1
 -16   5 -15 1508.19 608.085   2
   5  11 -15 4137.10 1380.08   1
   5  11 -12 10292.6 2121.79   1
  -5  16 -12 6928.69 1570.43   1
 -11  -5 -12 10968.9 2911.61   2
 -16   5 -12 10793.2 2545.61   2
  -5  16  -9 1266.75 638.593   1
   5  11  -9 1942.84 782.287   1
 -16   5  -9 1894.54 926.213   2
   5  11  -6 56746.7 4891.56   1
 -16   5  -6 57808.7 4445.08   2
  -5  16  -6 48585.5 4129.96   1
   5  11  -3 990.032 515.966   1
  -5  16  -3 1186.04 654.254   1
  -5  16   0 29769.9 3087.19   1
   5  11   0 28772.4 3557.17   1
   5  11   3 139.988 243.426   1
  -5  16   3 1118.98 567.672   1
  -5  16   6 56565.8 4068.33   1
   5  11   6 57986.7 5302.97   1
  -5  16   9 5311.13 1225.57   1
 -16   6 -19-1489.09 1629.00   2
 -10  -6 -16 32695.3 5380.80   2
   6  10 -16 26850.9 3356.66   1
 -16   6 -16 18983.4 3786.19   2
 -10  -6 -13 2608.76 1340.48   2
  -6  16 -13 2454.40 1119.94   1
   6  10 -13 3668.84 1169.64   1
 -16   6 -13 1320.51 803.737   2
 -10  -6 -10 7205.21 2102.93   2
  -6  16 -10 5206.46 1358.62   1
   6  10 -10 7061.09 1694.96   1
 -16   6 -10 5799.62 1665.56   2
  -6  16  -7 5892.48 1337.01   1
   6  10  -7 7254.09 1773.52   1
 -16   6  -7 7376.86 1602.59   2
  -6  16  -4 45463.1 3903.23   1
   6  10  -4 49549.0 4661.12   1
   6  10  -1 4554.67 1429.32   1
  -6  16  -1 3859.58 1083.16   1
   6  10   2 4375.50 1428.05   1
  -6  16   2 5516.48 1297.41   1
   6  10   5 455.467 539.928   1
  -6  16   5 1137.53 609.996   1
  -6  16   8 39524.5 3269.87   1
 -16   7 -20 6701.62 2363.56   2
   7   9 -17 2957.81 1244.27   1
 -16   7 -17-672.446 1243.65   2
  -9  -7 -14 5872.01 2052.65   2
   7   9 -14 8945.79 1966.08   1
  -7  16 -14 4535.43 1532.72   1
 -16   7 -14 4531.61 1634.92   2
  -9  -7 -11 7485.06 2222.20   2
   7   9 -11 7687.13 1793.50   1
  -7  16 -11 6840.60 1879.70   1
 -16   7 -11 7534.79 1951.25   2
 -16   7  -8 19003.5 2741.97   2
  -7  16  -8 15314.0 2485.68   1
   7   9  -8 24230.7 3184.33   1
   7   9  -5 6062.05 1528.02   1
  -7  16  -5 4403.04 1240.05   1
   7   9  -2 5383.43 1582.27   1
  -7  16  -2 3259.73 896.489   1
   7   9   1 327.150 307.084   1
  -7  16   1 13.1945 425.850   1
  -7  16   4 31762.9 3015.86   1
  -7  16   7 1490.03 580.447   1
 -16   8 -21 281.032 487.505   2
   8   8 -18 30373.2 3627.94   1
 -16   8 -18 23234.1 4547.08   2
  -8  -8 -15 2217.25 1632.05   2
   8   8 -15 922.684 693.403   1
 -16   8 -15-571.349 1073.08   2
  -8  16 -15 38.2459 698.172   1
   8   8 -12 19993.6 2981.71   1
  -8  -8 -12 22259.7 3856.39   2
 -16   8 -12 14964.5 3025.01   2
  -8  16 -12 16174.5 3022.16   1
   8   8  -9 5892.29 1498.02   1
  -8  16  -9 6218.16 1760.19   1
 -16   8  -9 4830.21 1386.49   2
  -8  16  -6 54907.0 4784.91   1
   8   8  -6 62740.9 5278.10   1
   8   8  -3 10514.7 2157.72   1
  -8  16  -3 9884.99 1922.92   1
  -8  16   0 19927.4 2567.09   1
   8   8   0 22783.1 3318.94   1
  -8  16   3 8614.19 1606.92   1
  -8  16   6 60796.3 4156.79   1
   9   7 -19 965.491 672.409   1
 -16   9 -19 480.230 964.422   2
  -9  16 -16 35005.0 5083.75   1
   9   7 -16 34535.4 3873.86   1
 -16   9 -16 27223.6 4621.40   2
  -7  -9 -13 2619.08 1456.36   2
   9   7 -13 947.573 678.603   1
 -16   9 -13 1725.02 1143.53   2
  -9  16 -13 1215.26 471.253   1
   9   7 -10 5364.78 1482.42   1
 -16   9 -10 4020.55 1442.09   2
  -9  16 -10 3341.80 1473.65   1
   9   7  -7 632.612 557.223   1
  -9  16  -7 736.523 330.081   1
   9   7  -4 33690.3 3969.53   1
  -9  16  -4 26723.1 3645.43   1
  -9  16  -1 459.403 408.779   1
   9   7  -1-66.7793 642.823   1
  -9  16   2 6517.81 1632.80   1
  -9  16   5 6492.30 1569.31   1
  10   6 -20 10875.9 2274.07   1
 -16  10 -20 15848.6 4106.82   2
  10   6 -17 630.593 791.085   1
 -16  10 -17 2681.13 1758.72   2
  10   6 -14 14413.3 2534.16   1
  -6 -10 -14 18622.6 3675.31   2
 -10  16 -14 17998.4 3686.07   1
 -16  10 -14 14315.5 3264.10   2
 -10  16 -11-321.311 602.044   1
  10   6 -11 165.344 538.054   1
 -16  10 -11 503.259 773.642   2
 -10  16  -8 31953.6 4450.38   1
 -16  10  -8 26481.2 3335.02   2
  10   6  -8 32412.2 3863.71   1
  10   6  -5 952.217 645.660   1
 -10  16  -5-1327.77 1161.23   1
 -10  16  -2 5086.53 1447.61   1
 -10  16   1 3783.26 1292.03   1
 -10  16   4 38938.9 4152.91   1
  11   5 -18 34000.6 3852.68   1
 -16  11 -18 41199.2 6379.79   2
  11   5 -15 7103.62 1775.65   1
 -11  16 -15 9360.17 2733.89   1
 -16  11 -15 10472.5 3152.71   2
 -11  16 -12 38854.0 5431.57   1
 -16  11 -12 29412.9 4538.88   2
  11   5 -12 28899.0 3605.04   1
  11   5  -9 2349.62 977.885   1
 -11  16  -9 3167.86 1453.65   1
 -16  11  -9 2772.71 1180.18   2
 -11  16  -6 57906.3 6144.79   1
  11   5  -6 52782.3 5017.07   1
 -11  16  -3 873.770 855.074   1
 -11  16   0 35626.9 4465.78   1
 -11  16   3 1994.10 970.588   1
  12   4 -19 2579.46 1035.73   1
  12   4 -16 18793.2 2864.47   1
  12   4 -13 1697.41 858.206   1
 -16  12 -13-1324.93 1932.47   1
 -12  16 -13 3865.45 2048.35   1
  12   4 -10 1461.49 499.670   1
 -12  16 -10 4831.00 2017.07   1
  12   4  -7 8860.58 2041.97   1
 -12  16  -7 9973.19 2775.05   1
 -12  16  -4 35040.0 4785.01   1
 -12  16  -1 19811.5 3434.63   1
 -12  16   2 8755.33 2098.77   1
  13   3 -17 1263.61 954.344   1
  13   3 -14 11979.6 2284.54   1
 -16  13 -14 11824.0 3213.34   1
 -13  16 -14 18364.5 4126.79   1
  16  -3 -11 5834.96 1524.34   1
  13   3 -11 4215.03 1292.07   1
 -16  13 -11 3889.11 1386.14   1
  13   3  -8 5599.02 1552.84   1
 -16  13  -8 2713.14 1038.77   1
 -13  16  -5 13114.4 3297.32   1
 -13  16  -2 22717.8 3912.05   1
 -13  16   1 4564.51 1720.85   1
  14   2 -15 108.341 312.718   1
 -16  14 -12 12595.1 3428.24   1
 -14  16 -12 12975.4 3441.93   1
  16  -2 -12 14069.2 2414.96   1
  14   2 -12 12897.5 2421.91   1
  14   2  -9 88.9170 528.009   1
  16  -2  -9 230.365 659.265   1
 -14  16  -6 54712.1 6372.98   1
 -16  14  -6 33022.5 4985.88   1
 -14  16  -3 2942.88 1480.26   1
 -14  16   0 33521.4 4407.04   1
  15   1 -13 1431.79 645.687   1
 -16  15 -13 1979.84 1409.89   1
 -15  16 -13 1474.79 1197.99   1
  16  -1 -10 6363.21 1766.74   1
  15   1 -10 4931.97 1453.07   1
 -16  15 -10 5171.42 1976.11   1
 -15  16 -10 9761.29 2982.76   1
  15   1  -7-73.3765 521.490   1
 -15  16  -7 760.547 1045.80   1
 -16  15  -7-1114.53 1405.01   1
 -15  16  -4 29072.5 4647.10   1
 -16  15  -4 20653.2 3696.66   1
 -15  16  -1-648.492 1014.27   1
  16   0 -11-104.403 414.820   1
 -16  16 -11-286.914 1148.00   1
 -16  16  -8 44827.5 6241.74   1
  16   0  -8 40031.9 4650.73   1
 -16  16  -5-875.415 1307.80   1
 -16  16  -2 16525.6 3159.83   1
   0  17  -2 3780.44 1384.31   1
   0  17   1 508.684 697.199   1
   0  17   4 6502.68 1777.66   1
   0  17   7 228.360 587.223   1
   0  17  10 2746.01 1119.19   1
 -16  -1 -12 19026.3 3788.78   2
  -1  17  -6 42009.9 4244.63   1
   1  16  -3 367.711 566.201   1
  -1  17  -3 1246.72 719.121   1
   1  16   0 21352.5 3155.00   1
  -1  17   0 21450.8 3008.54   1
   1  16   3 1269.58 857.180   1
  -1  17   3 580.341 855.651   1
   1  16   6 40245.0 4401.56   1
  -1  17   6 36127.0 3965.47   1
   1  16   9 1574.57 943.315   1
  -1  17   9 3056.00 1239.80   1
   1  16  12 15674.4 2733.31   1
 -15  -2 -13 5308.96 2098.81   2
   2  15  -7 6435.29 1766.92   1
  -2  17  -7 5152.38 1515.17   1
   2  15  -4 5326.18 1557.80   1
  -2  17  -4 5198.87 1404.32   1
   2  15  -1 3343.50 1323.10   1
  -2  17  -1 1596.58 689.967   1
   2  15   2 14360.9 2584.30   1
  -2  17   2 14763.3 2408.34   1
   2  15   5 2079.34 1003.07   1
  -2  17   5 3168.32 1191.30   1
   2  15   8 6725.78 1761.97   1
  -2  17   8 7700.99 1714.05   1
   2  15  11 3763.74 1270.02   1
   2  15  14 5193.26 1658.23   1
 -14  -3 -14 3135.38 1646.04   2
 -14  -3 -11 4710.22 1855.45   2
   3  14  -8 7231.20 1815.39   1
  -3  17  -8 6195.38 1563.87   1
   3  14  -5 7554.28 1788.84   1
  -3  17  -5 8532.03 1791.53   1
   3  14  -2 5738.91 1607.71   1
  -3  17  -2 5187.23 1473.89   1
   3  14   1 7483.91 1834.04   1
  -3  17   1 7587.46 1704.31   1
   3  14   4 3464.33 1285.64   1
  -3  17   4 4097.52 1238.88   1
   3  14   7 2588.72 828.740   1
  -3  17   7 3949.72 1220.18   1
   3  14  10 12743.4 2527.69   1
   3  14  13 3803.97 1423.72   1
   3  14  16 1138.01 885.750   1
 -13  -4 -12 34905.6 5174.96   2
   4  13  -9 15501.8 2613.27   1
  -4  17  -9 10480.9 2054.24   1
   4  13  -6 41908.5 4378.08   1
  -4  17  -6 38198.8 3780.47   1
   4  13  -3 15398.8 2639.28   1
  -4  17  -3 15408.0 2377.36   1
  -4  17   0 33045.9 3409.48   1
   4  13   0 35455.0 4101.54   1
   4  13   3 8135.08 1952.84   1
  -4  17   3 7996.35 1674.81   1
  -4  17   6 23829.3 2827.17   1
   4  13   6 25480.2 3604.19   1
   4  13   9 8055.04 2022.16   1
  -4  17   9 8340.36 1683.95   1
   4  13  12 25331.8 3735.64   1
   4  13  15 8856.57 2175.74   1
 -12  -5 -13 17619.2 3720.83   2
  -5  17 -10 6139.98 1627.22   1
   5  12 -10 7548.27 1788.27   1
   5  12  -7 12765.3 2439.57   1
  -5  17  -7 10465.9 1945.99   1
   5  12  -4 15751.2 2702.92   1
  -5  17  -4 13922.3 2206.75   1
   5  12  -1 6618.89 1696.52   1
  -5  17  -1 7230.47 1577.74   1
   5  12   2 5189.16 1543.74   1
  -5  17   2 4499.83 1277.71   1
   5  12   5 12027.1 2485.49   1
  -5  17   5 10209.8 1802.16   1
  -5  17   8 24997.4 2759.26   1
   5  12   8 25093.2 3649.14   1
   5  12  11 6089.66 1790.58   1
 -11  -6 -14 2703.34 1669.25   2
  -6  17 -11 565.483 445.986   1
   6  11 -11 1551.72 915.096   1
   6  11  -8 17545.4 2804.39   1
  -6  17  -8 12183.2 2160.45   1
  -6  17  -5 7596.78 1616.62   1
   6  11  -5 9897.92 2042.39   1
  -6  17  -2 12231.3 2017.48   1
   6  11  -2 13837.1 2661.73   1
  -6  17   1 17165.7 2388.15   1
   6  11   1 20137.6 3162.00   1
  -6  17   4 13970.5 2089.71   1
   6  11   4 14439.8 2716.49   1
   6  11   7 12834.3 2640.33   1
  -6  17   7 12247.8 1904.24   1
   7  10 -12 14045.2 2527.01   1
 -10  -7 -12 17349.4 3535.33   2
  -7  17 -12 12468.1 2453.08   1
  -7  17  -9 1706.54 915.210   1
   7  10  -9 1843.13 1011.87   1
  -7  17  -6 68916.7 5228.94   1
   7  10  -6 83850.9 6274.98   1
   7  10  -3 559.033 435.862   1
  -7  17  -3 244.303 365.862   1
  -7  17   0 23341.4 2782.18   1
   7  10   0 27082.4 3703.30   1
   7  10   3-574.352 832.306   1
  -7  17   3 66.7971 419.462   1
  -7  17   6 45457.1 3662.55   1
  -9  -8 -13 3633.85 1871.93   2
   8   9 -13 2505.27 1027.61   1
  -8  17 -13 635.676 573.475   1
   8   9 -10 14390.7 2567.48   1
  -8  17 -10 11563.4 2529.50   1
   8   9  -7 3267.47 1355.82   1
  -8  17  -7 3979.40 1376.17   1
   8   9  -4 4485.80 1437.43   1
  -8  17  -4 2789.05 988.900   1
   8   9  -1 9800.84 2239.64   1
  -8  17  -1 6447.85 1498.07   1
  -8  17   2 12590.0 2073.41   1
   8   9   2 15587.8 2785.13   1
  -8  17   5 6525.35 1367.08   1
   9   8 -14 2131.53 963.688   1
  -9  17 -14 774.484 448.900   1
   9   8 -11 3229.95 1252.18   1
  -9  17 -11 797.878 515.053   1
  -9  17  -8 16288.5 3063.32   1
   9   8  -8 21082.1 3147.33   1
   9   8  -5 8452.51 2027.68   1
  -9  17  -5 5364.32 1607.23   1
   9   8  -2 18550.3 3054.62   1
  -9  17  -2 12644.8 2394.69   1
   9   8   1 7975.99 2036.83   1
  -9  17   1 8502.79 1853.06   1
  -9  17   4 4115.51 1295.75   1
  10   7 -15 2066.64 998.637   1
  10   7 -12 40443.5 4338.55   1
 -10  17 -12 39720.0 5272.54   1
  10   7  -9 595.963 428.333   1
 -10  17  -9-32.7361 904.761   1
 -10  17  -6 37216.8 4719.42   1
  10   7  -6 41649.8 4583.33   1
  10   7  -3-479.419 972.802   1
 -10  17  -3-73.1986 491.716   1
 -10  17   0 25399.6 3613.77   1
 -10  17   3 735.353 248.498   1
  11   6 -16 23910.3 3312.82   1
 -11  17 -13 8558.84 2563.92   1
  11   6 -13 5960.41 1602.77   1
 -11  17 -10 3002.12 1527.23   1
  11   6 -10 1205.23 708.542   1
 -11  17  -7 11441.8 2803.05   1
  11   6  -7 11537.2 2471.08   1
 -11  17  -4 11623.7 2614.80   1
  11   6  -4 13254.8 2626.33   1
 -11  17  -1 19690.5 3374.09   1
 -11  17   2 16525.4 2982.09   1
  12   5 -17 2918.21 1162.00   1
  12   5 -14 1245.70 812.730   1
  12   5 -11 7637.98 1858.83   1
 -12  17 -11 13426.2 3259.44   1
 -12  17  -8 28790.4 4530.06   1
  12   5  -8 26190.5 3699.35   1
  12   5  -5 12874.3 2652.17   1
 -12  17  -5 14556.0 3230.60   1
 -12  17  -2 4952.49 1738.07   1
 -12  17   1 9770.20 2318.53   1
  13   4 -15 7120.99 1822.90   1
 -13  17 -12 35616.5 5521.59   1
  13   4 -12 24587.2 3480.58   1
  13   4  -9 7989.24 2062.70   1
 -13  17  -9 9434.43 2883.69   1
 -13  17  -6 32679.1 4898.16   1
  13   4  -6 27228.9 3896.35   1
 -13  17  -3 11997.9 2838.12   1
 -13  17   0 37316.8 4682.91   1
  14   3 -16 3080.17 1192.13   1
  14   3 -13 3597.79 1316.50   1
 -17  14 -10 12670.1 3051.91   1
  17  -3 -10 16945.7 2737.84   1
 -14  17 -10 19538.2 4027.12   1
  14   3 -10 15539.0 2860.77   1
  14   3  -7 2699.94 1302.28   1
 -14  17  -7 5878.27 2317.93   1
 -14  17  -4 8250.67 2401.53   1
 -14  17  -1 9070.59 2425.47   1
  15   2 -14 5260.47 1524.10   1
  17  -2 -11 4639.82 1510.88   1
  15   2 -11 2784.71 1051.32   1
 -17  15 -11 3081.12 1522.42   1
 -15  17 -11 6956.44 2795.40   1
 -17  15  -8 3597.61 1500.94   1
  15   2  -8 6998.92 1905.02   1
 -15  17  -8 9439.26 2972.07   1
 -15  17  -5 3209.09 1444.60   1
 -15  17  -2 15465.7 3259.10   1
  16   1 -12 19711.0 3212.81   1
  17  -1  -9 1792.11 1113.22   1
 -16  17  -9 2135.72 1521.83   1
  16   1  -9 687.781 537.869   1
 -17  16  -9-113.957 1188.47   1
 -17  16  -6 31534.5 5043.34   1
 -16  17  -6 38336.0 5524.91   1
 -16  17  -3-803.174 970.700   1
 -17  16  -3-1973.98 1876.42   1
  17   0 -10 3121.30 1249.22   1
  17   0  -7-685.566 1055.08   1
 -17  17  -7-3076.80 1991.74   1
 -17  17  -4 2973.24 1254.39   1
  -1  18   2 1214.06 860.030   1
   1  17   5 1919.00 983.920   1
  -1  18   5 3476.86 1306.65   1
  -1  18   8 12242.0 2407.42   1
   1  17   8 11300.9 2419.78   1
  -2  18  -2 13984.8 2420.06   1
   2  16   1 8111.74 2004.50   1
  -2  18   1 7506.22 1752.90   1
   2  16   4 2430.44 1061.90   1
  -2  18   4 4439.75 1437.00   1
   2  16   7 4425.53 1270.75   1
  -2  18   7 3937.94 1292.80   1
   2  16  10 12016.9 2470.85   1
  -3  18  -6 12037.5 2202.80   1
   3  15  -3 2382.90 1149.41   1
  -3  18  -3 2139.17 888.325   1
   3  15   0 36131.2 4262.49   1
  -3  18   0 33985.4 3679.15   1
   3  15   3 5685.64 1627.99   1
  -3  18   3 6358.48 1567.91   1
  -3  18   6 14221.1 2343.10   1
   3  15   6 14192.6 2704.50   1
   3  15   9 7784.28 1982.97   1
   3  15  12 32054.7 4263.47   1
  -4  18  -7 4233.70 1271.82   1
   4  14  -4 891.502 700.699   1
  -4  18  -4 1355.11 681.861   1
   4  14  -1 9166.94 2148.43   1
  -4  18  -1 6888.11 1631.41   1
  -4  18   2 16046.2 2434.55   1
   4  14   2 15933.4 2850.04   1
   4  14   5 9266.64 2097.22   1
  -4  18   5 10944.2 1971.20   1
   4  14   8 5212.32 1603.12   1
   4  14  11 9389.66 2350.69   1
   4  14  14 10523.3 2598.44   1
  -5  18  -8 4211.34 1220.38   1
  -5  18  -5 8330.99 1763.52   1
   5  13  -5 8478.95 2022.84   1
   5  13  -2 7245.87 1945.46   1
  -5  18  -2 8030.26 1784.71   1
   5  13   1 7263.06 1932.82   1
  -5  18   1 7443.37 1672.33   1
   5  13   4 1920.80 812.246   1
  -5  18   4 3120.32 1053.89   1
   5  13   7 6081.20 1769.31   1
  -5  18   7 5614.91 1364.90   1
   5  13  10 9133.09 2411.57   1
   5  13  13 5964.72 1729.24   1
  -6  18  -9 3384.32 1006.28   1
   6  12  -6 53663.1 5142.85   1
  -6  18  -6 40645.4 3982.47   1
  -6  18  -3 2402.53 928.644   1
   6  12  -3 3789.09 1346.72   1
   6  12   0 12203.7 2496.31   1
  -6  18   0 11548.9 2035.42   1
   6  12   3 5587.56 1759.96   1
  -6  18   3 5963.13 1432.33   1
  -6  18   6 33710.9 3329.28   1
   6  12   6 33989.4 4460.31   1
   6  12   9 7670.14 2079.10   1
   6  12  12 25154.9 4051.12   1
   7  11 -10 17906.3 2968.30   1
  -7  18 -10 14137.0 2575.16   1
  -7  18  -7 2462.74 983.873   1
   7  11  -7 5354.55 1642.89   1
  -7  18  -4 2899.29 900.619   1
   7  11  -4 4407.85 1476.02   1
  -7  18  -1 3017.97 923.203   1
   7  11  -1 4837.44 1532.22   1
  -7  18   2 1149.65 627.052   1
   7  11   2 2494.47 1049.57   1
   7  11   5 3704.60 1353.26   1
  -7  18   5 3932.05 1133.63   1
   7  11   8 21757.6 3559.91   1
   8  10 -11 674.078 475.752   1
  -8  18 -11-288.005 398.621   1
   8  10  -8 2059.18 967.506   1
  -8  18  -8 1491.32 843.490   1
   8  10  -5 2183.60 881.070   1
  -8  18  -5 2511.16 882.318   1
  -8  18  -2 21971.3 2874.27   1
   8  10  -2 28405.2 3916.58   1
   8  10   1 2354.35 1222.07   1
  -8  18   1 504.407 354.030   1
   8  10   4-516.481 904.934   1
  -8  18   4-775.893 976.244   1
  -9  18 -12 44558.7 5385.53   1
   9   9 -12 52854.1 5113.01   1
   9   9  -9 4263.35 1507.43   1
  -9  18  -9 2346.96 1068.37   1
  -9  18  -6 13636.2 2640.95   1
   9   9  -6 17104.3 2902.90   1
   9   9  -3 2910.66 1370.76   1
  -9  18  -3 1241.72 797.419   1
  -9  18   0 31111.5 3576.88   1
   9   9   0 35508.7 4473.30   1
  -9  18   3 1060.13 606.271   1
   9   9   3 704.543 501.263   1
  10   8 -10 27964.9 3761.62   1
 -10  18 -10 23181.7 3876.98   1
  10   8  -7 2025.36 826.212   1
 -10  18  -7 2304.48 944.666   1
  10   8  -4-180.862 361.976   1
 -10  18  -4 762.891 654.994   1
  10   8  -1 2826.65 1224.93   1
 -10  18  -1 1415.83 882.935   1
 -10  18   2 25749.5 3571.33   1
 -11  18 -11 773.007 639.497   1
  11   7 -11 1751.82 954.573   1
 -11  18  -8 19618.4 3660.20   1
  11   7  -8 18001.1 3079.52   1
  11   7  -5 4500.25 1492.42   1
 -11  18  -5 3500.65 1359.15   1
  11   7  -2 2105.45 1060.71   1
 -11  18  -2 1303.01 809.532   1
 -11  18   1 3640.49 1282.14   1
  12   6 -12 28659.5 3862.09   1
 -12  18 -12 28529.1 4710.97   1
  12   6  -9 6337.16 1809.02   1
 -12  18  -9 9826.59 2685.42   1
 -12  18  -6 39227.9 5192.96   1
  12   6  -6 41146.3 4810.75   1
  12   6  -3 6050.52 1818.15   1
 -12  18  -3 5481.28 1879.10   1
 -12  18   0 11001.6 2486.86   1
  13   5 -13 3954.25 1411.11   1
  13   5 -10 8919.36 2168.15   1
 -13  18 -10 11563.5 3293.26   1
  13   5  -7 4950.40 1616.70   1
 -13  18  -7 8124.80 2582.07   1
  13   5  -4 3747.73 1273.09   1
 -13  18  -4 5933.84 2117.26   1
 -13  18  -1 8428.63 2304.98   1
  14   4 -11 10395.7 2341.01   1
 -14  18 -11 15813.4 3686.44   1
  14   4  -8 8240.00 1903.10   1
 -14  18  -8 13337.2 3399.83   1
  14   4  -5 13018.6 2739.36   1
 -14  18  -5 16520.8 3564.55   1
 -14  18  -2 22838.5 3899.47   1
  15   3 -12 30553.0 4096.86   1
  15   3  -9 5400.62 1784.89   1
 -15  18  -9 8259.24 2800.47   1
  15   3  -6 14356.6 2893.34   1
 -15  18  -6 17924.6 3722.36   1
 -15  18  -3 8517.70 2480.82   1
  16   2 -10 17010.6 3079.58   1
  16   2  -7 2059.90 999.709   1
 -16  18  -7 3734.86 1763.93   1
 -16  18  -4 280.764 473.973   1
  18  -1  -8 11358.3 2568.37   1
 -17  18  -8 11846.1 3176.99   1
 -18  17  -8 10662.1 3087.20   1
 -17  18  -5-108.908 1169.22   1
  -3  19  -1 1985.68 1120.17   1
  -3  19   2 13738.6 2416.63   1
  -3  19   5 3694.32 1206.13   1
  -4  19  -2 17900.2 2744.21   1
  -4  19   1 1428.68 863.357   1
  -4  19   4 1373.97 902.587   1
  -5  19  -3 9478.44 1957.87   1
  -5  19   0 21284.2 2890.67   1
  -5  19   3 6339.04 1600.22   1
  -6  19  -7 547.713 492.179   1
  -6  19  -4 5299.00 1302.54   1
  -6  19  -1 1948.46 857.753   1
   6  13   2 2195.53 968.846   1
  -6  19   2 2965.99 1080.45   1
  -6  19   5 4788.20 1323.71   1
  -7  19  -8 2888.53 904.352   1
  -7  19  -5 1240.80 380.552   1
  -7  19  -2 9213.99 1820.20   1
  -7  19   1 1476.56 650.487   1
   7  12   1 3321.16 1324.34   1
  -7  19   4 3821.91 1121.16   1
   7  12   4 6814.12 1948.49   1
  -8  19  -9 4180.91 1403.35   1
  -8  19  -6 15686.2 2678.89   1
   8  11  -3 7067.23 2038.70   1
  -8  19  -3 2258.96 839.626   1
  -8  19   0 21753.3 2870.99   1
   8  11   0 33417.2 4394.57   1
   8  11   3 2350.43 1173.03   1
  -8  19   3 2161.75 799.865   1
   8  11   6 13286.3 2925.55   1
  -9  19  -7 347.214 436.102   1
   9  10  -4 1327.79 741.396   1
  -9  19  -4 2090.68 1170.88   1
   9  10  -1 6084.53 2002.47   1
  -9  19  -1 5553.92 1603.85   1
  -9  19   2 23047.5 3094.10   1
   9  10   2 29471.2 4363.49   1
   9  10   5 8441.92 2267.13   1
 -10  19  -8-1015.63 1323.91   1
  10   9  -5 7784.92 2096.64   1
 -10  19  -5 6231.20 1915.96   1
  10   9  -2 29196.0 4169.39   1
 -10  19  -2 22791.4 3553.39   1
  10   9   1 5420.89 1772.48   1
 -10  19   1 2934.18 1073.02   1
 -11  19  -9 239.391 429.434   1
 -11  19  -6 8743.18 2369.66   1
  11   8  -3 4615.23 1650.85   1
 -11  19  -3 2547.53 1259.81   1
 -11  19   0 24467.5 3755.98   1
  11   8   0 29246.5 4351.04   1
 -12  19 -10 10631.4 2788.54   1
 -12  19  -7 2843.47 1650.07   1
  12   7  -4 6421.78 1966.81   1
 -12  19  -4 6610.33 2146.75   1
  12   7  -1 1455.27 716.682   1
 -12  19  -1 1988.47 1125.74   1
 -13  19  -8 14722.2 3454.04   1
 -13  19  -5 7480.00 2363.42   1
 -13  19  -2 3767.48 1517.99   1
 -14  19  -9 2200.47 1504.82   1
 -14  19  -6 33081.7 4930.44   1
 -14  19  -3 7354.91 2447.81   1
 -15  19  -7 1469.90 1862.51   1
 -15  19  -4 2094.96 1479.60   1
 -16  19  -5 3066.17 1565.74   1
  -5  20  -1 783.339 589.928   1
  -5  20   2 6956.82 1722.22   1
  -6  20  -2 3976.31 1212.64   1
  -6  20   1 2776.15 1059.01   1
  -7  20  -3-170.406 401.573   1
  -7  20   0 10649.0 2051.71   1
  -8  20  -4 6967.21 1791.52   1
  -8  20  -1 3964.96 1296.62   1
  -9  20  -5 1008.02 668.048   1
  -9  20  -2 14233.9 2629.88   1
  -9  20   1 1269.86 786.001   1
 -10  20  -6 2294.35 957.476   1
 -10  20  -3-341.356 726.656   1
 -10  20   0 39062.6 4625.03   1
 -11  20  -7 1361.81 793.716   1
 -11  20  -4 234.603 648.949   1
 -11  20  -1-344.524 1021.67   1
 -12  20  -5 3110.86 1521.96   1
 -12  20  -2 5051.62 1766.00   1
 -13  20  -6 34434.1 5074.59   1
 -13  20  -3 4639.39 2056.33   1
 -14  20  -7 8727.72 2708.80   1
 -14  20  -4 9912.13 2798.09   1
  -8  21  -2 380.417 393.661   1
  -9  21  -3 3032.73 1278.42   1
 -10  21  -4 5284.30 1646.77   1
   0   0   0    0.00    0.00   0
TITL F779-100K in R3c
REM R3c (#161 in standard setting)
CELL 0.71073  15.280697  15.280697  23.334460  90.0000  90.0000 120.0000
ZERR   53.00   0.000708   0.000708   0.001133   0.0000   0.0000   0.0000
LATT -3
SYMM -y, x-y, z
SYMM -x+y,-x, z
SYMM -y,-x, z+1/2
SYMM -x+y, y, z+1/2
SYMM  x, x-y, z+1/2
SFAC C H N Cl Br Sb
UNIT 53.00 53.00 53.00 53.00 53.00 53.00
TREF
HKLF 4
END
;
_shelx_hkl_checksum   74574
